# Supplementary material for: Kazrin promotes dynein/dynactin-dependent traffic from early to recycling endosomes
Source: eLife journal article supplement (doi:10.7554/elife.83793), 2023-04-25
Supplement: supp [file elife-83793-supp-v1.zip]

| Year | Believe in climate change (%) | Do not believe in climate change (%) |
|------|-------------------------------|--------------------------------------|
| 2007 | 65                            | 35                                   |
| 2008 | 68                            | 32                                   |
| 2009 | 72                            | 28                                   |
| 2010 | 75                            | 25                                   |
| 2011 | 78                            | 22                                   |
| 2012 | 80                            | 20                                   |
| 2013 | 82                            | 18                                   |
| 2014 | 85                            | 15                                   |

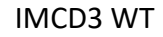

Anti kazrin

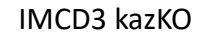

Anti kazrin

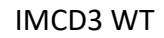

Anti EEA1

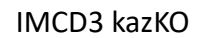

Anti EEA1
