# Supplementary material for: Kazrin promotes dynein/dynactin-dependent traffic from early to recycling endosomes
Source: eLife journal article supplement (doi:10.7554/elife.83793), 2023-04-25

optiprep fraction density

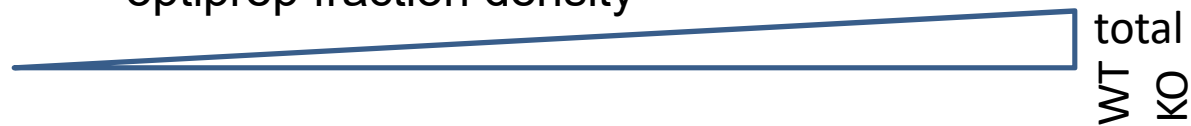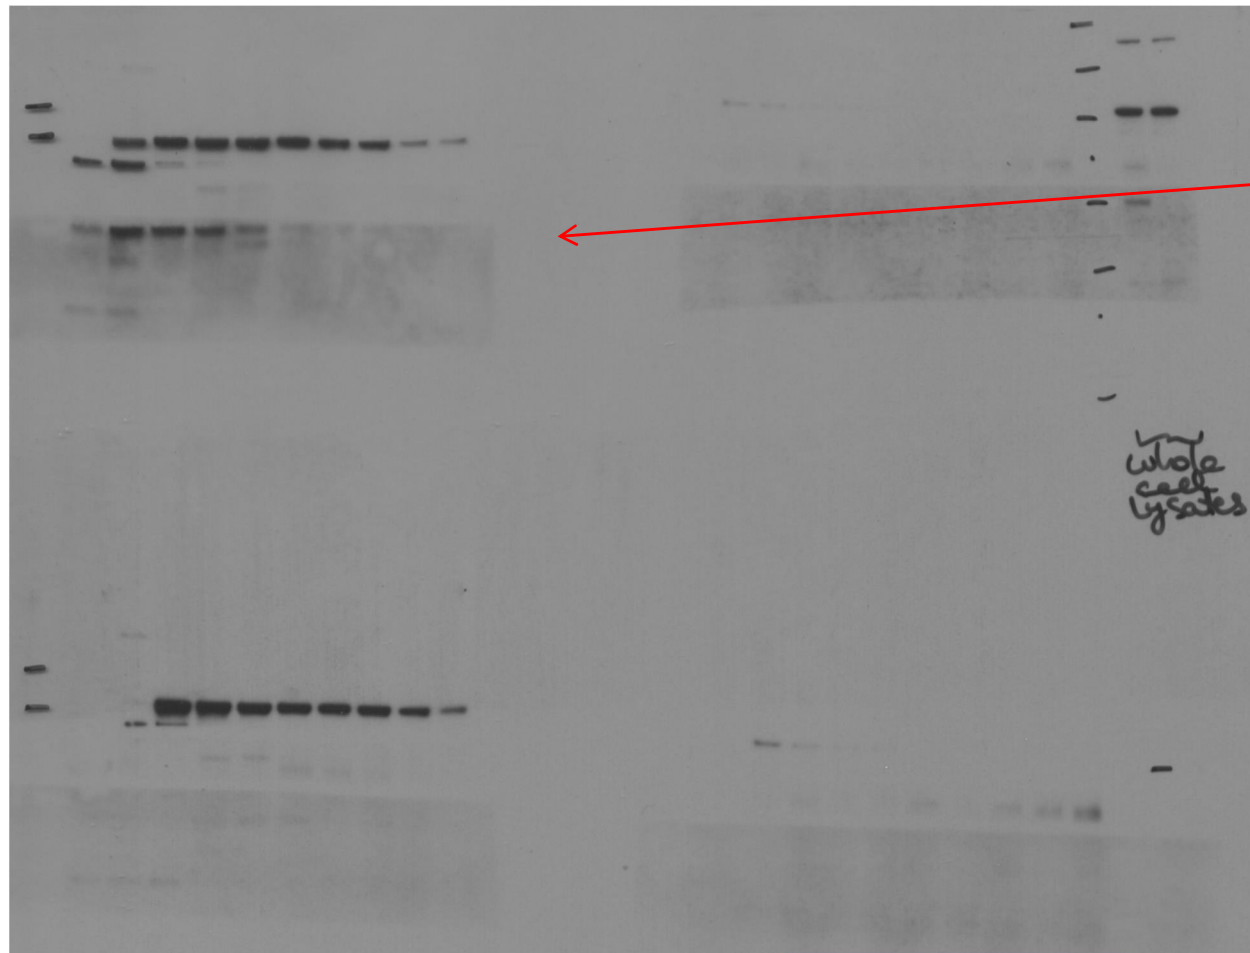

Anti gamma adaptin

Anti kazrin C  
Gradient WT MEF

Anti gamma adaptin

Anti kazrin C  
Gradient kazKO MEF

Gel 1 fractions 1 to 10

Gel 2 fractions 11 to 10

optiprep fraction density

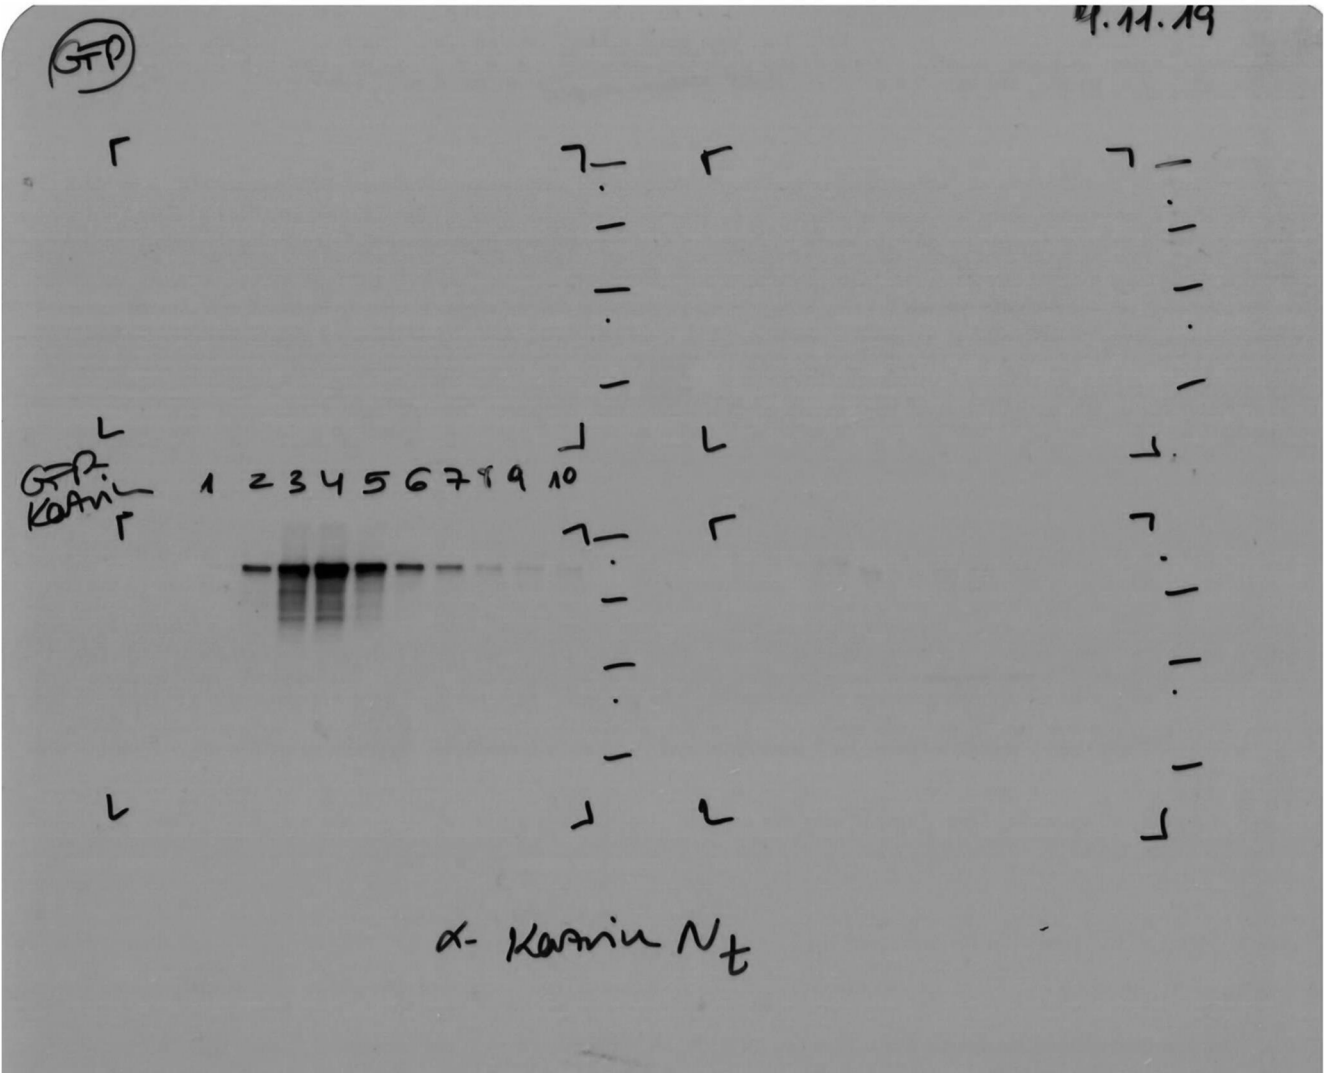

Anti kazrin C  
Gradient kazKOMEF  
GFP

Anti kazrin C  
Gradient kazKOMEF  
GFP-kazrin C

optiprep fraction density

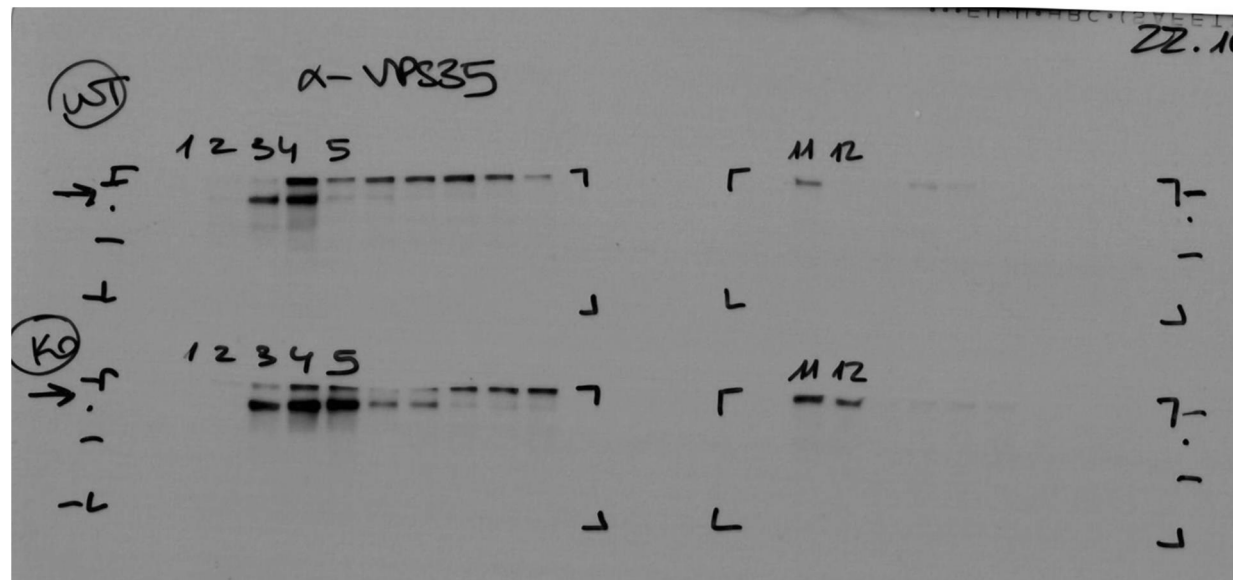

← Anti Vps35

Gel 1 fractions 1 to 10

Gel 2 fractions 11 to 10

# optiprep fraction density

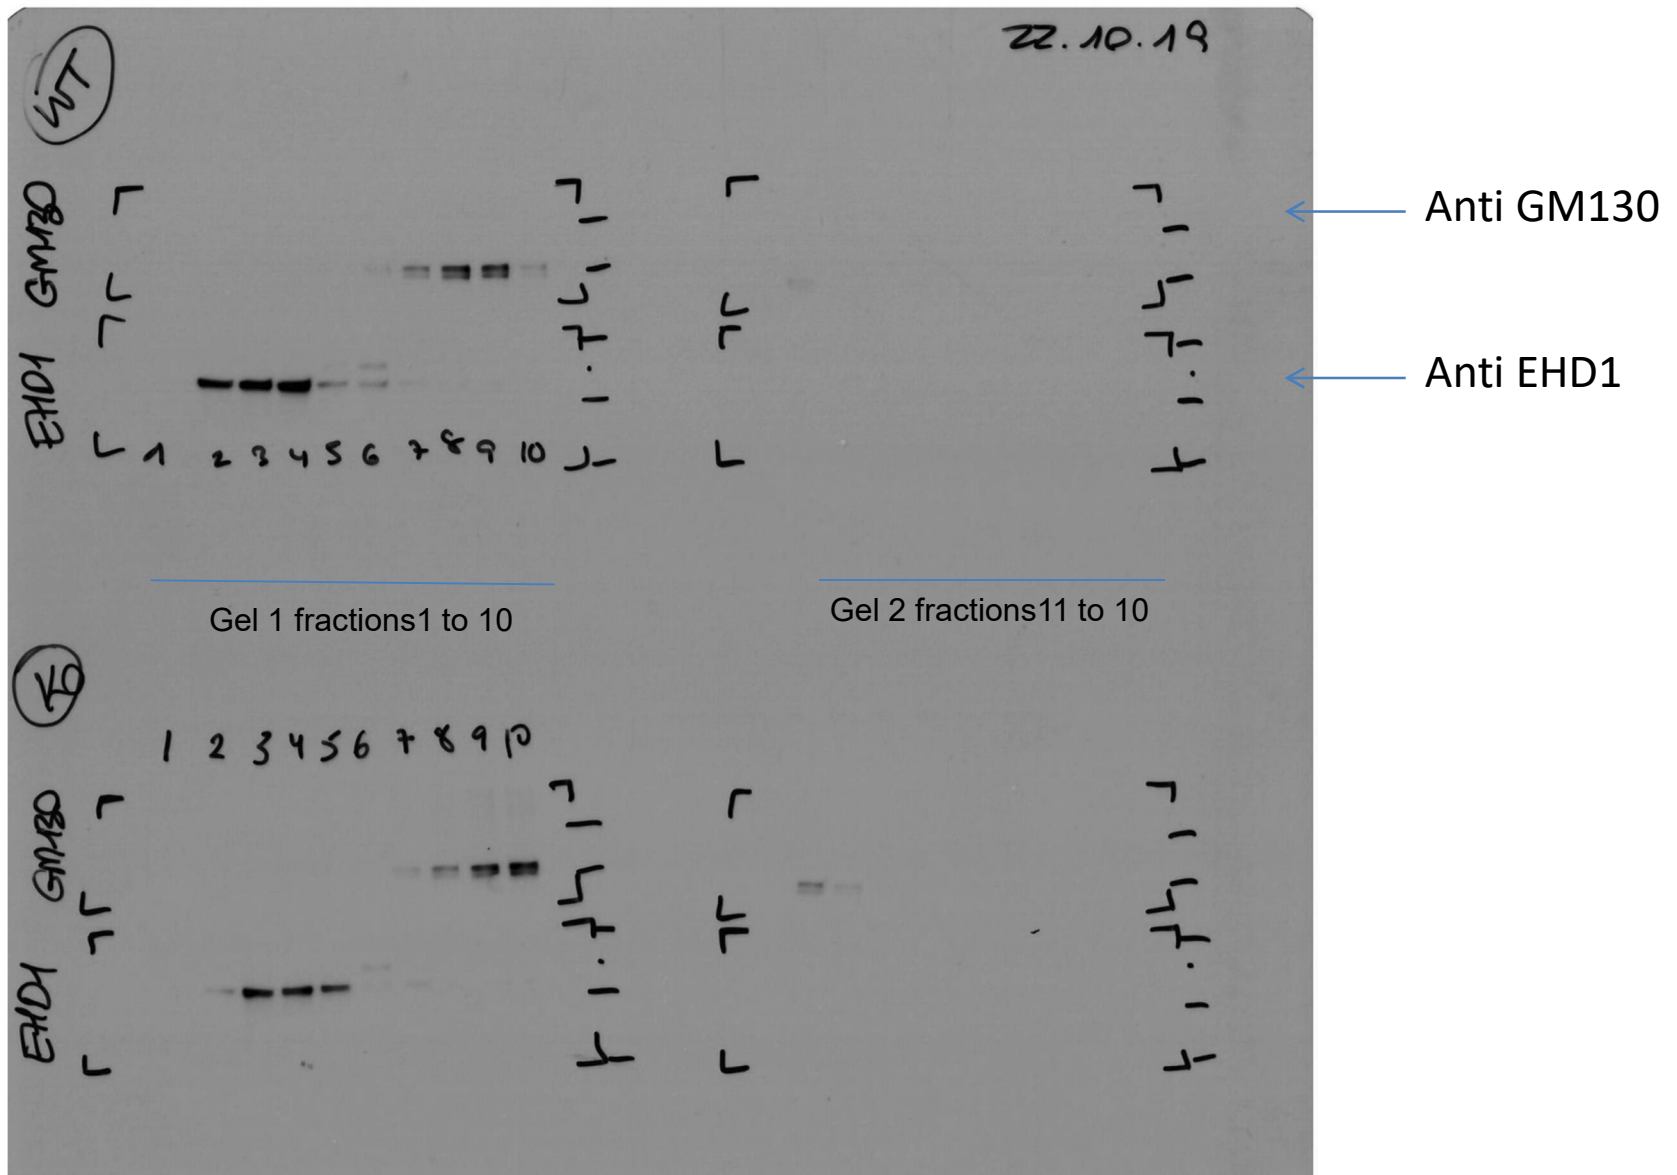

# optiprep fraction density

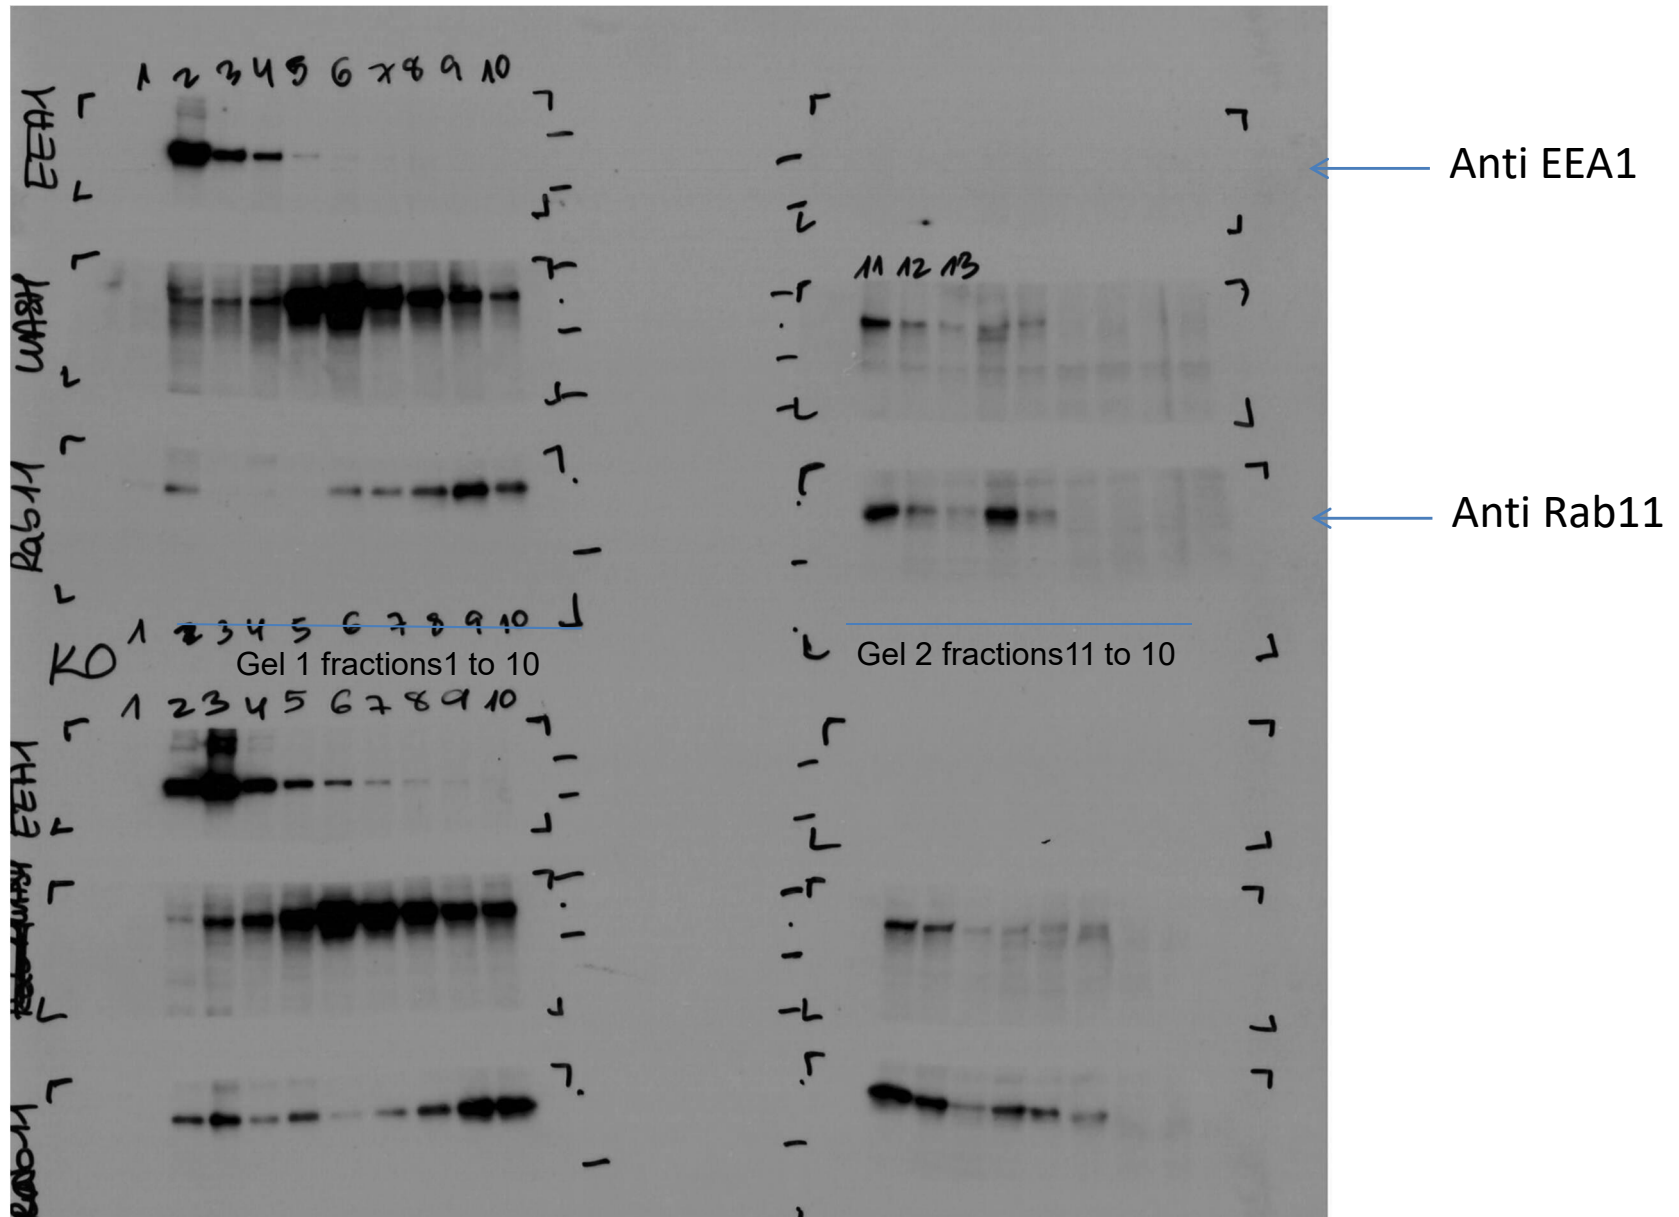

optiprep fraction density

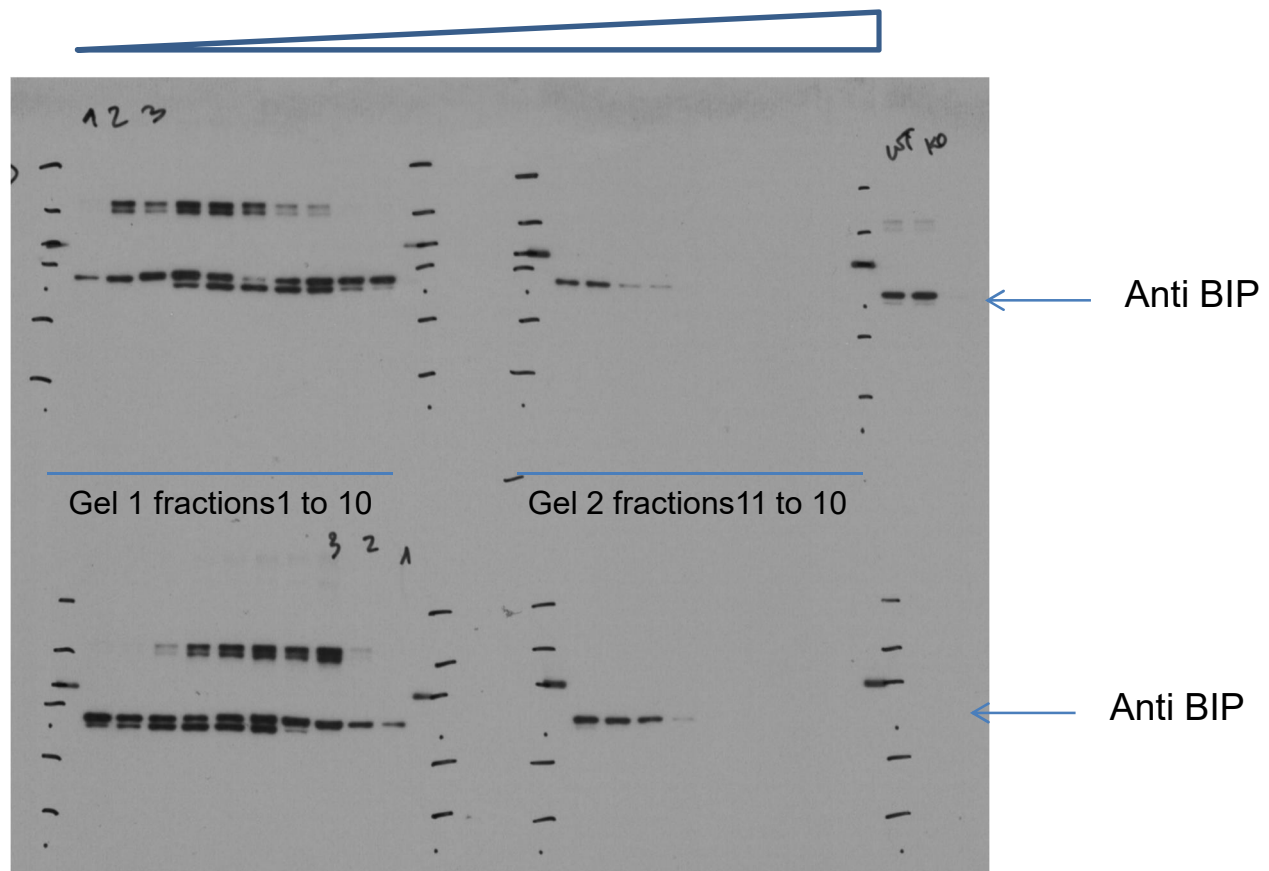

Supplement: supp [file elife-83793-supp-v1.zip]
