# Supplementary material for: Kazrin promotes dynein/dynactin-dependent traffic from early to recycling endosomes
Source: eLife journal article supplement (doi:10.7554/elife.83793), 2023-04-25
Supplement: supp [file elife-83793-supp-v1.zip]

Anti-p190-glued

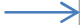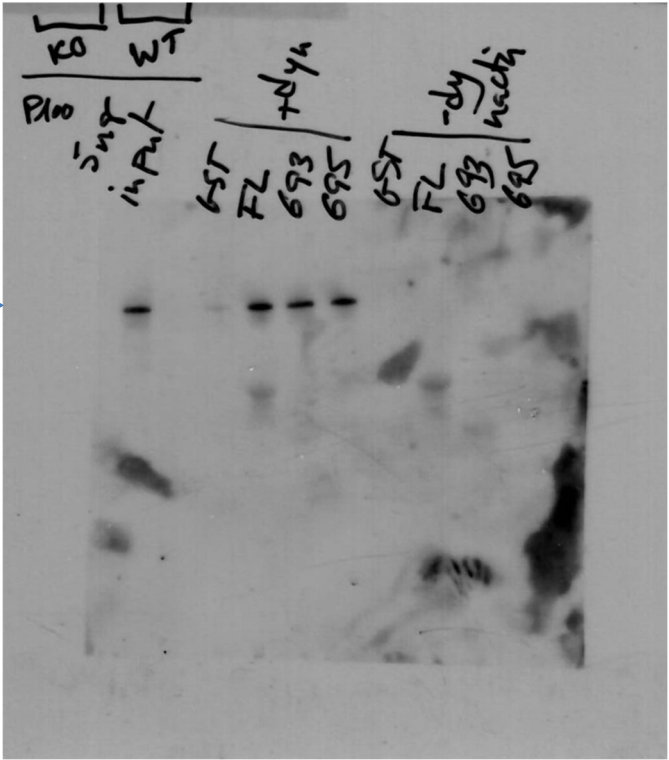

|                          |                |
|--------------------------|----------------|
| Input (5 ng)             |                |
| GST                      |                |
| GST-Kaz C                |                |
| GST-Kaz C Nt (aa1-176)   |                |
| GST-Kaz C Ct (aa250-327) |                |
| GST                      |                |
| GST-Kaz C                |                |
| GST-Kaz C Nt (aa1-176)   |                |
| GST-Kaz C Ct (aa250-327) |                |
| Plus dynactin            | Minus dynactin |

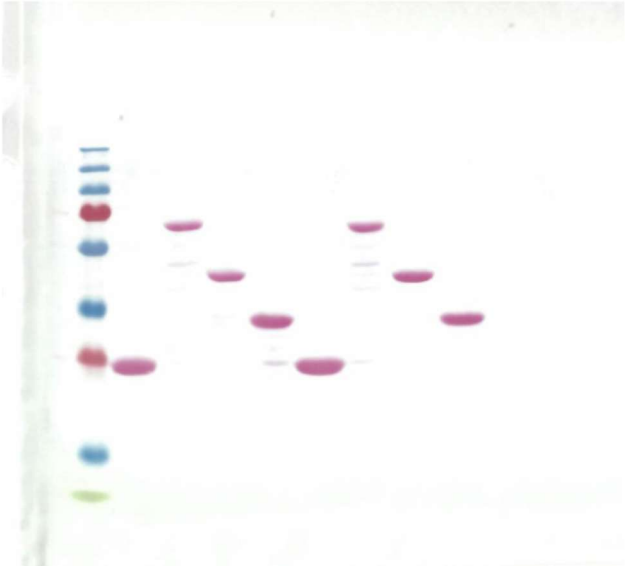

|                          |                |
|--------------------------|----------------|
| Input (5 ng)             |                |
| GST                      |                |
| GST-Kaz C                |                |
| GST-Kaz C Nt (aa1-176)   |                |
| GST-Kaz C Ct (aa250-327) |                |
| GST                      |                |
| GST-Kaz C                |                |
| GST-Kaz C Nt (aa1-176)   |                |
| GST-Kaz C Ct (aa250-327) |                |
| Plus dynactin            | Minus dynactin |

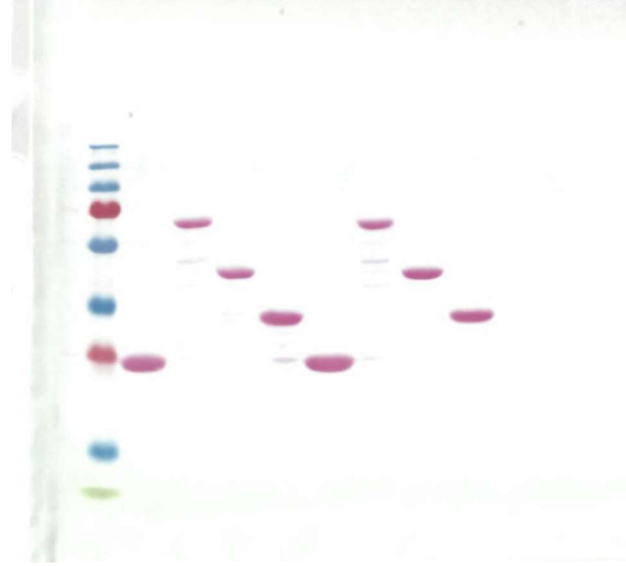

Input (5 ng)

GST

GST-Kaz C

GST-Kaz C Nt (aa1-176)

GST-Kaz C Ct (aa250-327)

GST

GST-Kaz C

GST-Kaz C Nt (aa1-176)

GST-Kaz C Ct (aa250-327)

Plus dynactin

Minus dynactin
