# Supplementary material for: Kazrin promotes dynein/dynactin-dependent traffic from early to recycling endosomes
Source: eLife journal article supplement (doi:10.7554/elife.83793), 2023-04-25
Supplement: supp [file figure 4B.source data.xlsx]

## Sheet: Hoja1
experiment	I	II	III	IV	V
GFP	2	0.1	0.1	0.9	0.1
GFP-Kaz	18	25.3	22.8	22.7	29.9
GFP-KazNt	6	1.4	0.8	2.6	0.24
