# Supplementary material for: Kazrin promotes dynein/dynactin-dependent traffic from early to recycling endosomes
Source: eLife journal article supplement (doi:10.7554/elife.83793), 2023-04-25
Supplement: supp [file Figure 4E.source data.xlsx]

## Sheet: Hoja1
GFP	GFP-Kaz	GFP-Kaz-Nt
0	25	1
0	24	2
0	34	1
0	38	2
0	24	1
0	7	1
0	14	2
0	17	3
0	18	7
0	21	2
0	5	4
0	3	1
0	12	1
0	16	2
0	26	1
0	14	0
0	5	0
1	12	1
1	4	0
1	4	1
1	12	1
2	12	1
3	15	0
0	11	0
0	6	1
0	19	3
0	6	2
0	19	1
0	16	3
2
0.366667	22.2	1.55172	average
0.76489	8.90716	1.45372	stdev
30	29	29	n
5.47723	5.38516	5.38516	sqn
0.139649	1.65402	0.269949	SEM
