# Supplementary material for: Kazrin promotes dynein/dynactin-dependent traffic from early to recycling endosomes
Source: eLife journal article supplement (doi:10.7554/elife.83793), 2023-04-25
Supplement: supp [file Figure 4G.source data.xlsx]

## Sheet: Hoja1
	KO		GFP-Kaz		GFP		GFP-Nt
	1.56816		1.91389		1.45336		1.14832
	0.476167		2.168		0.966966		0.605895
	1.37796		3.56212		0.728416		0.788099
	0.587389		1.4198		2.1417		0.770066
	0.979968		1.09843		0.928131		1.01846
	0.917593		2.12224		0.738407		2.39314
	0.809091		2.09072		0.461246		1.22086
	0.646184		1.49663		0.775779		0.946321
	1.02612		1.69819		0.963447		0.832897
	1.39949		1.88791		0.872964		1.4674
	1.17118		2.73767		0.661252		1.09275
	1.26876		3.38496		0.774671		1.49752
	0.763329		1.48915		1.06104		1.72025
	0.976992		1.66409		0.903724		1.00354
	1.01086		1.41596		1.5818		1.15606
	1.15756		1.5007		0.750341		1.28321
	1.15188		1.79051		1.21819		0.924832
	0.9494		1.18706		1.03052		0.762264
	1.17268		1.82385		0.60477		0.960014
	0.914618		1.19818		0.923556		0.74616
	1.61003		1.37342		0.968391		1.69632
	0.594944		1.89769		0.635285		0.944277
	0.691053		1.54098		1.53083		1.20502
	1.61003		1.43342		2.20713		1.98194
	0.594944		0.61294		1.08711		1.03601
	0.691053		2.51873		0.539003		0.866084
	1.21615		1.5617		1.59249		0.942919
	0.675749		1.89672		0.910189		1.45819
	1.01549		1.1838		0.700482		0.745582
					0.700482		1.73248
					0.645667		0.738423
					0.99582		1.05295
							0.768747
	1.00086		1.78171		1.02452		1.13658	av
	0.321856		0.638791		0.436293		0.40923	stdev
	28		28		31		32	n
	5.2915		5.2915		5.56776		5.65685	sqn
	0.0608251		0.12072		0.0783605		0.0723424	SEM
