# Supplementary material for: Kazrin promotes dynein/dynactin-dependent traffic from early to recycling endosomes
Source: eLife journal article supplement (doi:10.7554/elife.83793), 2023-04-25
Supplement: supp [file Figure 5D. source data.xlsx]

## Sheet: 5D cells with PN
	PN GFP-kazrin	Non-PN GFP-kazrin
DMSO	70	30
nocodazole	31	69

## Sheet: 5D EEA1 enrichment
DMSO	nocodazole
0.669132	0.407799
1.01558	0.640809
1.20952	0.688909
0.681128	0.584364
1.37693	0.428721
0.961363	0.312828
0.762683	0.695875
0.54863	0.486157
0.791392	0.402116
0.969908	0.696905
1.06324	0.203983
0.972449	0.430792
0.735645	0.611988
0.530324	0.833416
0.659469	0.350469
0.886589	0.989949
0.623544	0.482156
0.679878	0.623654
1.22725	0.747549
0.904413	0.601586
0.78369	0.385473
0.982732	0.443734
0.825087	1.02428
0.837653	1.12732
0.992995	0.508031
1.15103	0.353612
1.24297	0.722944
1.27823	0.651155
1.52036	0.207065
0.72816	0.425381
0.988647
0.889236
1.5214
1.91359
0.990126
1.02987
0.999148
0.906759
0.52356
0.871359
0.769121
0.912176
0.894597
0.984089
1.50977
0.711889
0.684191
0.689898
0.985135
1.5768
1.60196
0.963845
1.7046
1.46661
1.12362
0.950544
1.22548
