# Supplementary material for: Kazrin promotes dynein/dynactin-dependent traffic from early to recycling endosomes
Source: eLife journal article supplement (doi:10.7554/elife.83793), 2023-04-25
Supplement: supp [file Figure 5F. source data.xlsx]

## Sheet: Hoja1
	pericentrin	pericentrin		GFP kazrin C	GFP-kazrin C		pericentrin	pericentrin		GFP kazrin C	GFP-kazrin C			EEA1	EEA1		EEA1	EEA1
	DMSO	ciliobrevin		DMSO	ciliobrevin		DMSO	ciliobrevin		DMSO	ciliobrevin			DMSO	ciliobrevin		DMSO	ciliobrevin
	45.7	33.925		34.399	6.725		1.02193	0.758619		0.8515	0.166468			2.85421	1.40662		0.756984	0.373058
	33.062	42.975		26.063	10.401		0.739321	0.960992		0.645154	0.257463			3.34756	2.40502		0.887829	0.637853
	47.925	28.124		0.638	1.925		1.07168	0.628899		0.0157928	0.0476508			4.557	2.31542		1.20859	0.614088
	49.325	31.65		4	4.801		1.10299	0.707747		0.0990146	0.118842			2.93512	1.89881		0.778442	0.503595
	52.775	56.037		14.45	16.912		1.18014	1.25308		0.35769	0.418634			1.92841	1.32101		0.511446	0.350353
	88	103.813		111.95	24.312		1.96783	2.32143		2.77117	0.60181			2.43792	2.72018		0.646577	0.721437
	21.175	111.362		27.363	18.937		0.473508	2.49024		0.677334	0.46876			8.00788	1.74214		2.12383	0.462044
	23.212	29.451		66.425	5.388		0.519059	0.658573		1.64426	0.133373			3.86352	4.39342		1.02467	1.16521
	16.337	30.85		7.35	11.3		0.365322	0.689857		0.181939	0.279716			4.03744	2.92035		1.0708	0.774525
	60.801	40.212		12.75	2.449		1.35961	0.899207		0.315609	0.0606217			5.65891	0.999449		1.50084	0.265071
	72.45	46.2		89.463	9.013		1.6201	1.03311		2.21453	0.223105			2.16538	3.60898		0.574295	0.957163
	26.825	65.738		39.137	6.15		0.599852	1.47001		0.968783	0.152235			2.04232	2.17062		0.541659	0.575684
	21.637	18.162		47.35	-5.975		0.483839	0.406132		1.17208	-0.147903			3.50186	2.2943		0.928752	0.608486
	35.912	53.375		35.163	5.85		0.803052	1.19355		0.870412	0.144809			2.19826	1.88682		0.583017	0.500416
	24.063	55.6		34.426	15.338		0.538089	1.24331		0.852169	0.379671			1.78738	0.483699		0.474043	0.128285
	49.612	43.925		31.438	23.463		1.10941	0.982236		0.778205	0.580795			6.01786	1.64369		1.59604	0.435934
	44.387	28.349		33.799	26.188		0.992567	0.633931		0.836648	0.648248			3.90006	2.92095		1.03436	0.774685
	31.725	29.137		55.725	41.125		0.709424	0.651552		1.3794	1.01799			5.92033	1.43711		1.57017	0.381146
	25.15	31.025		29.201	33.113		0.562396	0.69377		0.722831	0.819667			4.34301	0.225917		1.15184	0.0599171
	54.001	38.412		73.312	4.175		1.20755	0.858956		1.81474	0.103346			4.68289	2.37779		1.24198	0.630631
	60.275	94.162		52.213	13.687		1.34785	2.10562		1.29246	0.338803			6.33619	2.71261		1.68046	0.719431
	88.275	108.062		125.138	51.8		1.97398	2.41645		3.09762	1.28224			4.07621	1.51623		1.08108	0.402131
	35.563	62.35		27.4	29.363		0.795248	1.39425		0.67825	0.726841			2.51658	1.98281		0.667438	0.525874
	49.875	39.713		27.488	22.313		1.11529	0.888049		0.680428	0.552328			8.99068	1.72984		2.38448	0.458783
	56.238	32.212		25.05	2.576		1.25758	0.720314		0.620079	0.0637654			2.65017	0.979119		0.70287	0.259679
	58.262	63.163		40.626	10.25		1.30284	1.41243		1.00564	0.253725			1.55582	0.786476		0.41263	0.208587
	32.6	34.912		16.75	12.062		0.72899	0.78069		0.414623	0.298578			2.57147	3.19897		0.681997	0.84842
	52.001	33.237		28.9	7.788		1.16283	0.743234		0.71538	0.192781			2.31414	1.62477		0.613748	0.430915
	41.288	18.075		24.925	0.663		0.923268	0.404187		0.616984	0.0164117			2.14559	1.54791		0.569047	0.410531
	35.975	62.625		42.788	6.074		0.804461	1.4004		1.05916	0.150354				1.90206			0.504459
	26.976	41.162		61.625	12.125		0.603228	0.920451		1.52544	0.300138				2.70282			0.716833
	29.187	41.937		29.938	3.587		0.65267	0.937781		0.741074	0.0887913				1.0478			0.277894
	37.25	45.837		23.775	1.55		0.832972	1.02499		0.588518	0.0383681
	84.976	52.625		84.362	0.388		1.9002	1.17678		2.08827	0.00960441
	55.987	98.825		46.338	38.851		1.25196	2.20989		1.14703	0.961704
	43.987	13.675		35.838	3.887		0.983622	0.305796		0.887121	0.0962174
	56.2	13.612		19.35	22.537		1.25673	0.304387		0.478983	0.557873
	35.687	16.774		22.912	21.963		0.798021	0.375094		0.567155	0.543664
	54.425	22.238		41.387	15.576		1.21703	0.497279		1.02448	0.385563
	44.2	10.35		39.35	-0.475		0.988385	0.231443		0.974056	-0.011758
	47.751	27.612		29.988	9.588		1.06779	0.61745		0.742312	0.237338
	36.151	27.262		75.474	15.688		0.808396	0.609624		1.86826	0.388335
	40.888	27.087		35.525	2.188		0.914324	0.60571		0.879373	0.054161
	39.563	33.513		45.975	4.4		0.884694	0.749406		1.13805	0.108916
average	44.7194			40.3981			1	0.985611		1	0.320683			3.77049	1.96574		0.999997	0.521347
