# Supplementary material for: Kazrin promotes dynein/dynactin-dependent traffic from early to recycling endosomes
Source: eLife journal article supplement (doi:10.7554/elife.83793), 2023-04-25
Supplement: supp [file figure 6B.source data.xlsx]

## Sheet: Hoja1
WT	µm		KO	µm		GFP	µm		GFP-Kazrin C	µm		GFP-Kazrin C-Nt	µm
10	1.70098		7	1.19069		9	0.86103		7	0.66969		5	0.47835
12	2.04118		8	1.36078		12	1.14804		11	1.05237		8	0.76536
13	2.21127		8	1.36078		12	1.14804		12	1.14804		12	1.14804
13	2.21127		9	1.53088		13	1.24371		12	1.14804		12	1.14804
16	2.72157		9	1.53088		13	1.24371		16	1.53072		13	1.24371
16	2.72157		9	1.53088		13	1.24371		17	1.62639		13	1.24371
16	2.72157		9	1.53088		15	1.43505		19	1.81773		13	1.24371
17	2.89167		10	1.70098		15	1.43505		19	1.81773		13	1.24371
17	2.89167		10	1.70098		15	1.43505		20	1.9134		13	1.24371
18	3.06176		10	1.70098		15	1.43505		21	2.00907		14	1.33938
19	3.23186		10	1.70098		15	1.43505		21	2.00907		14	1.33938
19	3.23186		10	1.70098		16	1.53072		22	2.10474		14	1.33938
20	3.40196		10	1.70098		16	1.53072		22	2.10474		14	1.33938
21	3.57206		10	1.70098		16	1.53072		22	2.10474		14	1.33938
21	3.57206		10	1.70117		17	1.62639		24	2.29608		14	1.33938
21	3.57206		11	1.87108		17	1.62639		24	2.29608		14	1.33938
21	3.57206		11	1.87108		17	1.62639		24	2.29608		14	1.33938
23	3.91225		11	1.87108		18	1.72206		28	2.67876		15	1.43505
23	3.91225		11	1.87108		18	1.72206		29	2.77443		15	1.43505
23	3.91225		11	1.87129		18	1.72206		29	2.77443		16	1.53072
24	4.08235		11	1.87129		18	1.72206		30	2.8701		16	1.53072
25	4.25245		11	1.87129		18	1.72206		31	2.96577		16	1.53072
25	4.25245		11	1.87129		18	1.72206		31	2.96577		16	1.53072
26	4.42255		12	2.04118		18	1.72206		32	3.06144		17	1.62639
27	4.59265		12	2.04118		18	1.72206		32	3.06144		17	1.62639
28	4.76275		12	2.04118		19	1.81773		32	3.06144		17	1.62639
28	4.76275		12	2.04118		19	1.81773		32	3.06144		17	1.62639
28	4.76275		12	2.04118		19	1.81773		32	3.06144		18	1.72206
28	4.76275		12	2.04118		19	1.81773		33	3.15711		18	1.72206
28	4.76275		12	2.04118		19	1.81773		33	3.15711		18	1.72206
28	4.76328		12	2.04118		20	1.9134		33	3.15711		18	1.72206
28	4.76328		13	2.21127		20	1.9134		34	3.25278		18	1.72206
28	4.76328		13	2.21127		21	2.00907		35	3.34845		18	1.72206
29	4.93284		13	2.21127		21	2.00907		35	3.34845		19	1.81773
29	4.9334		13	2.21127		21	2.00907		36	3.44412		19	1.81773
30	5.10294		13	2.21127		21	2.00907		37	3.53979		19	1.81773
30	5.10352		13	2.21127		21	2.00907		37	3.53979		19	1.81773
31	5.27304		13	2.21127		22	2.10474		37	3.53979		19	1.81773
31	5.27304		13	2.21127		22	2.10474		38	3.63546		19	1.81773
31	5.27304		14	2.38137		22	2.10474		40	3.8268		19	1.81773
31	5.27304		14	2.38137		22	2.10474		42	4.01814		19	1.81773
31	5.27363		14	2.38137		23	2.20041		42	4.01814		20	1.9134
31	5.27363		14	2.38137		23	2.20041		42	4.01814		20	1.9134
31	5.27363		14	2.38137		23	2.20041		42	4.01814		20	1.9134
31	5.27363		14	2.38137		24	2.29608		42	4.01814		20	1.9134
32	5.44314		14	2.38137		24	2.29608		43	4.11381		20	1.9134
32	5.44314		14	2.38137		24	2.29608		44	4.20948		20	1.9134
32	5.44314		14	2.38137		24	2.29608		44	4.20948		20	1.9134
32	5.44314		14	2.38164		24	2.29608		44	4.20948		20	1.9134
32	5.44375		14	2.38164		24	2.29608		44	4.20948		21	2.00907
32	5.44375		14	2.38164		24	2.29608		45	4.30515		21	2.00907
32	5.44375		14	2.38164		25	2.39175		46	4.40082		21	2.00907
32	5.44375		15	2.55147		25	2.39175		46	4.40082		21	2.00907
33	5.61324		15	2.55147		26	2.48742		46	4.40082		21	2.00907
33	5.61324		15	2.55147		26	2.48742		48	4.59216		21	2.00907
33	5.61324		15	2.55176		27	2.58309		48	4.59216		21	2.00907
33	5.61387		15	2.55176		28	2.67876		48	4.59216		22	2.10474
33	5.61387		16	2.72157		29	2.77443		48	4.59216		22	2.10474
33	5.61387		16	2.72157		29	2.77443		49	4.68783		23	2.20041
34	5.78333		17	2.89167		29	2.77443		49	4.68783		23	2.20041
34	5.78333		17	2.89167		29	2.77443		49	4.68783		24	2.29608
34	5.78398		17	2.89167		29	2.77443		50	4.7835		24	2.29608
34	5.78398		17	2.89167		29	2.77443		51	4.87917		24	2.29608
34	5.78398		17	2.89167		29	2.77443		51	4.87917		25	2.39175
36	6.12353		17	2.89167		30	2.8701		51	4.87917		25	2.39175
36	6.12353		17	2.89167		30	2.8701		51	4.87917		26	2.48742
36	6.12353		17	2.89167		31	2.96577		53	5.07051		26	2.48742
36	6.12353		18	3.06176		31	2.96577		53	5.07051		26	2.48742
36	6.12422		18	3.06176		32	3.06144		54	5.16618		27	2.58309
36	6.12422		18	3.06176		32	3.06144		54	5.16618		27	2.58309
36	6.12422		18	3.06211		32	3.06144		54	5.16618		27	2.58309
36	6.12422		19	3.23186		32	3.06144		56	5.35752		27	2.58309
36	6.12422		19	3.23186		32	3.06144		56	5.35752		28	2.67876
37	6.29363		19	3.23186		33	3.15711		56	5.35752		28	2.67876
37	6.29363		19	3.23186		34	3.25278		56	5.35752		28	2.67876
37	6.29434		19	3.23186		34	3.25278		56	5.35752		28	2.67876
37	6.29434		19	3.23186		35	3.34845		58	5.54886		29	2.77443
37	6.29434		20	3.40196		35	3.34845		59	5.64453		29	2.77443
39	6.63382		20	3.40196		35	3.34845		61	5.83587		30	2.8701
39	6.63382		20	3.40196		35	3.34845		61	5.83587		31	2.96577
39	6.63457		21	3.57206		36	3.44412		61	5.83587		31	2.96577
39	6.63457		21	3.57206		37	3.53979		62	5.93154		31	2.96577
39	6.63457		21	3.57206		37	3.53979		63	6.02721		32	3.06144
39	6.63457		21	3.57206		40	3.8268		63	6.02721		33	3.15711
40	6.80392		21	3.57206		40	3.8268		65	6.21855		34	3.25278
40	6.80469		21	3.57246		41	3.92247		67	6.40989		35	3.34845
40	6.80469		22	3.74216		41	3.92247		69	6.60123		35	3.34845
41	6.97402		23	3.91225		45	4.30515		69	6.60123		36	3.44412
41	6.9748		23	3.91225		47	4.49649		71	6.79257		36	3.44412
42	7.14492		23	3.9127		47	4.49649		71	6.79257		36	3.44412
43	7.31422		23	3.9127		47	4.49649		76	7.27092		36	3.44412
45	7.65441		24	4.08235		47	4.49649		77	7.36659		37	3.53979
45	7.65441		25	4.25245		49	4.68783		81	7.74927		38	3.63546
46	7.82451		26	4.42255		49	4.68783		81	7.74927		38	3.63546
46	7.82451		30	5.10294		51	4.87917		83	7.94061		39	3.73113
46	7.82451		31	5.27304		61	5.83587		84	8.03628		40	3.8268
51	8.675		33	5.61387		69	6.60123		86	8.22762		41	3.92247
54	9.18529		34	5.78398		74	7.07958		86	8.22762		45	4.30515
60	10.2059		37	6.29434		76	7.27092		91	8.70597		52	4.97484
80	13.6078		44	7.48431		97	9.27999		93	8.89731		58	5.54886
	5.44847			2.75905			2.74477			4.37212			2.23389	av
	1.23761			0.587174			1.40755			1.86998			0.892752	sdevt
	100			100			100			100			100	n
	10			10			10			10			10	sqn
	0.123761			0.0587174			0.140755			0.186998			0.0892752	SEM
