# Supplementary material for: Kazrin promotes dynein/dynactin-dependent traffic from early to recycling endosomes
Source: eLife journal article supplement (doi:10.7554/elife.83793), 2023-04-25
Supplement: supp [file figure 6C.source data.xlsx]

## Sheet: Hoja1
WT	um/sec		KO	µm/sec		GFP	um/sec		GFP-Kazrin C	µm/sec		GFP-Kazrin C-Nt	um/sec
1.736	0.295323		1.202	0.204481		1.7	0.1446		2.681	0.228042		1.886	0.160421
2.062	0.350782		1.269	0.215879		1.886	0.160421		3.073	0.261385		1.886	0.160421
2.108	0.358607		1.269	0.215879		2.348	0.199718		3.201	0.272273		2.122	0.180494
2.222	0.378		1.423	0.242077		2.357	0.200483		3.399	0.289114		2.393	0.203545
2.362	0.401817		1.423	0.242077		2.393	0.203545		3.582	0.30468		2.393	0.203545
2.404	0.408962		1.571	0.267254		2.811	0.2391		3.606	0.306721		2.687	0.228552
2.455	0.417638		1.602	0.272528		2.867	0.243863		3.801	0.323308		2.749	0.233826
2.514	0.427675		1.692	0.287838		2.99	0.254325		4.025	0.342361		2.811	0.2391
2.539	0.431928		1.832	0.311655		3.018	0.256707		4.123	0.350697		2.848	0.242247
2.603	0.442815		1.832	0.311655		3.073	0.261385		4.222	0.359117		3	0.255176
2.667	0.453703		1.863	0.316928		3.073	0.261385		4.228	0.359628		3.073	0.261385
2.676	0.455234		1.863	0.316928		3.087	0.262576		4.269	0.363115		3.143	0.267339
2.685	0.456765		1.863	0.316928		3.143	0.267339		4.333	0.368559		3.143	0.267339
2.685	0.456765		1.899	0.323053		3.236	0.27525		4.444	0.378		3.205	0.272613
2.687	0.457105		2	0.340234		3.385	0.287923		4.534	0.385656		3.205	0.272613
2.703	0.459827		2.049	0.34857		3.385	0.287923		4.643	0.394927		3.283	0.279247
2.846	0.484154		2.049	0.34857		3.543	0.301363		4.643	0.394927		3.333	0.2835
2.897	0.492829		2.096	0.356566		3.59	0.30536		4.643	0.394927		3.339	0.284011
2.93	0.498443		2.189	0.372387		3.59	0.30536		4.714	0.400966		3.385	0.287923
3.023	0.514264		2.189	0.372387		3.664	0.311655		4.738	0.403008		3.471	0.295238
3.087	0.525152		2.2	0.374258		3.771	0.320756		4.955	0.421465		3.556	0.302468
3.114	0.529745		2.222	0.378		3.778	0.321351		4.969	0.422656		3.583	0.304765
3.119	0.530596		2.222	0.378		3.784	0.321862		5	0.425293		3.59	0.30536
3.119	0.530596		2.224	0.378341		3.797	0.322967		5.044	0.429036		3.606	0.306721
3.182	0.541313		2.228	0.379021		3.801	0.323308		5.088	0.432778		3.606	0.306721
3.182	0.541313		2.236	0.380382		3.823	0.325179		5.088	0.432778		3.606	0.306721
3.3	0.561387		2.357	0.400966		3.823	0.325179		5.099	0.433714		3.665	0.31174
3.333	0.567001		2.393	0.40709		3.823	0.325179		5.116	0.43516		3.682	0.313186
3.341	0.568362		2.404	0.408962		3.9002	0.331746		5.183	0.440859		3.682	0.313186
3.392	0.577037		2.404	0.408962		3.914	0.332919		5.217	0.443751		3.777	0.321266
3.399	0.578228		2.404	0.408962		4.014	0.341425		5.245	0.446132		3.823	0.325179
3.478	0.591668		2.404	0.408962		4.028	0.342616		5.425	0.461443		3.833	0.32603
3.48	0.592008		2.404	0.408962		4.123	0.350697		5.548	0.471905		3.887	0.330623
3.5	0.59541		2.427	0.412874		4.151	0.353078		5.825	0.495466		4.098	0.34857
3.543	0.602725		2.444	0.415766		4.193	0.356651		5.846	0.497253		4.098	0.34857
3.555	0.604767		2.455	0.417638		4.243	0.360904		5.935	0.504823		4.098	0.34857
3.562	0.605957		2.5	0.425293		4.377	0.372301		6.009	0.511117		4.101	0.348825
3.6	0.612422		2.534	0.431077		4.472	0.380382		6.009	0.511117		4.123	0.350697
3.784	0.643723		2.676	0.455234		4.631	0.393906		6.119	0.520474		4.193	0.356651
3.797	0.645935		2.693	0.458126		4.64	0.394672		6.174	0.525152		4.193	0.356651
3.801	0.646615		2.713	0.461528		4.64	0.394672		6.174	0.525152		4.216	0.358607
3.881	0.660225		2.749	0.467652		4.725	0.401902		6.403	0.54463		4.346	0.369665
4.028	0.685232		2.784	0.473606		4.725	0.401902		6.46	0.549479		4.377	0.372301
4.104	0.698161		2.811	0.478199		4.738	0.403008		6.472	0.550499		4.384	0.372897
4.117	0.700372		2.846	0.484154		4.773	0.405985		6.596	0.561046		4.444	0.378
4.126	0.701904		2.853	0.485344		4.787	0.407175		6.708	0.570573		4.447	0.378256
4.246	0.722318		2.867	0.487726		4.807	0.408877		6.749	0.57406		4.467	0.379957
4.315	0.734056		2.897	0.492829		4.879	0.415001		6.784	0.577037		4.576	0.389228
4.315	0.734056		2.897	0.492829		5	0.425293		6.799	0.578313		4.576	0.389228
4.444	0.756001		2.923	0.497253		5	0.425293		6.872	0.584523		4.576	0.389228
4.467	0.759913		2.965	0.504397		5.004	0.425633		7.059	0.600429		4.58	0.389568
4.472	0.760764		2.965	0.504397		5.067	0.430992		7.14	0.607318		4.64	0.394672
4.472	0.760764		2.981	0.507119		5.183	0.440859		7.157	0.608764		4.679	0.397989
4.488	0.763486		3.023	0.514264		5.183	0.440859		7.289	0.619992		4.773	0.405985
4.5	0.765527		3.087	0.525152		5.183	0.440859		7.381	0.627817		4.787	0.407175
4.581	0.779307		3.111	0.529235		5.344	0.454553		7.454	0.634027		4.807	0.408877
4.624	0.786622		3.119	0.530596		5.518	0.469353		7.52	0.639641		5	0.425293
4.624	0.786622		3.143	0.534678		5.52	0.469523		7.556	0.642703		5.028	0.427675
4.679	0.795978		3.158	0.53723		5.573	0.474032		7.601	0.64653		5.067	0.430992
4.709	0.801082		3.171	0.539442		5.595	0.475903		7.782	0.661926		5.077	0.431842
4.725	0.803804		3.171	0.539442		5.676	0.482793		7.81	0.664308		5.268	0.448089
4.756	0.809077		3.281	0.558154		5.778	0.491469		7.867	0.669156		5.356	0.455574
4.773	0.811969		3.321	0.564959		5.788	0.492319		7.902	0.672133		5.356	0.455574
4.919	0.836806		3.399	0.578228		5.821	0.495126		8.012	0.681489		5.37	0.456765
4.934	0.839358		3.45	0.586904		5.831	0.495977		8.012	0.681489		5.375	0.45719
4.994	0.849565		3.45	0.586904		5.846	0.497253		8.049	0.684637		5.407	0.459912
4.994	0.849565		3.471	0.590477		6.004	0.510692		8.195	0.697055		5.407	0.459912
5.028	0.855349		3.583	0.60953		6.285	0.534593		8.28	0.704285		5.426	0.461528
5.067	0.861984		3.583	0.60953		6.368	0.541653		8.333	0.708793		5.497	0.467567
5.077	0.863685		3.583	0.60953		6.472	0.550499		8.34	0.709389		5.569	0.473691
5.118	0.87066		3.618	0.615484		6.549	0.557049		8.439	0.717809		5.831	0.495977
5.183	0.881717		3.784	0.643723		6.566	0.558495		8.491	0.722233		5.846	0.497253
5.217	0.887501		3.823	0.650358		6.607	0.561982		8.63	0.734056		5.879	0.500059
5.222	0.888352		3.887	0.661246		6.799	0.578313		8.647	0.735502		5.93	0.504397
5.23	0.889713		3.975	0.676216		6.864	0.583842		8.692	0.739329		5.93	0.504397
5.282	0.898559		4.006	0.681489		6.872	0.584523		9.065	0.771056		6.009	0.511117
5.338	0.908086		4.006	0.681489		6.936	0.589966		9.357	0.795893		6.045	0.514179
5.375	0.91438		4.025	0.684722		7.157	0.608764		9.44	0.802953		6.19	0.526513
5.467	0.930031		4.079	0.693908		7.18	0.610721		9.735	0.828045		6.19	0.526513
5.595	0.951806		4.098	0.69714		7.318	0.622459		9.759	0.830087		6.471	0.550414
5.595	0.951806		4.175	0.710239		7.364	0.626371		9.871	0.839613		6.471	0.550414
5.666	0.963884		4.222	0.718235		7.401	0.629519		10.062	0.85586		6.472	0.550499
5.692	0.968307		4.294	0.730483		7.542	0.641512		10.333	0.87891		6.607	0.561982
5.702	0.970008		4.383	0.745624		7.762	0.660225		10.382	0.883078		7.008	0.596091
5.762	0.980215		4.428	0.753279		7.891	0.671197		10.414	0.8858		7.027	0.597707
5.831	0.991953		4.45	0.757021		8.028	0.68285		10.817	0.920079		7.211	0.613358
6.009	1.02223		4.488	0.763486		8.462	0.719766		11.004	0.935985		7.732	0.657673
6.289	1.06987		4.581	0.779307		8.57	0.728952		11.004	0.935985		8.195	0.697055
6.321	1.07531		4.631	0.787813		8.63	0.734056		11.643	0.990337		8.444	0.718235
6.596	1.12209		4.709	0.801082		9.068	0.771311		11.651	0.991018		8.537	0.726145
6.667	1.13417		4.709	0.801082		9.431	0.802188		11.734	0.998078		8.549	0.727166
6.972	1.18606		5.207	0.8858		9.69	0.824218		11.743	0.998843		8.63	0.734056
7.166	1.21906		5.375	0.91438		9.747	0.829066		12.481	1.06162		9.007	0.766123
7.238	1.23131		5.488	0.933603		10.355	0.880782		12.571	1.06927		9.025	0.767654
7.467	1.27027		5.595	0.951806		10.667	0.90732		12.684	1.07888		9.112	0.775054
7.491	1.27435		5.692	0.968307		10.731	0.912764		14.938	1.27061		10.461	0.889798
7.569	1.28762		5.897	1.00318		10.965	0.932667		15.391	1.30914		11.331	0.963799
7.601	1.29306		6.19	1.05303		11.101	0.944235		16.518	1.405		13.842	1.17738
7.701	1.31007		6.289	1.06987		11.912	1.01322		16.974	1.44378		15.502	1.31858
8.5	1.446		6.562	1.11631		13.956	1.18708		24.413	2.07654		16.338	1.38969
	0.751566			0.539317	av		0.475868	av		0.644264	av		0.448135	av
	1.50519			1.21205	stde		0.204526	stdev		0.290544	stdev		0.219072	stdev
	100			100	n		100	n		100	n		100	n
	10			10	sqn		10	sqn		10	sqn		10	sqn
	0.150519			0.121205	SEM		0.0204526	SEM		0.0290544	SEM		0.0219072	SEM
