# Supplementary material for: Kazrin promotes dynein/dynactin-dependent traffic from early to recycling endosomes
Source: eLife journal article supplement (doi:10.7554/elife.83793), 2023-04-25
Supplement: supp [file FIGURE1-figure supplement1-source data2.xlsx]

## Sheet: mean Tfn intensity per cell
Tfn	WT	shkaz	shCTR		mean Tfn intensity per cell normalized to the shkaz average value
					WT	shSCR	shkaz
	11.625	32.955	28.765		0.347015	0.858657	0.983731
	17.428	14.454	12.202		0.520239	0.364239	0.431463
	3.542	13.096	30.382		0.105731	0.906925	0.390925
	13.545	28.03	24.571		0.404328	0.733463	0.836716
	15.568	23.502	24.79		0.464716	0.74	0.701552
	12.007	22.445	6.544		0.358418	0.195343	0.67
	27.126	15.111	12.959		0.809731	0.386836	0.451075
	28.374	19.059	15.523		0.846985	0.463373	0.568925
	30.565	17.74	19.511		0.912388	0.582418	0.529552
	23.771	16.704	22.263		0.709582	0.664567	0.498627
	17.8	20.593	17.279		0.531343	0.515791	0.614716
	30.8	43.863	30.594		0.919403	0.913254	1.30934
	23.948	24.917	25.99		0.714866	0.775821	0.743791
	16.713	11.396	21.709		0.498896	0.64803	0.340179
	13.59	62.131	14.359		0.405672	0.428627	1.85466
	10.715	59.669	16.708		0.319851	0.498746	1.78116
	7.896	44.268	27.18		0.235701	0.811343	1.32143
	10.049	61.207	16.514		0.29997	0.492955	1.82707
	12.914	55.539	16.404		0.385493	0.489672	1.65788
	10.498	52.488	9.838		0.313373	0.293672	1.56681
	11.339	51.95	13.802		0.338478	0.412	1.55075
	12.059	53.565	26.151		0.35997	0.780627	1.59896
	25.439	45.963	26.185		0.759373	0.781642	1.37203
	17.185	42.306	21.964		0.512985	0.655642	1.26287
	32.881	33.389	31.37		0.981522	0.936418	0.996687
	25.364	41.532	25.974		0.757134	0.775343	1.23976
	9.869	22.324			0.294597		0.666388
	5.592	32.68			0.166925		0.975522
	13.053	17.653			0.389642		0.526955
	16.148	30.203			0.48203		0.901582
	14.707	27.339			0.439015		0.81609
	25.341	32.641			0.756448		0.974358
	18.427				0.55006
	7.054				0.210567
average	16.8509	33.4598	20.7512

## Sheet: Tfn perinuclear enrichment
wt	shSCR	shKaz		wt	shSCR	shKaz		Tfn perinuclear enrichment normalized to average value of the shKaz treated cells
18.7718	9.52766	16.3749		1.85126	0.939611	1.61488
33.7359	15.7864	12.1688		3.32701	1.55684	1.20008
21.1517	11.8458	7.16102		2.08597	1.16823	0.706215
29.2051	12.3781	6.70168		2.88019	1.22072	0.660916
10.7633	18.1894	5.25015		1.06147	1.79383	0.517766
12.5749	14.5406	8.44581		1.24013	1.43399	0.83292
18.3623	38.3415	5.94583		1.81087	3.78121	0.586374
13.9107	17.6793	3.47046		1.37187	1.74352	0.342254
14.833	27.5759	11.6941		1.46282	2.71952	1.15326
22	15.5632	13.1725		2.16963	1.53483	1.29906
11	20.7658	14.3389		1.08481	2.04791	1.41409
19	26.4144	15.7239		1.87377	2.60497	1.55069
17	29.8982	10.6046		1.67653	2.94854	1.04582
19	30.4497	8.60257		1.87377	3.00293	0.84838
	15.6576	12.4528			1.54414	1.22809
	36.2174				3.57173
	13.4839				1.32977
18.6649	20.8421	10.1405	average
