# Supplementary material for: Kazrin promotes dynein/dynactin-dependent traffic from early to recycling endosomes
Source: eLife journal article supplement (doi:10.7554/elife.83793), 2023-04-25
Supplement: supp [file FIGURE1-figure supplement4-source data.xlsx]

## Sheet: Mean Tfn intensity per cell
Tfn accumulation normalized to the average value of the kazKO cells
wt	KO		WT norm	KO norm
8.13	8.21		0.985455	0.995152
9.3	9.64		1.12727	1.16848
10.26	13.5		1.24364	1.63636
15.67	15.68		1.89939	1.90061
2.15	2.43		0.260606	0.294545
1.15	1.24		0.139394	0.150303
7.81	8.99		0.946667	1.0897
10.39	10.52		1.25939	1.27515
10.72	12.43		1.29939	1.50667
15.82	19.31		1.91758	2.34061
2.18	2.38		0.264242	0.288485
1.26	1.24		0.152727	0.150303
7.48	5.86		0.906667	0.710303
10.23	6.45		1.24	0.781818
9.24	7.36		1.12	0.892121
14.03	11.27		1.70061	1.36606
2.17	2.38		0.26303	0.288485
1.16	1.14		0.140606	0.138182
8.55	7.8		1.03636	0.945455
12.72	12		1.54182	1.45455
9.27	8.98		1.12364	1.08848
24.39	20.52		2.95636	2.48727
2.08	2.33		0.252121	0.282424
1.35	0.97		0.163636	0.117576
5.92	8.39		0.717576	1.01697
7.16	9.6		0.867879	1.16364
9.26	11.91		1.12242	1.44364
11.67	17.44		1.41455	2.11394
2.09	2.41		0.253333	0.292121
1.5	1.23		0.181818	0.149091
5.65	6.76		0.684848	0.819394
7.21	8.82		0.873939	1.06909
9.05	9.85		1.09697	1.19394
12.45	14.3		1.50909	1.73333
2.14	2.27		0.259394	0.275152
1.42	1.12		0.172121	0.135758
7.13	7.91		0.864242	0.958788
9.17	10.51		1.11152	1.27394
11.53	12.93		1.39758	1.56727
18.23	15.57		2.2097	1.88727
2.07	2.31		0.250909	0.28
1.08	1.04		0.130909	0.126061
6.51	7.52		0.789091	0.911515
8.07	8.76		0.978182	1.06182
9.36	11.65		1.13455	1.41212
12.36	14.96		1.49818	1.81333
2.03	2.31		0.246061	0.28
1.24	0.98		0.150303	0.118788
8.82	6.76		1.06909	0.819394
11.37	8.9		1.37818	1.07879
9.89	10.39		1.19879	1.25939
12.38	15.37		1.50061	1.86303
2.04	2.28		0.247273	0.276364
1.25	0.91		0.151515	0.110303
8.78	6.99		1.06424	0.847273
12.03	9.55		1.45818	1.15758
11.28	11.63		1.36727	1.4097
14.45	36.99		1.75152	4.48364
2.04	2.28		0.247273	0.276364
1.24	0.83		0.150303	0.100606
7.65	7.09		0.927273	0.859394
10.83	9.7		1.31273	1.17576
9.92	12.34		1.20242	1.49576
14.5	23.19		1.75758	2.81091
2.07	2.25		0.250909	0.272727
1.4	0.84		0.169697	0.101818
5.51	7.12		0.667879	0.86303
8.33	9.98		1.0097	1.2097
9.65	10.42		1.1697	1.26303
21.05	17.85		2.55152	2.16364
2.06	2.23		0.249697	0.270303
0.9	0.95		0.109091	0.115152
6.84	8.09		0.829091	0.980606
11.05	12.4		1.33939	1.50303
9.73	11.9		1.17939	1.44242
22.46	19.51		2.72242	2.36485
2.09	2.28		0.253333	0.276364
1.46	0.83		0.17697	0.100606
8.04	7.12		0.974545	0.86303
13.43	8.2		1.62788	0.993939
9.85	10.04		1.19394	1.21697
22.81	16.53		2.76485	2.00364
2.06	2.2		0.249697	0.266667
0.95	0.98		0.115152	0.118788
6.87	10.14		0.832727	1.22909
9.08	10.37		1.10061	1.25697
10.68	12.01		1.29455	1.45576
16.16	14.98		1.95879	1.81576
2.02	2.28		0.244848	0.276364
1.07	0.87		0.129697	0.105455
7.6	8.53		0.921212	1.03394
10.42	9.64		1.26303	1.16848
11.96	9.29		1.4497	1.12606
17.49	11.32		2.12	1.37212
2.06	2.23		0.249697	0.270303
1.21	1.05		0.146667	0.127273
7.68	8.84		0.930909	1.07152
9.71	13.62		1.17697	1.65091
8.92	12.1		1.08121	1.46667
14.6	16.42		1.7697	1.9903
2.08	2.22		0.252121	0.269091
1.33	1.07		0.161212	0.129697
6.06	7.09		0.734545	0.859394
7.13	8.83		0.864242	1.0703
9.2	9.65		1.11515	1.1697
13.6	13.59		1.64848	1.64727
2.04	2.15		0.247273	0.260606
1.12	1.45		0.135758	0.175758
5.71	7.33		0.692121	0.888485
7.38	10.72		0.894545	1.29939
9.09	9.32		1.10182	1.1297
15.98	20.21		1.93697	2.4497
2.06	2.14		0.249697	0.259394
1.13	1.02		0.13697	0.123636
7.74965	8.2507	average
