# Supplementary material for: Kazrin promotes dynein/dynactin-dependent traffic from early to recycling endosomes
Source: eLife journal article supplement (doi:10.7554/elife.83793), 2023-04-25
Supplement: supp [file FIGURE1-figure supplement5-source data.xlsx]

## Sheet: Hoja1
WT	kazKO		RAB11 perinuclear enrichment normalized to the average value of kazKO cells
1.21749	0.597514
0.513182	0.608453
0.839285	0.754674
0.95667	1.10375
0.456563	0.601995
0.566038	0.505718
0.778285	0.746785
0.914478	1.16265
0.863863	0.424475
0.510251	0.742039
0.847787	0.857547
1.54901	1.65745
0.839145	1.26332
1.60661	2.40119
0.831302	0.72145
1.78864	0.938618
0.525961	0.672134
1.37702	0.866503
1.05717	1.15013
0.405147	0.430694
1.08252	1.44841
1.0589	1.29026
0.604899	1.07882
0.398248	0.528713
1.33965	1.51462
1.15264	1.21513
1.433	1.15141
1.41035	1.38454
1.07861	1.18102
0.98455
0.651032
0.895453
0.812427
1.32993
0.926786
0.788373
0.480077
0.481447
0.359688
1.70066
0.974748
1.80998
1.62893
1.19345
1.48185
1.26533
0.937411
1.53174
0.347109
1.24979
