# Supplementary material for: Kazrin promotes dynein/dynactin-dependent traffic from early to recycling endosomes
Source: eLife journal article supplement (doi:10.7554/elife.83793), 2023-04-25
Supplement: supp [file FIGURE1-source data.xlsx]

## Sheet: 1B perinuclear enrichment
WT	kazKO	GFP	GFP-kazrin		TxRTfn perinuclear enrichment
1.84893	1.35606	1.47651	1.52695
1.83544	1.54826	1.85625	1.09467
1.42668	1.07302	1.44366	2.40678
1.39478	1.39005	1.60976	1.47799
1.46575	0.959543	2.17277	1.82212
1.99091	1.18116	1.59677	1.67089
1.4888	1.70775	1.11039	1.78226
1.75699	1.50537	1.45517	0.951456
1.66667	1.27895	2.12857	3.55714
1.98828	1.918	1.66129	2.94805
1.7829	1.22399	1.80383	1.21101
2.22053	1.64361	1.48438	1.92105
1.52902	1.08704	1.84762	1.71711
1.54723	1.32249	1.05455	1.60526
2.10071	1.50067	1.32243	1.7931
1.96673	1.31564	1.72472	1.728
1.59362	1.56171	1.14286	1.48515
2.2893	1.36083	1.21429	2.31544
1.88201	1.58079	2.1422	1.85897
1.05679	1.73761	1.39041	1.91304
1.52958	1.5897	1.58209	1.3625
1.68352	1.54962	1.19469	1.43871
2.14047	1.24611	1.58716	1.27119
1.30774	1.90012	1.56552	2.42188
2.32769	2.02244	1.5	1.7284
1.53197	1.80736	1.01515	1.68182
1.63463	1.69829	1.38164	1.53623
1.78706	1.56881	1.29412	1.52518
1.94144	1.33596	1.74627	1.82812
1.26549	1.87595	1.78916	2.05042
1.91179	0.950431	1.20084	1.31538
2.25029	1.62812	1.6	1.50336
1.67152	2.22391	0.882682	1.84211
1.6216	1.49883	1.97861	1.24167
2.13181	1.23624	1.96835	1.59606
1.89709	1.40806	1.53416	1.84615
1.78563	1.56909	2.02581	2.05839
1.8266	2.07812	1.40104	1.63566
1.56912	1.33683	1.25238	2.74359
1.66949	1.44808	1.64912	1.94521
1.83337	1.26693	1.61194	1.64286
1.0695	1.47854	1.6165	2.592
1.78237	1.64846	1.32673	1.81897
1.33105	1.01871	1.01075	1.66061
2.37036	1.51529	1.21162	1.38983
1.6305	1.46876	0.864198	1.685
1.60331	1.26415	1.60976	2.37821
1.86896	2.16512	1.63333	1.61783
1.98288	1.28809	1.64122	2.42132
2.18061	2.34176	1.17526	2.46835
2.07325	1.45385	1.85648	1.98742
1.39	1.6441	1.47321	2.02174
1.11556	1.34769	1.95031	2.07767
1.67127	1.42706	1.375	1.37984
1.9487	1.44794	1.10084	1.82734
1.81222	1.54455	1.49107	1.35537
1.63546	1.43768	1.84184	1.33136
1.78483	1.21912	1.92398	1.42718
1.672	1.45698	1.63525	1.50575
1.95224	1.23218		1.5679
1.32771	1.51972		1.55801
2.34485	1.59202		1.63433
1.91909	1.1563		1.4
1.85951	1.26656		2.69427
1.70861	1.33447		2.37624
1.58653	1.14752		1.81507
2.09444	1.5371		2.32597
1.4835	1.49384		1.79151
	1.80063		1.72021
	1.60969		1.63861
	2.0799		1.55747
	2.0913		2.07328
	2.15841
	1.67969
	1.42999
	1.43741
	1.22317
	1.7018
	1.32345
	1.25798
1.75514	1.50916	1.52774	1.80694

## Sheet: 1D WT kazKO
WT	kazKO		EEA1 perinuclear enrichment normalized to the average value of kazKO cells
0.722876	1.57739
0.929352	0.832324
1.05675	0.619396
1.17771	1.01926
1.52388	0.627048
1.93332	0.473625
1.43363	1.66421
1.11987	0.68308
1.2501	1.14336
1.56013	1.28888
1.39378	1.19593
1.27467	1.03858
1.14603	1.20708
1.1079	1.33668
1.0617	0.63011
1.40044	0.861561
1.04758	0.777706
1.02717	0.900181
1.26772	1.05206
1.60774	1.33449
2.43771	0.664711
1.07018	0.733893
1.20139	0.802592
0.861959	0.544781
1.45888	1.67827
0.881322	1.39895
1.31882	0.510986
0.676626	0.884912
0.586683	0.851662
1.289	1.66629
1.17521	0.876303
1.29126	1.56437
0.58929	1.05728
0.949626	1.20189
1.02109	0.79507
1.03796	1.51831
0.463993	2.00033
1.40071	1.21757
1.79743	2.3677
1.03743	0.957926
1.37434	0.546075
0.585633	0.948557
1.74605	0.806551
0.682178	0.542193
0.85399	0.780483
1.21357	0.406902
2.03725	0.754107
1.0331	1.01767
1.01491	0.598756
0.80498	0.316038
0.699727	0.882098
1.00801	0.940826
1.35089	1.45394
1.99447	1.09566
1.55328	0.421522
1.48701	0.576317
1.77557	0.646507
1.68942	0.742217
1.93842	0.751334
1.70566	2.66811
0.603622	0.547384
1.17468	0.810583
2.11939	1.14459
0.656716	1.02665
1.35254	1.12492
0.904454	1.36454
1.36522	1.42244
1.10664	1.20768
1.0968	0.776479
1.00515	1.16206
1.03399	0.810433
0.75457	1.01443
1.09889	0.677911
0.970654	0.457548
1.69283	1.04612
1.3554	1.29185
1.28902	1.18896
0.654469	0.91827
1.65109	0.698574
1.62249	0.855955
2.4052
2.20181
1.56694
1.15614
1.34597
1.22251
3.23948
2.17197
0.751268
0.920037
1.1829
1.18668
0.988362
1.54255
1.66489
1.62188
1.30748
1.20059
1.25786
1.42701
1.59136
1.28807
1.15646
0.536158
1.30306
1.09359
2.01203
1.03682
1.92631

## Sheet: 1D GFP GFP-kazrin C
GFP	GFP-kazrin		EEA1 perinuclear enrichment normalized to the average value of kazKO GFP cells
0.922455	1.31014
1.78033	1.4764
1.01011	1.67354
1.2442	1.94383
0.451604	2.06765
0.871273	0.973506
1.76498	1.36243
0.439309	1.57232
0.836069	1.05063
2.0935	1.45895
1.58719	2.4169
2.75334	1.35535
1.37444	0.654845
0.779624	1.71316
0.771962	0.542358
1.36155	0.595957
0.615164	0.747805
0.785557	0.652883
1.56954	0.815484
0.297258	0.366499
0.316106	1.11632
0.807993	0.336425
1.11629	2.02339
0.93799	1.92627
0.871292	0.815613
1.27532	1.43499
0.878729	0.786937
1.33167	1.92398
0.865413	1.43002
1.16359	1.31911
0.397072	1.60677
0.938684	1.28886
0.603049	1.6759
0.452408	1.26754
1.39202	1.59981
0.37591	1.32039
1.09295	0.47688
0.644697	0.384049
0.820583	0.65418
0.408786	1.62823
0.414974	1.80599
1.04539	0.708279
0.50509	0.593751
0.332396	0.863777
0.717608	0.651737
0.672999	1.12743
1.30967	0.531494
1.17013	0.746405
0.821492	1.06162
1.25361	1.09306
1.15507	0.77908
1.01131	0.79299
2.51223	0.98067
0.970822	0.69772
1.07866	0.951953
1.83474	1.54645
1.06887	0.708842
0.802106	0.820978
0.876655	0.817028
0.937625	1.20256
2.24306	2.18845
1.01161	1.09465
0.730553	1.37899
0.521108	1.7318
0.889048	1.24181
0.809192	0.99515
0.817387	1.84745
1.11265	1.18253
0.373947	1.44469
1.35644	1.45926
0.656984	1.13007
1.05883	1.0343
0.717759	1.18878
0.886715	1.31155
0.78667	0.633147
0.638429	0.90127
0.803092	0.801492
0.843376	1.54612
0.574859	0.970406
1.62033	1.05845
1.26438	0.720215
0.777505	0.994705
1.58594	0.923127
1.66048	1.59935
1.19441	0.78644
0.8249	1.0417
1.19484	1.13019
1.06299	1.13557
0.682076	1.09036
0.894514	1.05196
0.765187	0.93817
1.39137	1.49494
0.818325
0.949553
0.927492
1.1371
0.925454

## Sheet: 1E
	WT
0	104.85	93.6	90.35	92.68	89.85	81.62	89.03	95.25	86.18	72.69	87.76	89.28	86.84	87.27	82.75	87.4	80.44	84.79	73.46	71.79	89.71	78.01	87.26	93.87	87.79	100.25	84.67	85.31	83.94	96.72	94.33	87.21	64.69	71.63	90.63	86.5	82.53	74.35	76.53	84.01	83.48	79.91	82.65	89.25	95.82	92.68	81.67	72.18	109.16
7.5	71.89	71.68	81.69	78.32	97.99	73.99	71.18	68.81	83.08	69.81	71.13	73.67	79.25	82.85	72.97	74.55	78.07	83.76	85.41	66.44	66.9	61.67	73.28	78.71	73.07	71.49	75.02	70.32	82.1	75.66	68.02	74.52	80.58	76.44	62.43	72.43	71.73	66.34	69.65	78.93	82.66	75.6	71.53	75.98	64.8	77.95	76.42	78.92	67.33
10	71.19	69.6	68.04	66.54	62.28	64.92	63.07	67.92	59.35	65.81	64.2	68.58	68.64	67.1	64.08	64.98	70.49	66.18	63.65	65.48	66.02	68.97	74.19	63.27	57.06	70.45	70.77	58.41	67.55	68.21	66.12	67.49	63.65	58.83	59.93	59.32	65.56	62.92	61.8	53.25	56.14	63.78	67.38	65.96	65.79	65.73	65.66	60.99	62.92
20	0	0	0	51	0	55.7	55.38	57.62	0	0	0	0	0	0	0	0	0	53.43	61.73	0	53	56
[truncated: 297 more columns]
