# Supplementary material for: Kazrin promotes dynein/dynactin-dependent traffic from early to recycling endosomes
Source: eLife journal article supplement (doi:10.7554/elife.83793), 2023-04-25
Supplement: supp [file FIGURE2-figure supplement1-source data.xlsx]

## Sheet: S2A WT kazKO
WT	kazKO
0.734694	1.24485
1.30434	0.664722
1.33626	0.221188
1.0357	0.571397
0.153872	1.40114
0.466148	1.0443
0.722706	1.48042
0.117981	0.575879
1.63009	1.17907
0.551176	0.178776
0.350049	0.725916
1.44047	0.408208
1.25379	1.5214
0.988636	1.12998
0.123574	0.533665
1.00976	1.38505
0.227424	1.34453
1.28695	1.66552
0.739593	1.07006
0.387187	1.3919
0.241102	0.824442
1.05825	0.618349
0.207445	0.681711
0.176744	1.66108
0.570544	1.23876
1.15405	0.669965
0.843355	1.28067
0.316977	1.37067
0.753867	1.50986
1.23141	1.44545
0.357899	0.655416
0.455706	1.62557
1.09475	0.874795
0.249611	1.06279
0.887766	1.26326
0.549775	0.549195
1.36334	0.908366
1.00614	1.64325
1.18553	0.820183
1.3814	1.32721
0.0900233	1.75219
0.813238	1.44928
0.776256	1.13824
0.718967	0.450692
1.31503	1.35081
0.970537	1.35172
0.742997	1.23038
1.26298	1.47498
0.505426	0.781111
1.47643	0.639871
0.437624	0.702847
1.42434	1.13738
1.11467	0.824969
0.980299	1.4898
1.28796	0.929943
1.53511	1.44361
1.2248	0.472665
1.47977	0.414633
0.930671	1.69893
0.981852	1.44455
0.309316	1.15379
0.0987941	1.36707
1.29746	0.782364
1.46264	0.917994
0.634832	1.45044
0.389706	1.08076
0.163883	1.05566
1.02289	1.44292
1.46288	1.1237
0.440304	1.36759
1.02884	1.41396
0.75926	1.42408
0.369394	0.996099
0.110612	0.500428
0.947664	1.04067
0.807661	1.63852
1.5216	0.438062
1.30123	0.919605
0.370751	0.76624
1.0697	1.28041
0.523165	1.29617
0.831045	0.646703
0.607266	0.841832
0.258555	0.850635
1.71459	1.24613
0.77078	0.448272
0.82924	1.40465
1.62501	0.526091
1.5934	0.576016
1.40452	1.40291
0.917429	1.35456
1.29872	0.948327
0.324318	1.23324
1.17311	0.989047
0.530926	1.65108
0.138601	1.04926
1.44461	1.01585
0.61606	1.01708
0.161442	1.56898
0.538875	0.189933
0.945985	0.881766
0.530461	0.547295
0.649264	0.147963
0.766504	0.78046
1.03266	0.548115
0.119211	1.07954
0.196824	0.9663
0.656262	0.851579
0.296817	1.02321
0.819865	0.774664
0.927698	1.43132
0.199617	0.965949
0.646059	0.988167
0.983743	1.0033
0.842337	0.0720942
1.04065	0.508292
0.0556394	0.391147
0.275672	0.405858
0.0167946	0.208812
0.132631	0.998123
1.0477	1.09129
0.450114	0.474918
1.15752	1.32673
0.167053	1.44752
0.28361	1.07551
0.699161	1.68891
0.138454	1.38381
0.685412	0.831113
0.252272	0.947218
0.409813	1.5525
0.435101	0.743422
0.13296	1.19044
0.631888	0.911349
0.33728	1.30596
1.19495	0.910294
0.0520296	0.875614
0.616295	0.921168
0.184335	1.29993
0.371722	1.50567
0.17763	0.914841
0.364122	1.79057
0.449105	0.524188
1.49336	1.69464
0.683346	1.59775
1.10941	0.389882
1.31566	0.290017
1.26239	0.0963366
0.937158	0.898539
1.56718	1.14699
1.25686	1.47777
1.54213	1.08661
0.916323	1.4281
0.381223	1.30206
0.784696	1.5819
0.125434	1.2379
1.43828	1.00413
0.418323	0.863736
1.60275	0.224089
0.596384	0.660851
1.10925	1.14566
1.11387	1.09856
0.759678	0.612951
1.12818	0.292666
1.54299	1.41376
0.894883	0.189416
1.2639	0.973979
0.981694	1.58522
1.23989	0.645419
1.66089	1.22198
1.12504	1.20497
0.823577	0.640277
0.673325	1.25918
1.45619	0.931306
0.70477	1.48274
0.731399	0.46817
0.479377	0.999416
0.945376	0.471742
0.510165	0.408356
1.18104	1.49811
0.720301	1.01519
0.753492	0.832195
0.339717	0.374043
0.103951	0.961463
1.05516	0.980516
0.333389	0.73469
0.707083	1.60728
1.18582	0.915015
0.624493	0.602746
0.610746	1.13812
0.918833	0.321039
0.726441	0.321636
0.233829	1.2622
0.189907	1.0991
0.570141	1.61612
0.676481	1.37398
0.469853	1.1576
1.25007	0.368364
0.776561	0.857316
1.2573	0.533427
1.56703	0.811596
0.950037	0.901635
1.30193	1.21424
0.939653	1.19175
0.612233	0.446964
0.325895	0.609781
1.27822	0.389397
1.55164	1.43993
0.844272	1.59236
1.12632	0.934333
0.52486	1.20816
0.762855	1.59884
0.9453	1.56128
0.402724	0.248311
1.35215	0.833043
0.215955	1.43023
1.18516	1.0263
0.765398	1.10232
0.301799	1.10048
1.67784	0.383765
1.26005	1.03773
0.13787	0.856428
1.02518	0.839947
0.662777	0.669292
0.729804	1.50096
0.261431	1.49749
0.778915	0.446033
0.540979	0.424899
0.195077	1.66576
0.464643	0.763885
0.730269	1.22898
1.08192	0.795344
0.802831	1.3714
0.908913	1.61264
0.436528	0.58072
0.362075	0.306876
1.41768	1.21132
0.797446	0.347948
0.661873	0.822983
0.258964	1.70992
0.634673	1.14171
0.837262	1.11113
1.2892	1.41677
0.634271	0.0624749
0.30931	0.0598072
0.578828	1.65194
0.493507	1.19777
1.64238	1.39428
1.04804
0.88764
0.941613
0.25543
0.77185
1.01865

## Sheet: S2A GFP GFP-Kaz
GFP	GFP-kazrin
0.321008	0.520843
0.287786	0.772557
0.0323267	1.55652
1.12853	1.20178
0.996684	1.01677
1.29248	0.721741
0.620275	1.18268
0.689647	0.0734077
0.323167	1.64193
0.553819	0.736525
1.0262	0.293671
0.924192	1.49578
0.229333	1.44674
1.08251	0.875396
1.08294	1.09063
0.341408	0.138642
0.70408	0.700014
0.708071	0.710723
0.665811	0.874833
0.234358	0.216838
0.775817	1.54457
1.671	0.23839
1.42039	0.149138
0.247227	1.02112
0.744752	0.341903
1.04571	1.8728
1.67179	0.725147
0.324532	0.856008
1.03219	0.609915
0.65244	0.371267
1.2994	1.0221
0.925246	1.76196
0.571207	1.12538
1.17495	1.1948
1.51443	1.72532
1.00919	1.87901
0.571822	1.49689
1.25166	2.03842
1.32428	1.79787
1.83097	0.310428
0.473733	0.811748
0.912835	0.402764
1.66181	1.48097
1.44616	0.664892
0.890815	0.748229
0.723721	1.62998
1.19445	0.811748
0.556652	1.79848
1.45177	0.604992
1.45177	1.27553
1.85797	1.13307
1.1999	0.298652
1.40732	1.94084
1.47019	1.98987
0.948253	0.730983
1.35294	0.869492
0.439545	0.43493
0.2668	0.515982
1.24061	1.6103
0.310295	1.34485
0.489114	1.15437
1.14127	1.3647
0.547583	0.355899
1.69413	0.57936
1.62148	1.69761
1.20104	1.13942
1.73713	0.153616
1.79838	1.58492
0.431533	1.58492
0.826412	0.712359
1.36153	0.96565
0.405149	1.15506
1.53239	0.843433
0.551335	1.01664
1.06531	0.84068
0.859026	1.812
0.701013	1.09685
0.731069	0.425399
0.173842	1.68987
0.742402	1.68987
0.533019	1.28833
1.70128	1.29706
1.70128	0.570104
1.29359	0.667864
1.99415	0.730563
1.47403	1.87156
0.957721	1.37557
0.462131	1.38654
1.047	0.615058
2.00147	0.763626
1.75791	0.762462
0.778858	1.76928
0.338205	1.76928
0.664589	1.31647
1.48708	1.71402
1.2618	1.52248
0.435188	1.54039
1.1974	0.96872
0.475373	0.195188
1.70917	0.185313
1.66544	0.714901
1.54454	0.428676
1.79646	1.20527
0.340497	1.94078
0.714762	0.582854
0.612452	1.0453
0.786598	1.27793
0.89662	0.813934
1.02638	1.44011
0.781247	1.08818
0.600226	1.0272
0.43444	1.6062
0.735009	1.83825
1.33763	0.730473
1.56027	1.57609
1.30195	0.841931
1.05669	1.66058
1.70457	1.05673
0.79043	1.52217
0.456524	1.04932
0.464107	0.390265
0.587978	0.702969
1.6031	1.05527
0.517469	0.315335
1.3148	1.36394
0.736055	0.025271
0.985462	1.3758
0.720995	0.277504
0.735602	0.652056
0.375834	0.279178
0.799775	1.64227
1.8653	0.615243
1.16936	0.322465
0.7087	0.445187
0.239038	1.4053
0.386793	0.656878
0.604597	0.640904
0.37149	1.34229
1.58911	0.622096
1.78648	1.3721
0.369725	0.698219
0.546797	1.0896
0.743322	1.79868
1.77073	1.69687
1.21217	1.0259
0.367192	1.08345
0.367192	1.18813
1.28773	0.325296
1.94455	1.13277
1.94455	1.02426
1.94455	0.595902
1.25045	1.14744
1.29487	0.431226
1.70821	0.686829
1.81013	0.908478
1.28949	0.85934
	0.257859
	0.254781
	0.857251
	1.06964
	1.07993
	0.602444
	0.513564
	1.5985
	0.320276
	0.780795
	1.14676
	0.861725
	0.660209
	1.84654
	0.279385
	0.717151
	0.76139
	1.69047
	0.489636
	1.61696
	0.948657
	0.58386
	0.35901
	1.31864
	1.76639
	0.490388
	1.85777
	0.85444
	1.08428
	0.376234
	0.957816
	0.913267
	0.318941
