# Supplementary material for: Kazrin promotes dynein/dynactin-dependent traffic from early to recycling endosomes
Source: eLife journal article supplement (doi:10.7554/elife.83793), 2023-04-25
Supplement: supp [file FIGURE2-source data.xlsx]

## Sheet: 1B WT kazKO
WT	kazKO		migration speed normalized to the average value of kazKO cells
0.607934	0.511089
0.260602	0.605353
1.14164	1.13269
1.62914	0.494878
1.11026	0.162709
2.49819	0.191467
2.03177	0.792792
1.08518	0.280102
1.05018	0.28071
0.342236	1.12402
0.742567	0.259854
0.53617	0.391859
0.714093	0.212323
0.628274	0.343575
0.36181	0.45581
0.444988	0.436923
0.278025	0.237941
0.415842	0.534873
1.6571	0.397267
1.73212	0.439493
0.299014	0.353126
0.498826	0.411572
5.02693	0.262341
0.357748	0.589953
0.422004	0.164608
0.947871	0.349325
0.547362	0.579573
0.315402	0.701425
1.94254	0.972164
0.926814	0.297009
0.593882	0.829889
2.79886	1.24889
0.970767	0.937964
0.801048	0.189075
0.833649	0.193206
0.627834	0.706912
1.17778	0.98071
1.01352	1.32726
0.686544	0.931509
0.39081	0.442945
2.45328	0.367876
0.649112	0.390223
1.19519	0.362146
0.348468	0.568151
1.10913	0.39079
0.280217	0.429996
0.469985	0.870004
0.380289	0.840482
2.43515	0.504225
1.38964	0.468728
0.277921	0.205146
0.487304	0.810394
0.317864	0.219478
0.882503	0.208786
0.559747	0.572517
0.944745	0.994551
1.2085	0.227807
0.44611	0.549831
4.48867	0.94535
3.89624	0.654669
0.323214	0.259949
0.404781	0.702057
0.570204	0.466375
0.381306	0.422914
0.536367	0.185464
3.00272	0.76281
3.49376	1.16697
0.508611	0.679575
1.12088	0.113937
0.227059	0.236202
1.08277	0.771955
0.4287	0.866548
0.963744	0.528047
0.511286	0.164742
0.30721	0.121518
0.927963	0.198651
0.446787	0.14434
0.213475	0.384673
0.170545	0.277393
0.748152	0.254212
0.308134	0.207538
0.411842	0.111478
0.987787	0.191493
0.318855	0.164542
1.5594	0.289267
0.984402	0.44827
0.434693	0.199796
0.659529	0.156706
0.871658	0.296584
0.227779	0.352012
0.28333	0.177135
1.76651	0.2404
2.22718	0.73838
0.393502	0.271984
3.43538	0.242206
0.645165	0.307863
0.732534	0.515152
2.66458	0.211736
4.70804	0.605839
0.540259	0.766407
2.07312	0.260978
1.84853	0.344663
2.13919	3.41868
1.07745	0.51239
0.809288	1.55969
3.76921	1.05428
3.2397	1.43734
1.31048	0.958372
2.70803	1.32897
2.73539	0.97024
1.60018	0.715867
4.46276	1.37883
2.11272	1.2343
1.70843	0.840816
2.11517	1.86049
1.8319	0.774862
6.75191	0.564627
5.22732	1.57728
6.41136	1.33028
3.76892	1.15566
1.11281	1.28112
1.11852	0.173591
2.1768	1.46381
4.64801	1.03341
3.052	1.09704
4.38669	2.0465
4.18807	1.13498
1.66486	1.68788
3.54461	0.157969
0.897004	1.94618
4.30359	1.44031
7.81562	0.960623
1.30084	2.3901
3.85385	1.96819
1.9382	1.70712
0.768601	2.40139
2.1764	1.61309
6.01916	0.659688
0.699273	1.18633
3.83592	1.00088
3.03217	1.92188
4.25946	0.517019
1.71525	1.74369
1.0602	1.29467
1.4857	1.92062
1.13146	0.875703
1.8895	1.75751
1.22024	2.17754
1.37672	1.43583
0.628655	1.39095
1.32198	2.01743
1.75066	1.15928
5.57895	0.992654
1.33979	1.89656
5.74617	0.959799
2.18332	1.55446
1.54442	1.20082
0.971185	0.778754
1.94877	1.23029
1.11245	1.55187
1.95314	1.4872
2.10615	1.782
1.26949	5.99255
0.675544	1.08482
1.40822	2.10808
1.27078	0.891117
1.34592	1.20654
2.26757	0.542746
0.78711	0.821115
0.824667	1.42701
1.14745	0.420691
1.11478	1.87273
0.875122	1.81931
0.721914	0.974314
2.30062	0.769758
2.80945	1.11163
4.00493	1.38559
0.997292	1.32732
1.34713	1.84412
4.19244	0.563237
1.04864	1.31893
1.49767	1.49475
8.18396	1.12105
1.84364	0.605864
3.57395	0.910875
4.67686	2.04012
1.80612	1.08924
1.19041	0.496533
1.51913	1.16717
1.95543	1.47399
1.51485	1.82813
1.99936	1.28238
0.568258	1.54133
2.84095	1.51685
1.95467	1.06378
2.756	1.31271
2.66128	2.56926
0.506903	0.883151
1.25889	0.341269
2.82624	1.71545
2.69672	2.32948
1.81183	1.14181
1.49291	0.673859
4.14857	0.066964
1.69336	1.56599
1.56296	1.87005
0.992927	1.89153
1.63566	1.54988
1.76658	1.58485
3.17077	1.18622
0.740236	1.50183
1.07132	1.23221
6.74962	2.66254
3.43884	1.20769
0.438279	0.827816
1.00568	1.30185
3.25393	0.862847
3.08059	1.23852
2.09004	0.977143
1.5151	1.39212
5.32177	1.0565
1.54945	1.27728
2.54202	2.06132
2.05699	1.39022
5.39998	1.46224
1.57724	0.607612
0.52191	1.18073
7.37216	0.752257
2.17957	1.71854
4.84379	1.88538
2.7229	0.825296
2.37474	0.89715
1.40936	1.78493
3.13959	0.507578
0.66641	1.65799
1.74954	1.61072
2.42588	1.53145
1.68829	1.58056
0.577854	1.66609
3.11371	1.12719
1.01608	0.915802
2.26414	1.24653
1.60502	2.39515
4.72934	2.12323
3.27014	1.57318
0.644659	1.88927
2.86994	1.46027
2.32731
1.53552
1.37886
1.99537
1.64873
1.45871

## Sheet: 1B GFP GFP kaz
GFP	GFP-kazrin		migration speed normalized to the average value of kazKO GFP cells
2.4455	1.28206
2.38317	2.26328
1.90245	1.21843
0.311311	1.14962
1.68493	0.934294
0.840169	1.08636
2.02334	1.07097
1.59546	0.936672
2.46421	2.06665
0.975054	2.04024
0.970473	0.90074
0.678961	2.20176
1.51721	2.62412
1.63123	1.77342
1.55136	3.28532
0.675446	0.701376
1.20818	1.84434
1.12933	1.81963
1.88486	1.74019
0.830132	1.2942
0.958782	1.81626
1.38067	1.38954
2.63069	1.48748
1.02594	0.931414
0.665894	1.61909
0.661734	0.88132
0.543559	2.61543
1.03487	1.57762
1.76407	1.08303
1.68075	1.51672
1.02549	0.385624
0.706681	1.07956
1.37916	1.65427
0.836446	1.0945
0.801112	1.16491
1.10766	0.811689
0.981453	1.31119
0.831484	1.40933
0.596337	2.3874
1.73429	1.34585
0.598439	1.59533
0.45828	0.76827
0.438948	1.04356
2.0289	1.61988
1.03189	0.702992
0.950271	1.17533
1.27924	1.59533
1.12695	1.49573
1.36903	2.73357
1.36903	0.640925
1.73301	0.41223
1.03168	0.784361
1.7496	1.32114
1.2243	2.01316
0.632459	1.60902
0.488224	3.75254
0.720411	0.9487
0.587686	1.3531
1.0763	0.972388
0.634543	2.66272
1.15942	1.11326
0.930825	2.85428
0.251136	2.1261
2.17045	0.831326
0.170721	1.51921
0.36237	1.48654
0.518288	1.20104
0.716251	1.0593
0.783832	1.0593
0.619401	1.27564
0.921439	0.908987
1.0498	1.07836
0.911178	1.98882
0.725227	0.589952
0.917066	0.913369
1.70587	1.80356
1.15913	0.501591
0.679745	0.969954
0.796188	0.598729
0.185234	0.598729
0.580526	0.905905
1.64726	2.01316
1.64726	0.471846
0.722151	0.907167
1.64972	2.36707
0.977756	1.51652
0.67741	0.503103
0.804832	1.82377
0.941956	1.43187
1.18443	1.32111
1.73964	1.46346
1.16366	1.18149
0.695745	1.18149
0.833059	1.33346
1.17759	0.881661
0.981046	1.06574
0.473995	1.46844
0.976413	1.98373
0.596375	2.29428
0.41201	1.26939
0.679089	0.838863
0.467528	1.62853
1.06878	1.64371
0.255432	1.53113
0.626619	1.2762
0.573743	1.07473
0.668637	0.326921
1.48611	0.63371
0.731684	1.1075
0.590529	1.4169
0.652228	1.07883
0.382737	1.17799
0.83686	2.32331
0.918347	0.830674
0.74099	0.446798
0.444004	2.5229
0.395375	1.15518
1.76606	0.683348
0.941135	1.25473
0.869246	1.67129
0.596459	3.471
0.470802	4.12337
0.122103	0.897856
0.807234	0.327025
1.35392	1.65878
0.668524	1.82379
0.355846	1.30431
0.778473	0.847677
1.26052	0.806697
1.16459	0.826367
1.00947	1.71357
0.797621	0.927457
0.435707	0.809306
0.938878	1.62197
1.12535	1.91758
0.377159	2.76687
1.25844	0.839386
0.633407	1.08527
0.663286	1.21634
1.94421	1.80753
1.63861	1.83586
1.81405	1.74369
0.707082	1.75467
0.391655	2.42502
0.494758	0.526371
0.976878	1.28093
0.976878	2.2075
0.974556	0.401053
0.980743	0.994299
0.980743	0.327893
0.980743	0.665934
0.368923	2.51103
0.828676	1.1169
0.993036	0.808778
1.59969	0.611532
1.24042	0.807037
	0.400042
	0.53975
	2.43043
	1.20083
	1.22407
	0.938565
	1.4401
	1.87152
	3.19824
	1.33306
	4.28065
	3.35279
	1.18796
	1.85118
	2.21252
	1.73095
	0.669271
	2.08
	1.63796
	1.4401
	1.48142
	1.53421
	1.21228
	1.55402
	0.90809
	0.387794
	1.69975
	0.916294
	2.03608
	2.84408
	2.09841
	0.965099
	1.94077

## Sheet: 1D WT kazKO
WT	kazKO
0.682692	0.398237		separation time normalized to the kazKO average value
1.59295	1.47917
0.227564	1.59295
0.455128	1.59295
0.170673	0.512019
1.53606	0.341346
0.113782	1.53606
0.284455	1.42228
0.56891	1.53606
1.53606	1.59295
0.398237	1.59295
0.227564	2.73077
0.170673	1.53606
0.455128	0.455128
0.227564	0.625801
0.113782	0.170673
0.056891	0.682692
0.910256	0.398237
0.170673	1.2516
0.512019	0.682692
0.227564	0.398237
0.227564	1.53606
0.113782	3.41346
0.113782	0.512019
0.284455	0.625801
0.398237	0.739583
1.2516	0.853365
1.64984	0.398237
0.170673	1.47917
3.75481	2.5601
0.56891	0.56891
0.682692	0.739583
0.170673	0.56891
0.398237	0.853365
0.113782	2.61699
0.056891	0.284455
0.170673	1.93429
0.284455	0.113782
0.56891	1.99119
0.341346	1.93429
0.512019	0.625801
0.113782	0.512019
0.056891	0.113782
0.512019	0.967147
0.113782	2.95833
0.113782	1.02404
0.113782	0.227564
0.227564	0.455128
0.170673	0.56891
0.455128	0.739583
0.227564	0.56891
0.113782	0.455128
0.113782	2.27564
0.056891	1.99119
0.113782	0.170673
0.56891	0.796474
0.227564	1.08093
0.853365	0.398237
0.113782	2.16186
0.227564	0.455128
0.284455	0.113782
0.398237	1.59295
1.47917	0.398237
0.625801	0.284455
0.512019	0.455128
0.341346	0.341346
0.227564	0.739583
0.341346	0.796474
1.30849	0.455128
	0.455128
	0.56891

## Sheet: 1D GFP GFPkazrin
GFP	GFP-kazrin
0.90573	0.422674		separation time normalized to the kazKO GFP average value
2.11337	0.362292
0.60382	0.120764
1.75108	0.181146
0.30191	0.060382
0.60382	0.422674
0.241528	0.30191
0.241528	2.17375
1.63031	1.20764
0.120764	0.30191
0.30191	0.181146
0.060382	0.30191
1.81146	0.060382
0.30191	0.181146
0.120764	0.966112
0.30191	0.30191
0.362292	0.060382
0.30191	0.181146
0.30191	0.60382
0.422674	0.664202
0.060382	0.241528
0.241528	0.181146
0.60382	0.120764
1.44917	0.120764
0.181146	0.181146
0.422674	0.241528
1.75108	0.120764
0.30191	0.060382
0.241528	0.060382
0.241528	0.120764
0.060382	0.483056
0.483056	1.14726
0.30191	0.724584
0.120764	0.241528
0.30191	2.71719
1.75108	0.724584
0.120764	0.181146
0.362292	0.543438
1.6907	0.60382
1.20764	2.3549
0.483056	0.181146
2.47566	0.30191
0.362292	0.060382
0.181146	0.422674
1.99261	0.845348
1.14726	0.181146
2.59643	0.422674
0.362292	2.3549
1.63031	0.60382
0.543438	0.483056
4.52865	1.26802
0.30191	3.86445
0.664202	2.17375
3.98521	1.08688
4.16636	0.30191
1.87184	0.60382
3.56254	0.241528
0.60382	0.483056
0.120764	3.07948
0.30191	4.28712
1.81146	0.724584
2.47566	0.422674
0.724584	0.483056
4.22674	0.60382
0.60382	0.060382
0.60382	0.664202
0.241528	0.422674
0.30191	0.422674
0.181146	0.60382
0.30191	0.120764
0.664202	0.422674
1.44917	2.53604
0.543438	0.181146
0.30191	0.241528
0.724584	0.241528
1.50955	0.724584
0.664202	0.422674
0.362292	0.60382
3.13986	0.241528
0.362292	0.120764
0.422674	0.422674
0.30191	0.422674
1.3284	0.422674
0.483056	0.120764
0.784966	0.543438
0.483056	0.181146
0.543438	0.181146
0.543438	0.181146
1.20764	0.543438
0.422674	0.90573
2.89834	0.362292
0.724584	0.362292
2.89834
2.11337
1.87184
1.99261
0.120764
1.08688
