# Supplementary material for: Kazrin promotes dynein/dynactin-dependent traffic from early to recycling endosomes
Source: eLife journal article supplement (doi:10.7554/elife.83793), 2023-04-25
Supplement: supp [file FIGURE4-figure supplement3-source data.xlsx]

## Sheet: Hoja1
microns to the nearest EE
GFP-kazrin C	GFP-kazrin C-Nt
0.15	0.34
0.365	0.935
0.325	0.395
0.6	0.625
0.7	0.575
0.35	1.055
0.3	0.695
0.35	0.62
0.5	0.575
0.5	0.64
0.5	0.7
0.5	1.5
0.37	1.015
0.265	0.965
0.33	1.55
0.33	0.91
0.545	1.175
0.53	0.662
0.52	0.552
0.32	0.903
0.62	0.58
0.265	0.84
0.361
0.47
0.33
