# Supplementary material for: Kazrin promotes dynein/dynactin-dependent traffic from early to recycling endosomes
Source: eLife journal article supplement (doi:10.7554/elife.83793), 2023-04-25
Supplement: supp [file FIGURE5-figure supplement2-source data.xlsx]

## Sheet: Hoja1
	GFP	GFP-Kazrin C	GFP-KazrinC-MTD	GFP	GFP-Kazrin C	GFP-KazrinC-MTD
	4.26966	1.65594	18.0696	1.40449	0.544716	5.94394
	6.40519	2.21878	5.43653	2.10697	0.729861	1.78833
	2.33125	6.92431	5.92976	0.76686	2.27773	1.95058
	1.35435	2.46311	9.64313	0.445511	0.810233	3.17208
	1.61007	3.29532	3.61573	0.52963	1.08399	1.18939
	1.21037	2.60228	5.24486	0.398147	0.856013	1.72528
	4.01784	5.07767	7.66847	1.32166	1.67029	2.52252
	2.33348	5.47186	5.33762	0.767592	1.79995	1.7558
	2.63389	3.31919	9.89945	0.866411	1.09184	3.2564
	2.73047	7.88548	2.333	0.898182	2.59391	0.767433
	3.25985	3.4524	8.4626	1.07232	1.13566	2.78375
	4.84746	4.04444	4.71767	1.59456	1.33041	1.55187
	2.82308	3.0678	5.41201	0.928645	1.00914	1.78027
	4.2506	1.90613	7.23387	1.39822	0.627016	2.37956
	2.87671	2.14683	10.6016	0.946287	0.706193	3.48738
	2.52074	4.26367	5.50612	0.829191	1.40252	1.81122
	2.60243	3.08101	3.00296	0.856063	1.01349	0.987817
	2.13305	2.04313	3.81065	0.701661	0.672081	1.2535
	4.04085	4.90984	5.73427	1.32923	1.61508	1.88627
	3.37312	3.55861	1.90196	1.10958	1.1706	0.625645
	2.20106	1.4886	5.72998	0.724033	0.489672	1.88486
	2.5682	3.60593	3.72939	0.844803	1.18616	1.22677
	3.82332	3.68094	10.0136	1.25767	1.21083	3.29395
	2.07912	2.85634	6.2268	0.683921	0.939586	2.04829
	2.25019	4.01379	5.1979	0.740193	1.32033	1.70984
	2.76658	1.33661	11.3465	0.910059	0.439675	3.73239
	1.78912	3.88346	8.76156	0.588525	1.27745	2.88209
	2.78267	2.85813	7.37962	0.915351	0.940173	2.42751
	3.15804	3.93595	4.42048	1.03883	1.29472	1.45411
	2.70225	5.10735	16.6657	0.888898	1.68005	5.48215
	2.9333	3.13156	3.86382	0.9649	1.03012	1.27099
	1.61978	2.41798	7.77971	0.532822	0.79539	2.55911
	4.48249	1.36322	3.26446	1.4745	0.448428	1.07383
	2.2791	3.29637	8.56537	0.749705	1.08433	2.81755
	2.33223	3.8961	4.3545	0.767181	1.28161	1.4324
	4.49279	2.80793	6.29016	1.47789	0.92366	2.06913
	5.18157	2.15974	7.67711	1.70446	0.710442	2.52536
	2.3721	3.66921	7.71644	0.780297	1.20698	2.5383
	5.52384	2.35412	5.60171	1.81705	0.774382	1.84267
	1.83155	2.44293	9.68209	0.602483	0.803596	3.1849
	1.4038	2.51977	6.19677	0.461776	0.828871	2.03841
	3.91608	3.96954	3.69501	1.28818	1.30577	1.21547
	4.25141	2.06485	5.69147	1.39849	0.679227	1.87219
	2.33022	3.59526	3.98668	0.766521	1.18265	1.31141
	2.42243	7.39552	7.76547	0.796853	2.43274	2.55443
	4.3138	2.31994	4.5183	1.41901	0.763138	1.48628
	4.21368	4.09894	13.8737	1.38608	1.34834	4.56373
	2.29418	2.80099	4.35977	0.754663	0.921378	1.43414
	3.96972	0.98238	2.888	1.30583	0.323151	0.949998
	5.30337	2.34439	3.07633	1.74453	0.771182	1.01195
	2.66121	3.95387	4.32668	0.8754	1.30062	1.42325
	1.8624	2.53976	1.81246	0.612631	0.835446	0.596203
	5.01393	2.20891	3.24954	1.64932	0.726616	1.06893
	4.0241	3.46686	2.87879	1.32372	1.14041	0.94697
	2.02242	1.7249	2.14386	0.665269	0.567402	0.705216
	1.83424	2.06078	3.68245	0.603369	0.677889	1.21133
	3.16866	1.48315	4.21138	1.04232	0.487879	1.38532
	1.18779	1.48599	5.54811	0.390721	0.488813	1.82504
	3.04023	2.24238	5.89679	1.00008	0.737626	1.93973
	3.03869	1.89746	6.22402	0.999568	0.624164	2.04737
	2.22608	2.22208	10.2843	0.732264	0.730947	3.38299
	3.4977	1.60502	2.13556	1.15056	0.527969	0.702486
	3.8425	1.92101	6.07029	1.26398	0.631911	1.99681
	4.15636	3.58179	4.58559	1.36722	1.17822	1.50842
	4.22829	3.45996	8.10064	1.39089	1.13815	2.66468
	6.65751	4.35786	3.73115	2.18997	1.43351	1.22735
	2.18096	1.74554	3.28477	0.717422	0.57419	1.08052
	4.37555	2.18104	3.53495	1.43933	0.717449	1.16281
	2.96268	3.73911	4.17238	0.974567	1.22997	1.37249
	1.84247	3.95221	7.8672	0.606076	1.30007	2.58789
	3.39977	2.20141	2.99755	1.11835	0.724147	0.986037
	2.08869	1.59675	4.78702	0.68707	0.525246	1.57468
	2.95646	1.28418	4.81917	0.972519	0.422426	1.58525
	3.28243	1.9077	2.53003	1.07975	0.627534	0.832247
	2.50858	1.44658	2.68278	0.825191	0.475849	0.882493
	1.69703	2.33099	6.30777	0.558235	0.766772	2.07492
	1.88923	1.93323	5.78554	0.621456	0.63593	1.90314
	1.72626	3.60215	6.14686	0.567849	1.18492	2.02199
	4.31654	2.27331	9.90867	1.41991	0.7478	3.25943
	3.49378	3.28761	3.42621	1.14927	1.08145	1.12704
	5.07953	2.70416	4.86826	1.6709	0.889527	1.6014
	3.64072	2.45771	6.91543	1.19761	0.808456	2.27481
	3.42994	2.65108	9.89653	1.12827	0.872065	3.25544
	2.47039	1.59804	2.42333	0.812629	0.525671	0.797147
	3.5091	1.59078	4.12474	1.15431	0.523284	1.35682
	2.23588	2.62251	2.83234	0.735487	0.862667	0.931689
	2.31084	3.15895	6.17637	0.760144	1.03913	2.0317
	2.76192	1.72703	3.13424	0.908528	0.568102	1.031
	2.26943	2.37904	5.27151	0.746524	0.782579	1.73405
	2.47057	1.71492	5.562	0.812686	0.564118	1.82961
	2.89021	2.38008	3.32481	0.950729	0.782921	1.09369
	2.93377	3.23071	2.93833	0.965055	1.06273	0.966557
	2.63486	2.41132	5.36158	0.866729	0.793196	1.76368
	2.60373	1.77256	6.34875	0.856489	0.583078	2.0884
	2.55993	3.8719	8.50273	0.842084	1.27365	2.79695
	2.84581	3.37551	4.01869	0.936123	1.11037	1.32194
	1.961	2.83145	2.95665	0.645066	0.931397	0.972584
	2.7631	2.37801	1.98009	0.908915	0.78224	0.651346
	3.45988	3.42293	6.02071	1.13812	1.12596	1.9805
	3.47445	2.71132	4.40991	1.14291	0.891882	1.45063
	2.54772	3.57684	5.28635	0.838065	1.17659	1.73893
	3.33137	1.98537	2.23865	1.09585	0.653083	0.736398
average	3.04489	2.90227	5.66279	1.00161	0.954694	1.86276
