# Supplementary figures and images for: Kazrin promotes dynein/dynactin-dependent traffic from early to recycling endosomes
Source: eLife journal article supplement (doi:10.7554/elife.83793), 2023-04-25

Figure 1-figure supplement 4

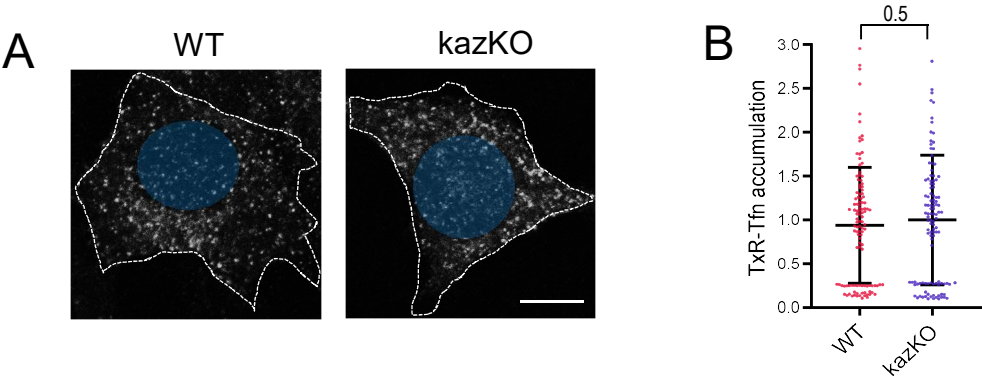

Supplement: supp [file elife-83793-supp-v1.zip]

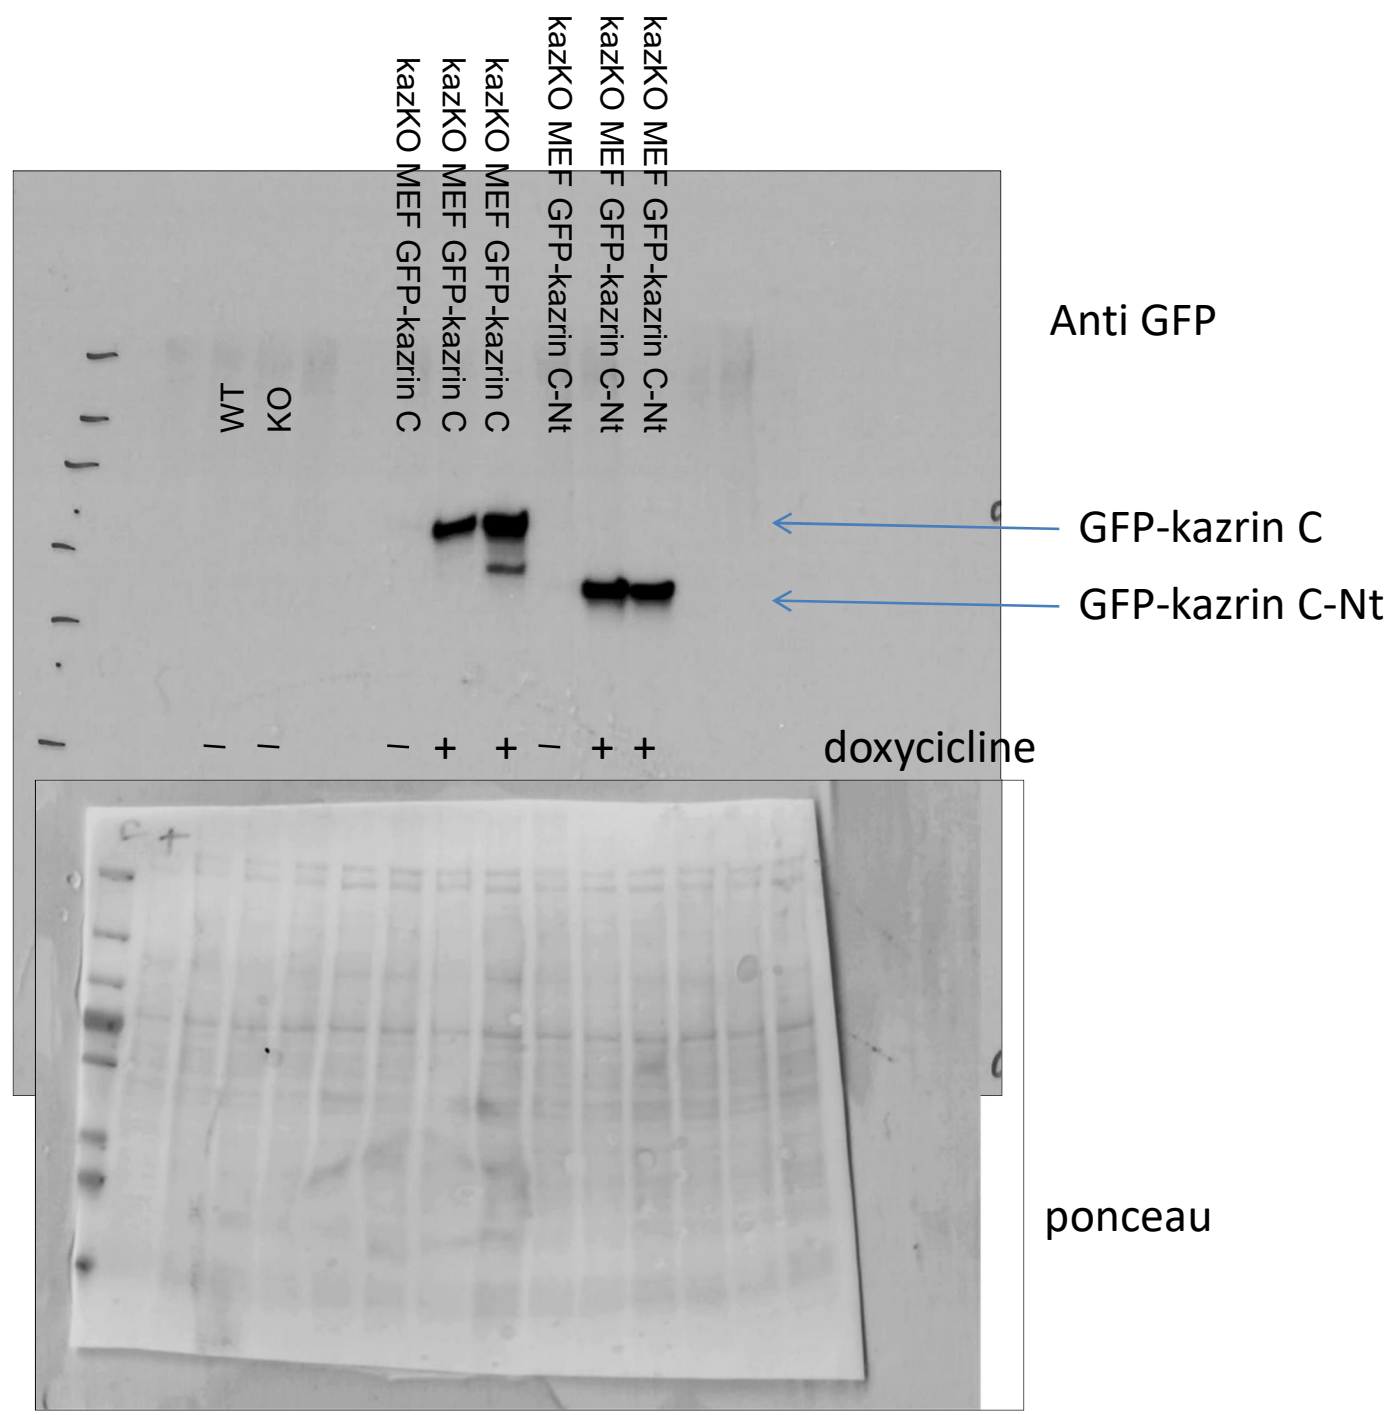

Supplement: supp [file elife-83793-supp-v1.zip]

Figure 5-supplemental figure 2

A

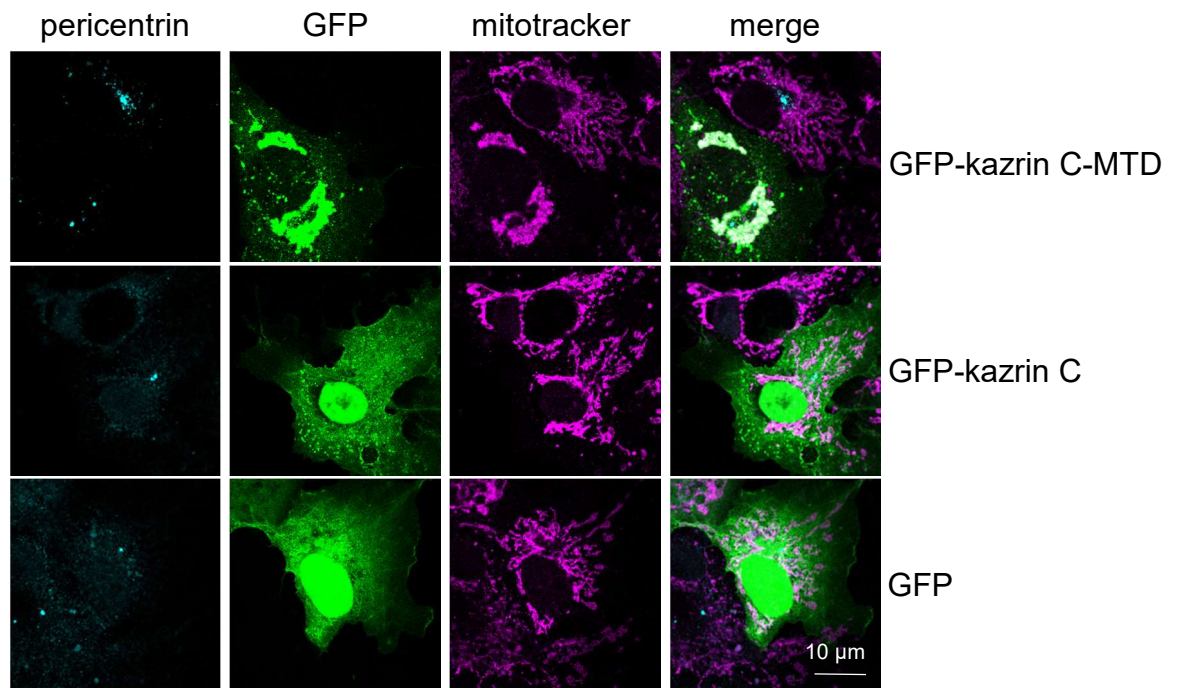

B

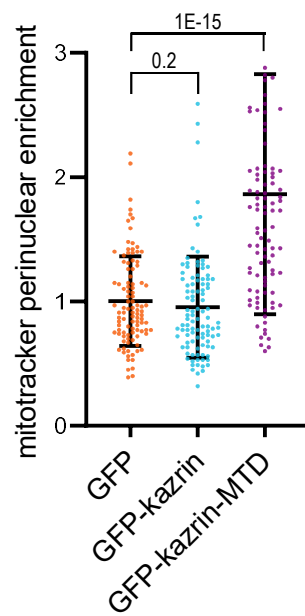

Supplement: supp [file elife-83793-supp-v1.zip]

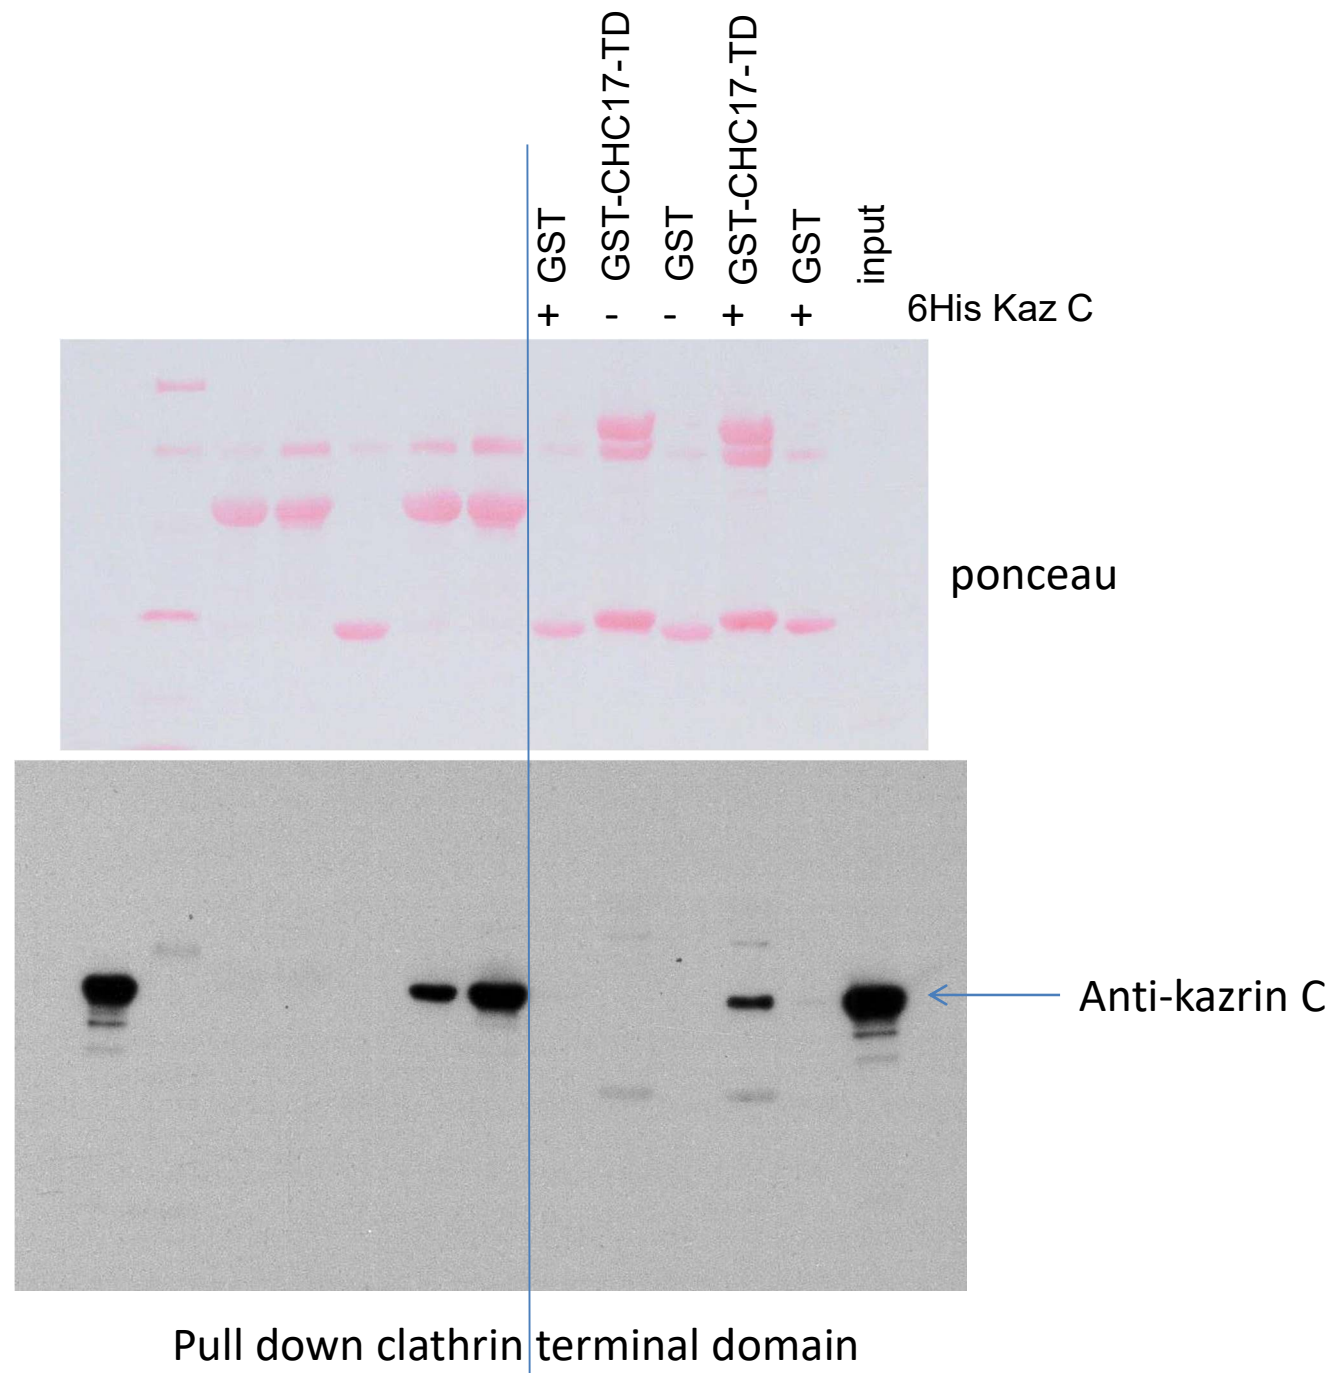

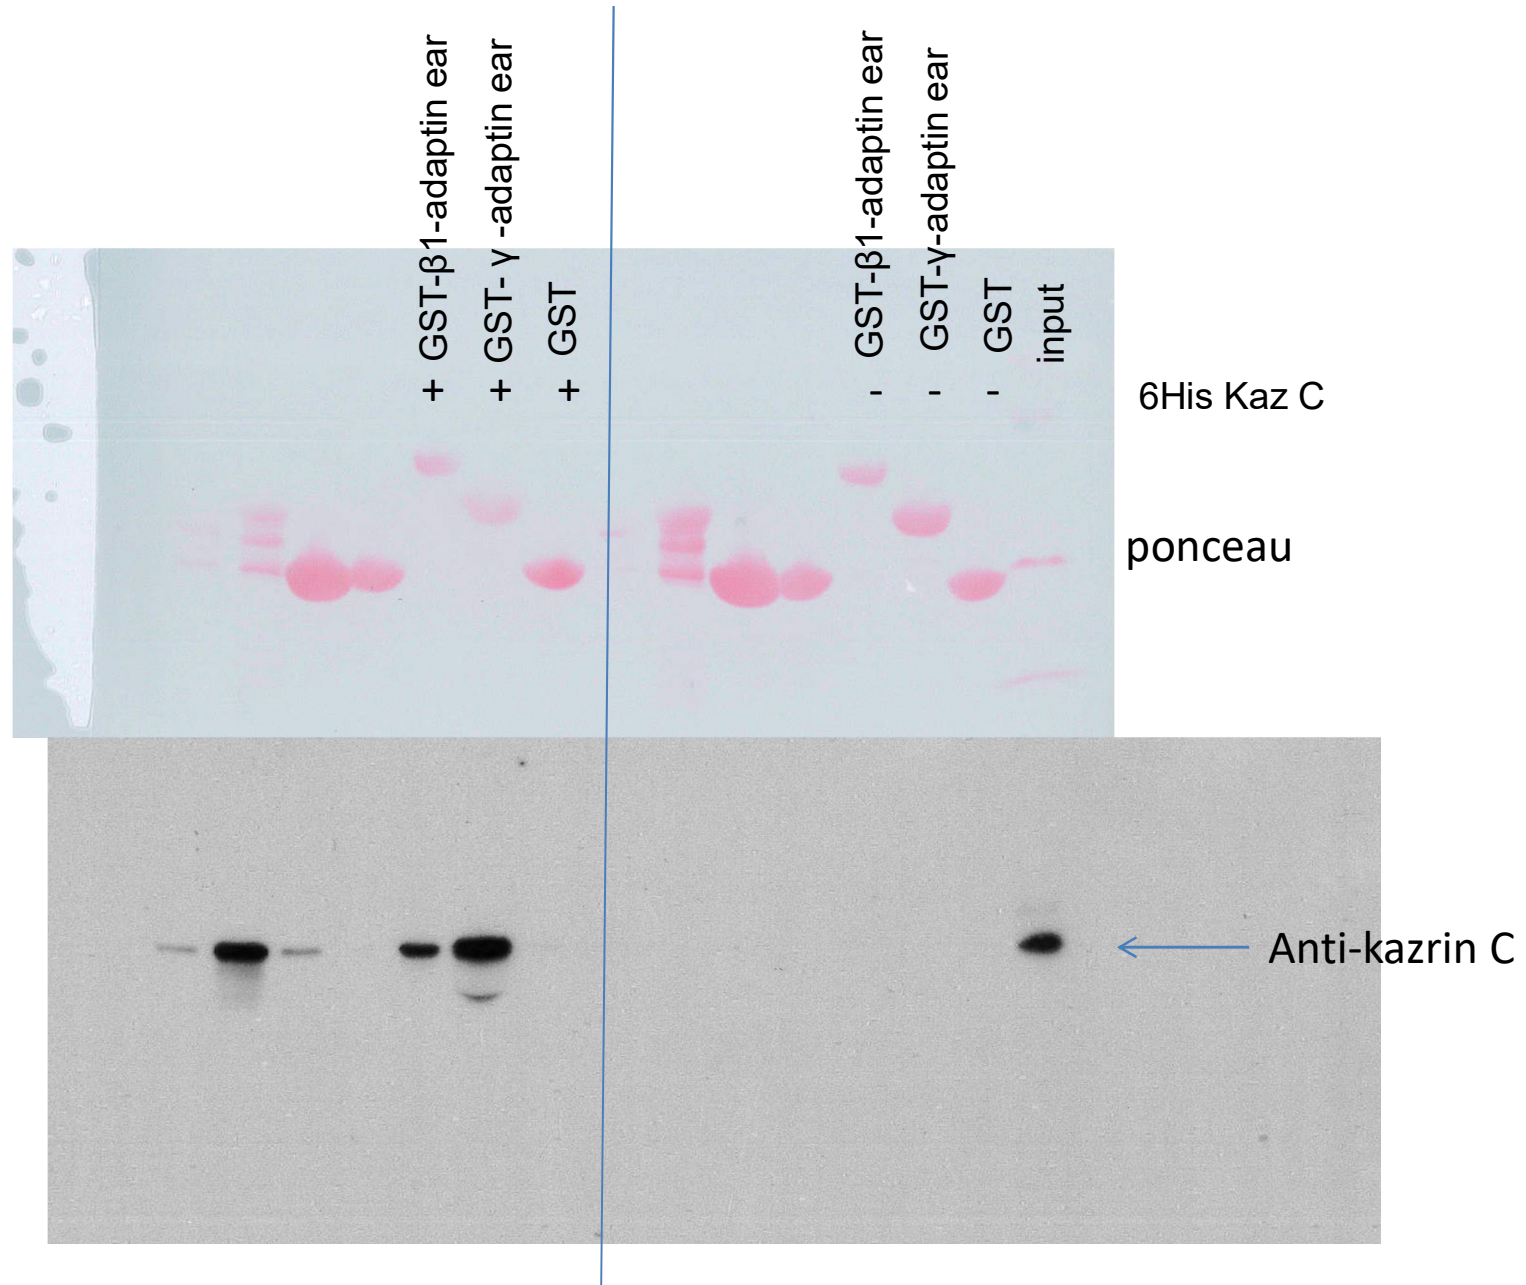

Pull down ear of gamma adaptin

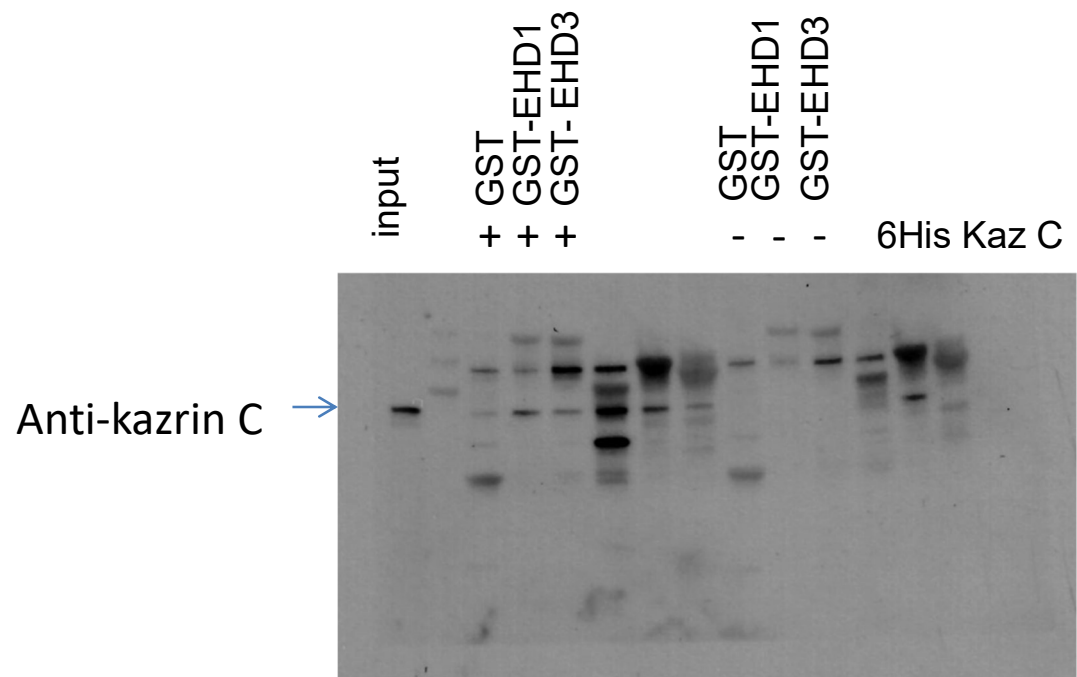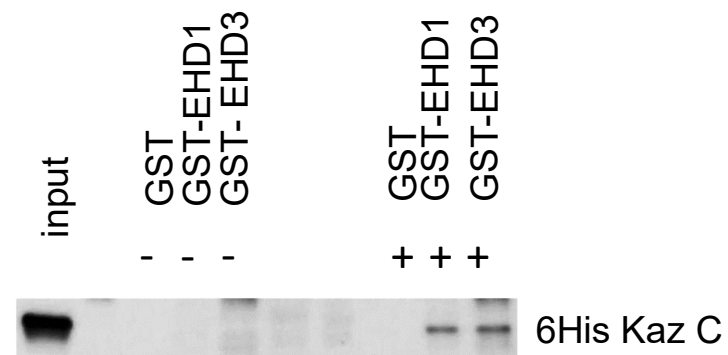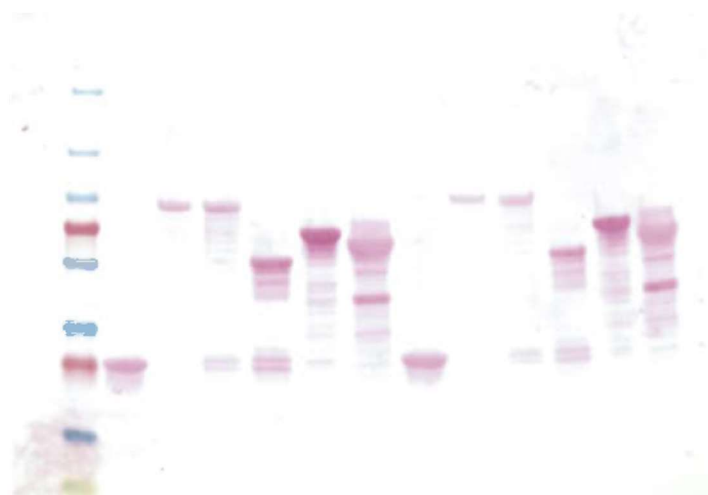

Primer exp

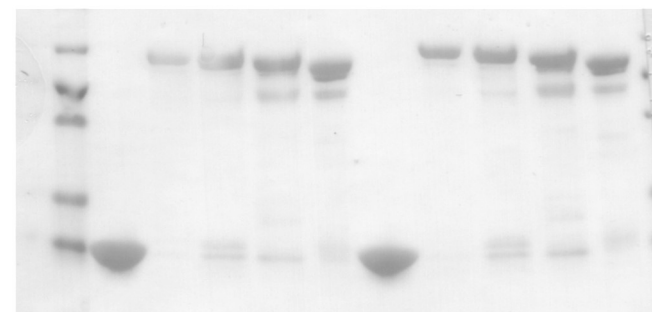

Segundo exp

Supplement: supp [file elife-83793-supp-v1.zip]

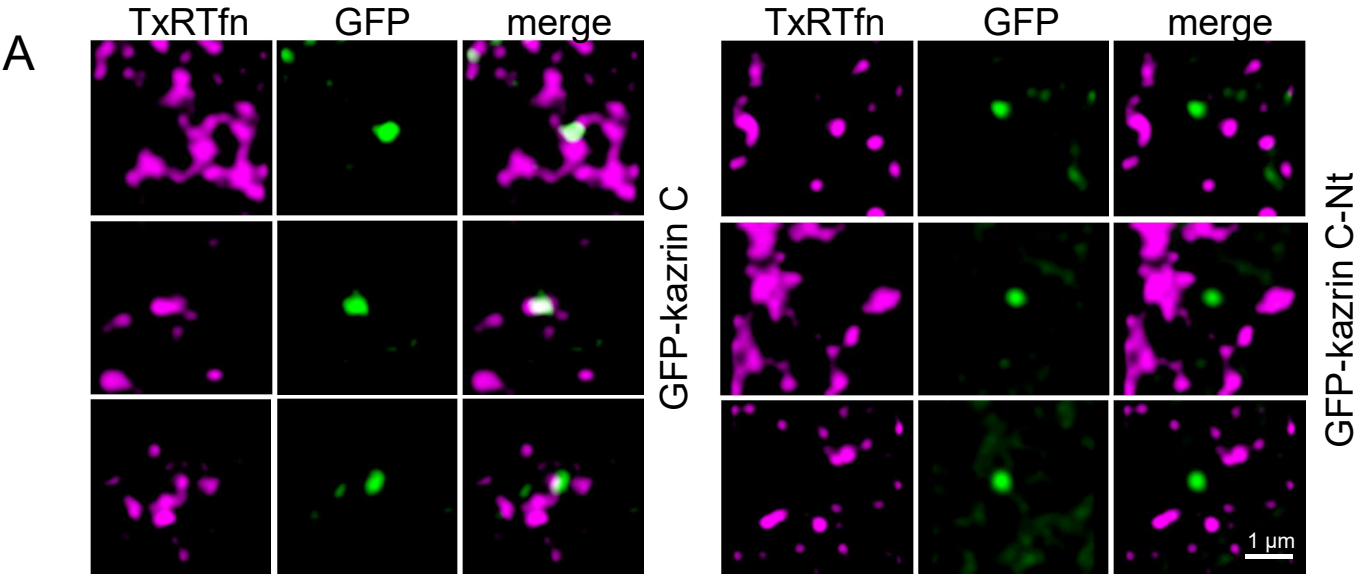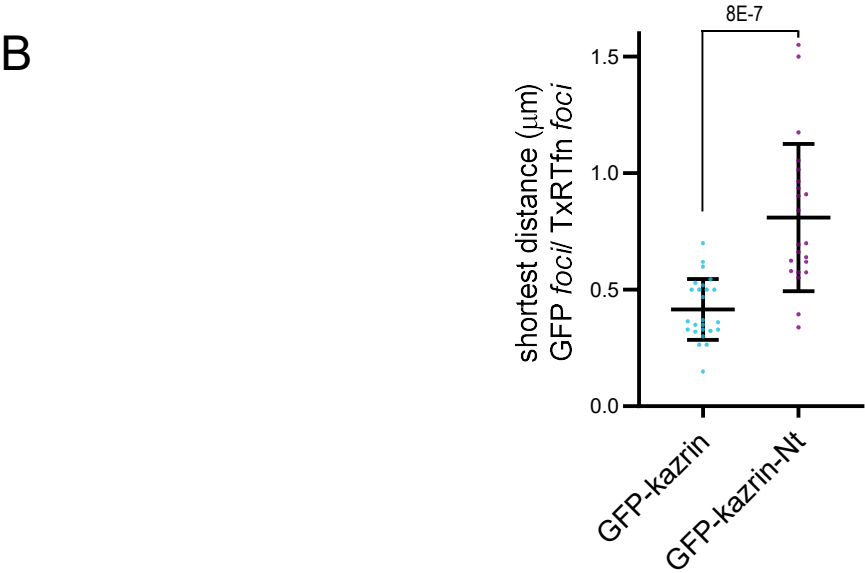

Supplement: supp [file elife-83793-supp-v1.zip]

Figure 2—figure supplement 1

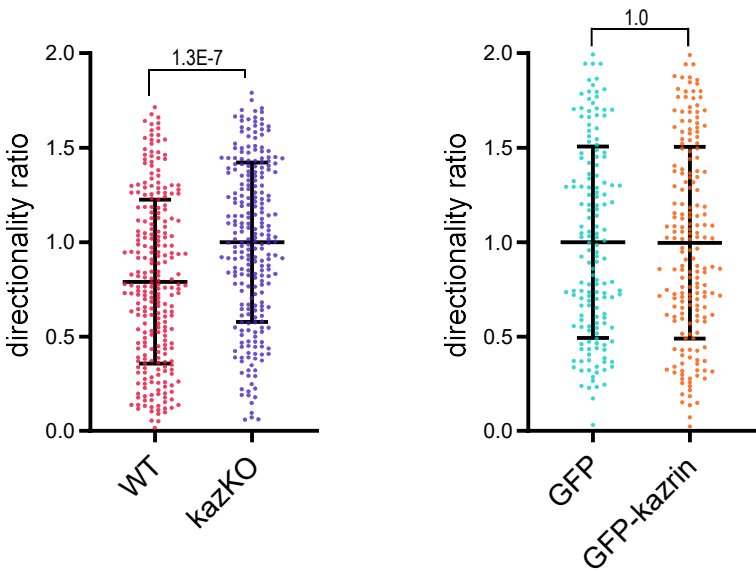

Supplement: supp [file elife-83793-supp-v1.zip]

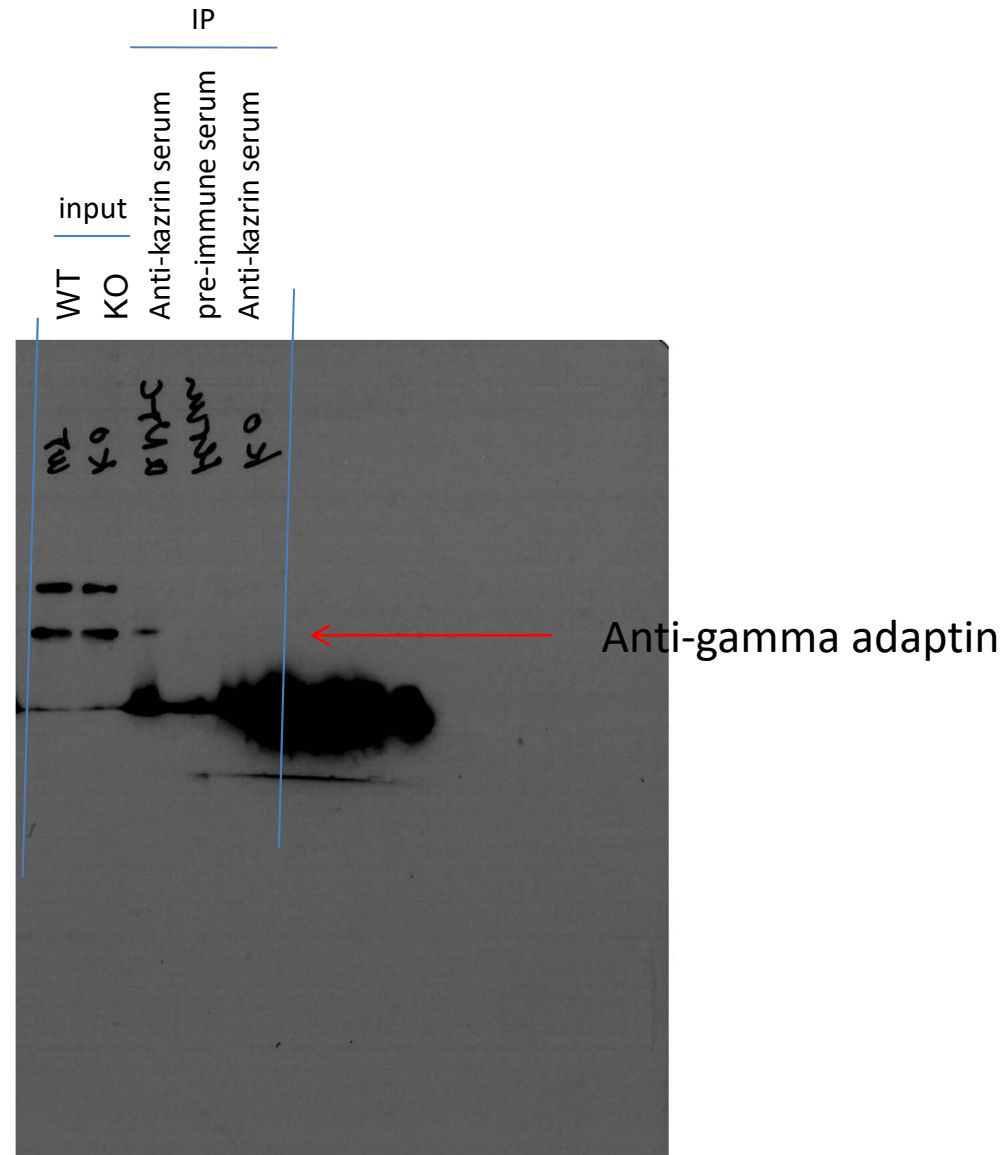

Supplement: supp [file elife-83793-supp-v1.zip]

Figure 1-figure supplement 2

A

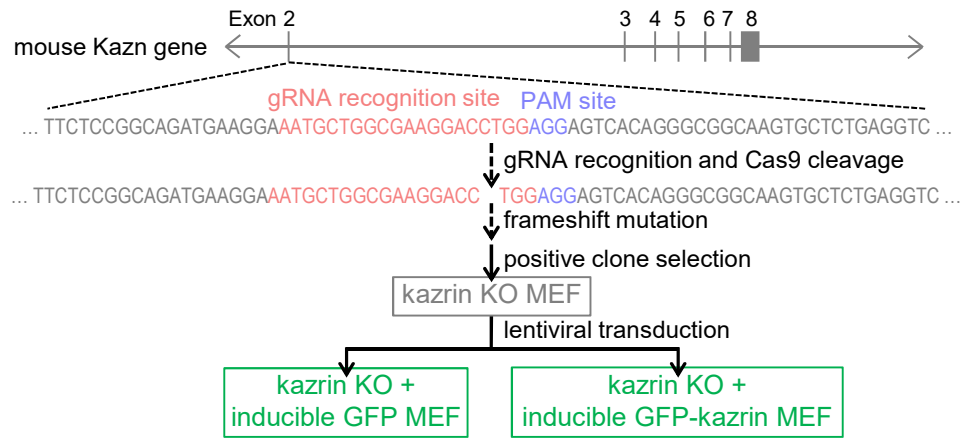

B

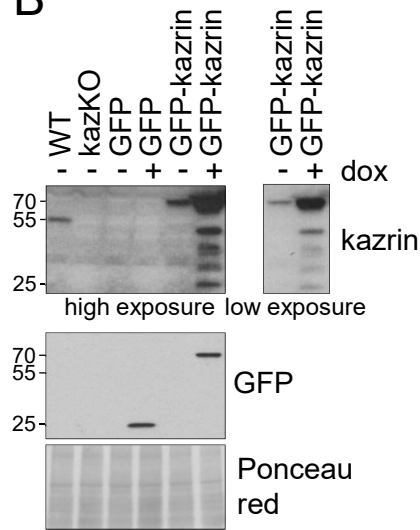

C

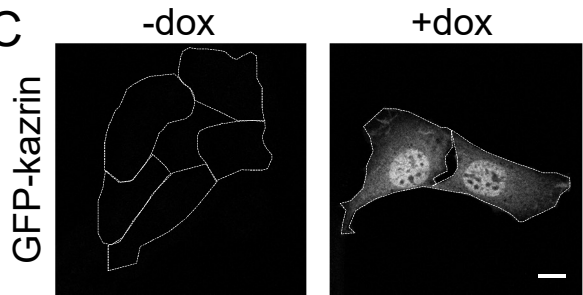

Supplement: supp [file elife-83793-supp-v1.zip]

Figure 1-figure supplement 5

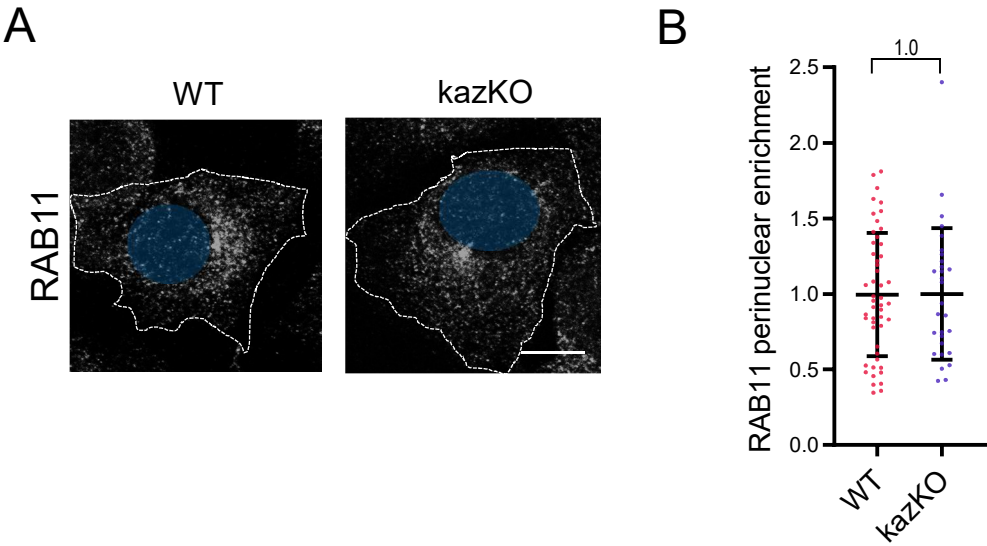

Supplement: supp [file elife-83793-supp-v1.zip]

Figure 3-figure supplement 2

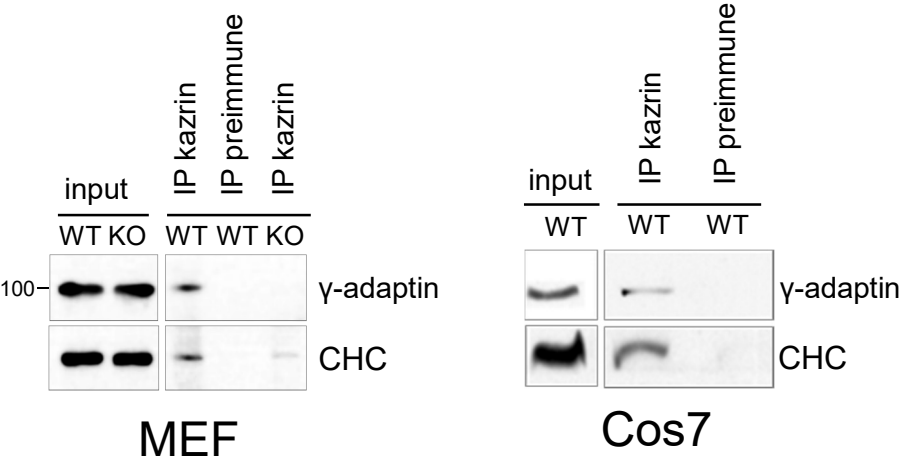

Supplement: supp [file elife-83793-supp-v1.zip]

Figure 6-figure supplement 2

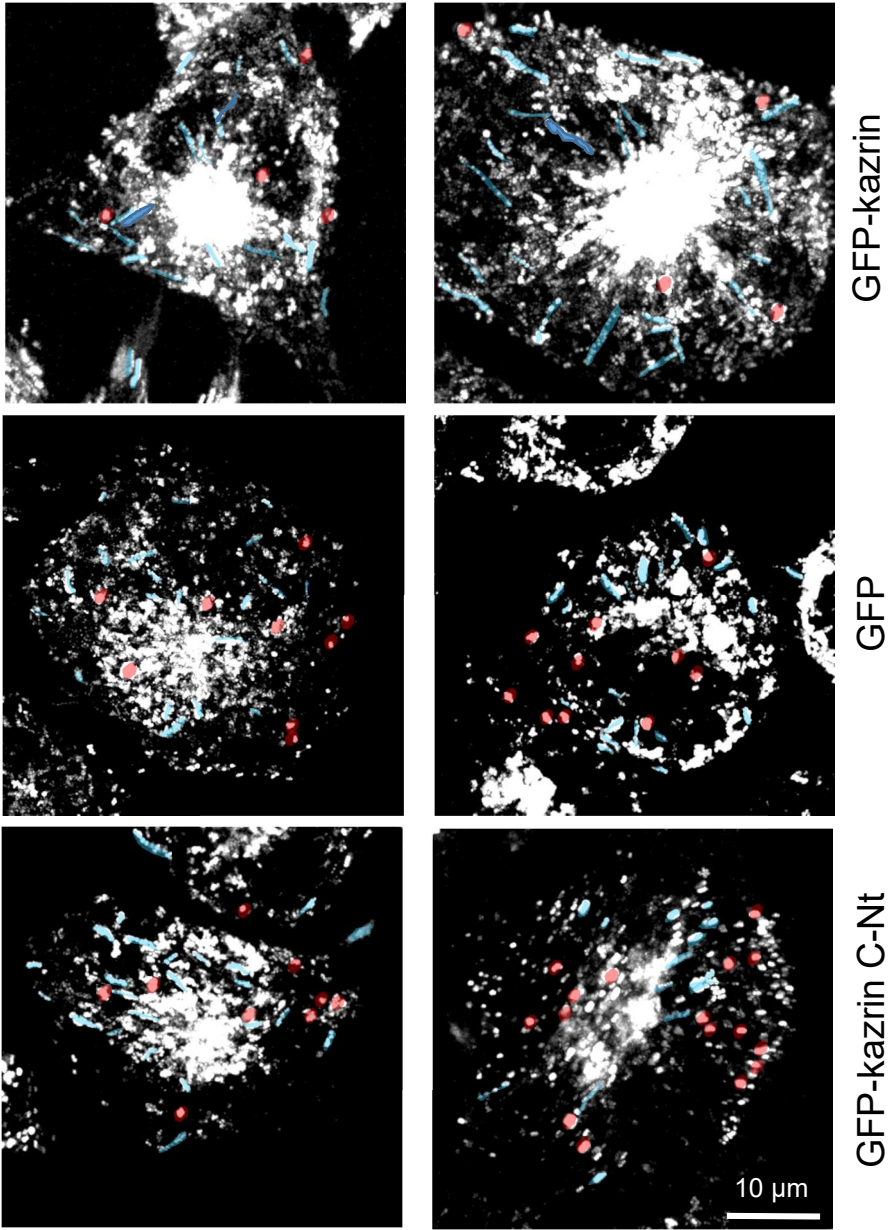

Supplement: supp [file elife-83793-supp-v1.zip]

Figure 6-figure supplement 1

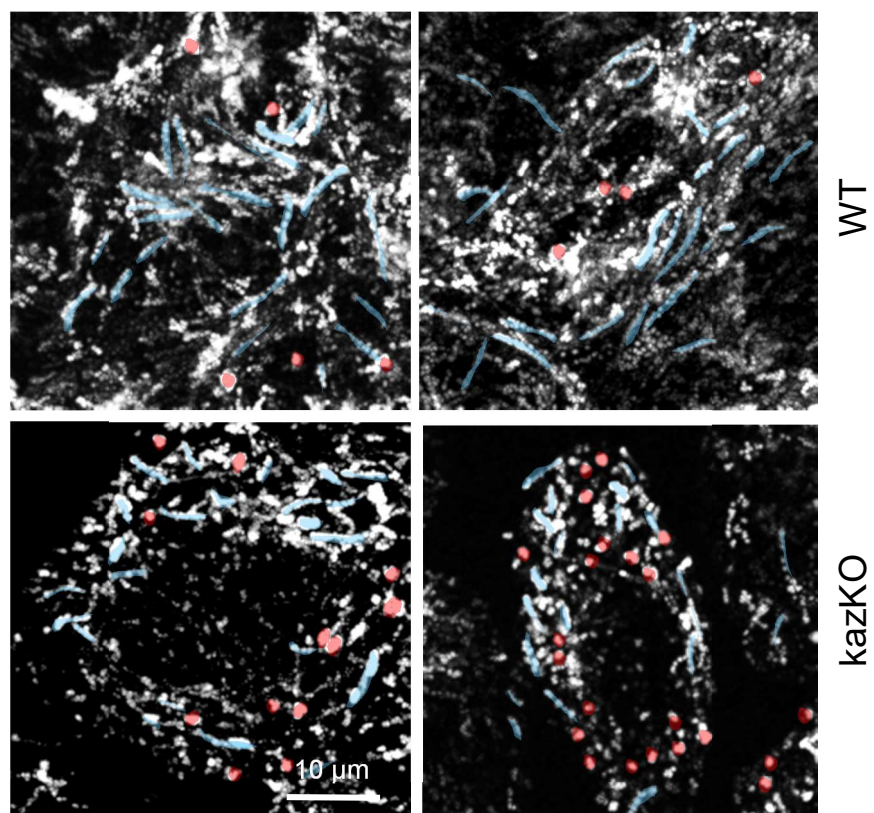

Supplement: supp [file elife-83793-supp-v1.zip]

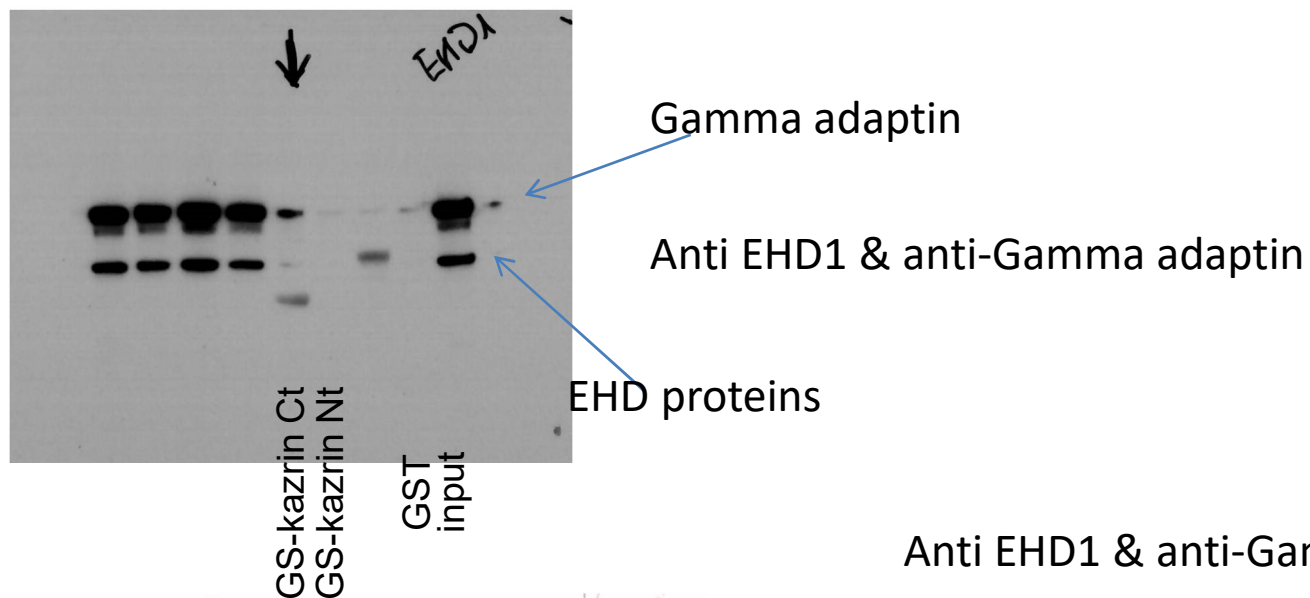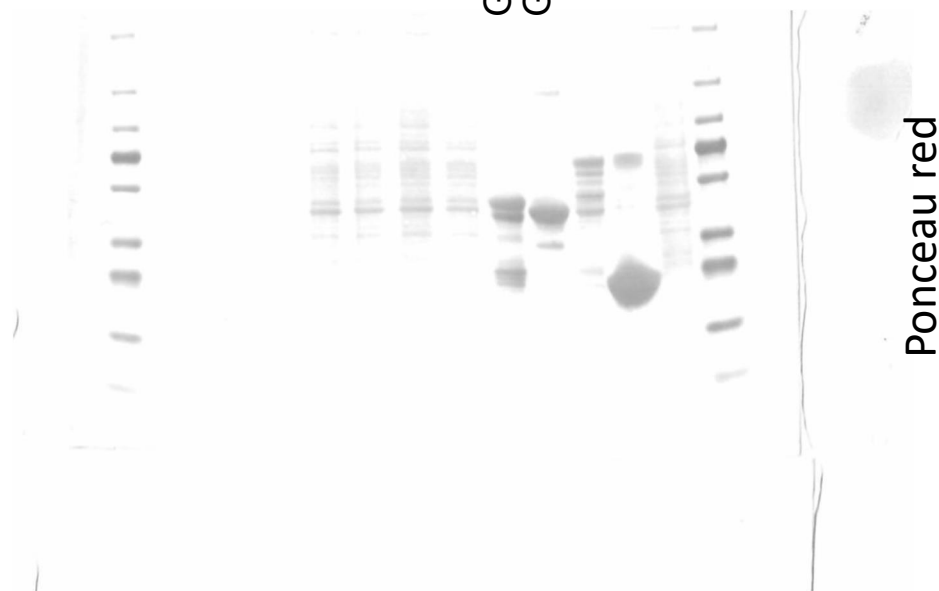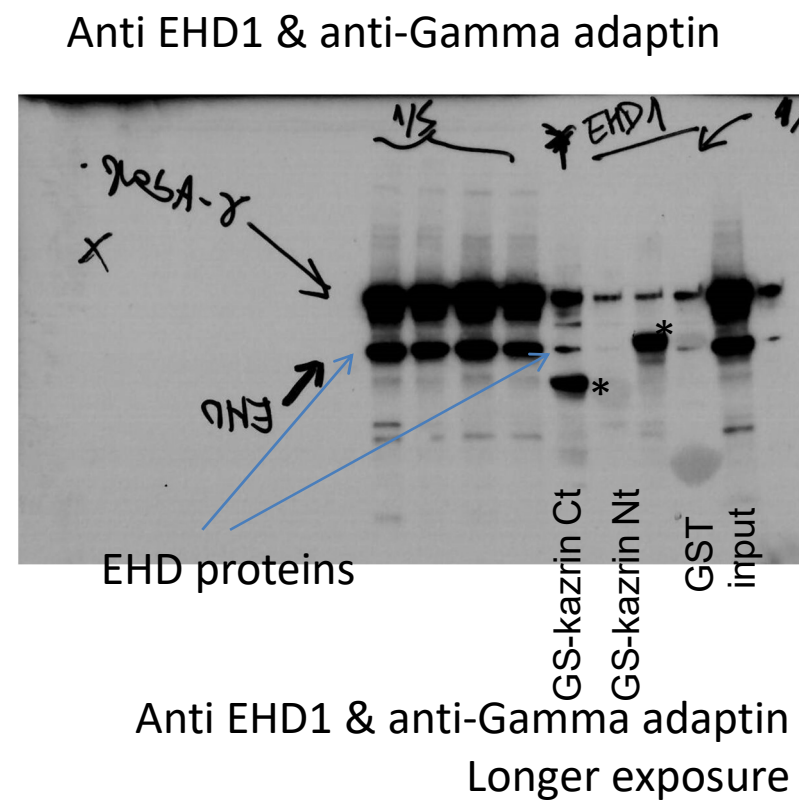

\* GST constructs recognized by the secondary antibody

Supplement: supp [file elife-83793-supp-v1.zip]

Figure 5-supplemental figure 1

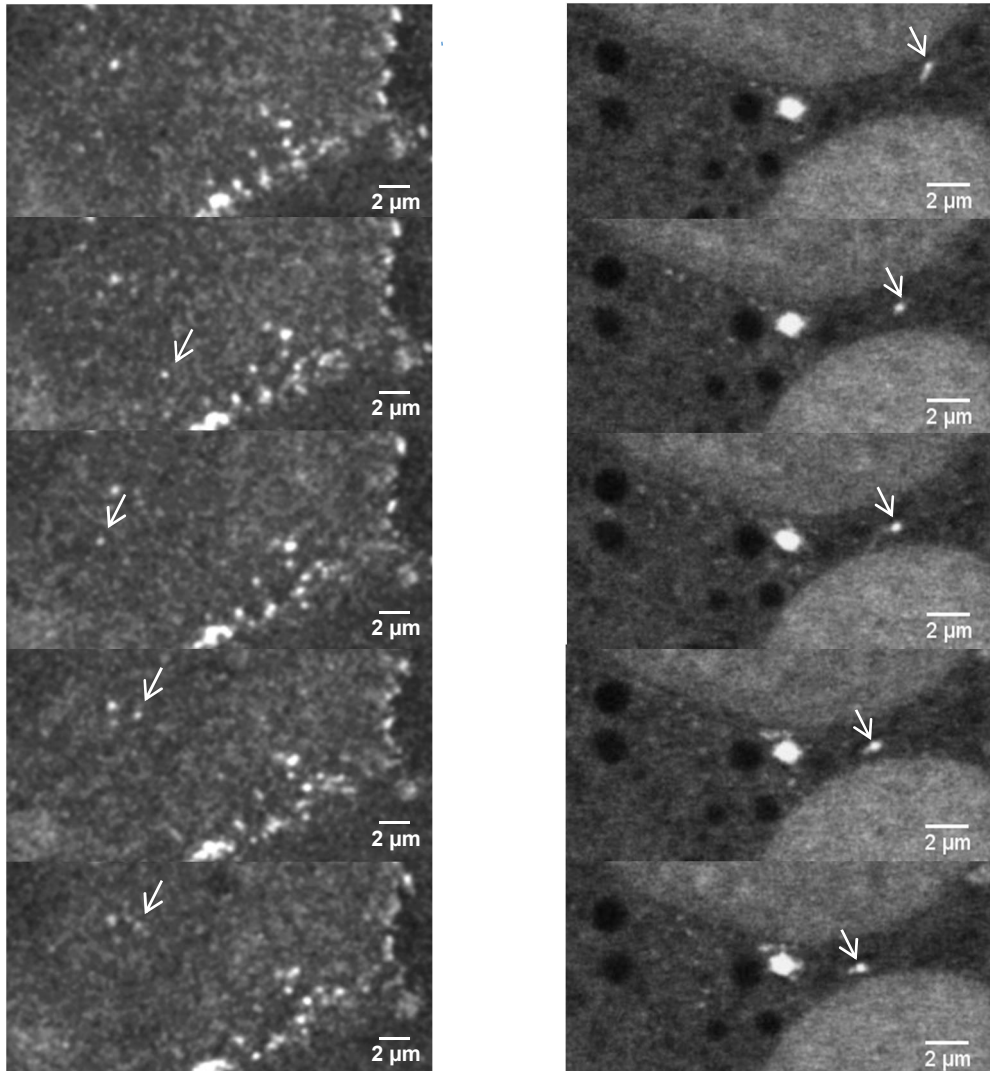

Supplement: supp [file elife-83793-supp-v1.zip]

Figure 4-figure supplement 2

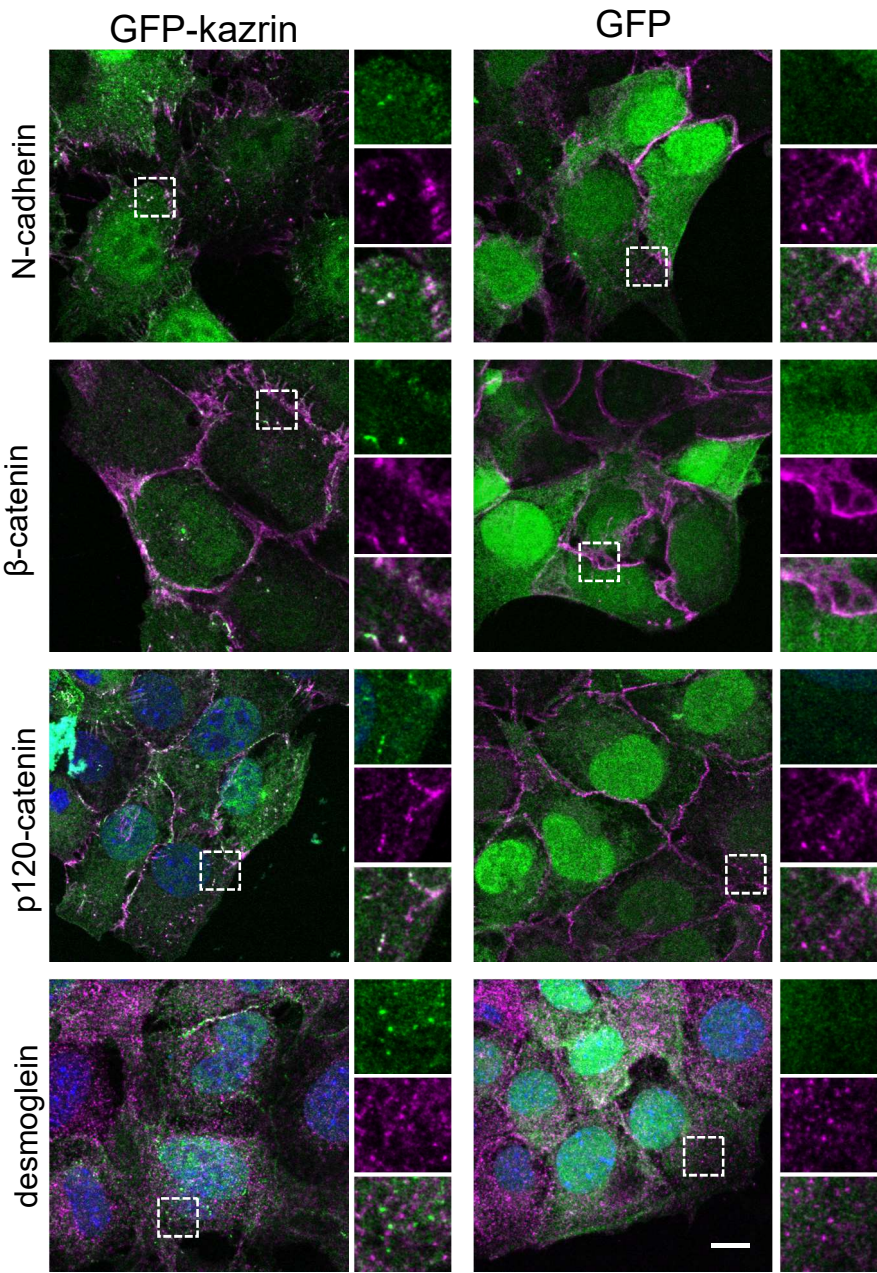

Supplement: supp [file elife-83793-supp-v1.zip]

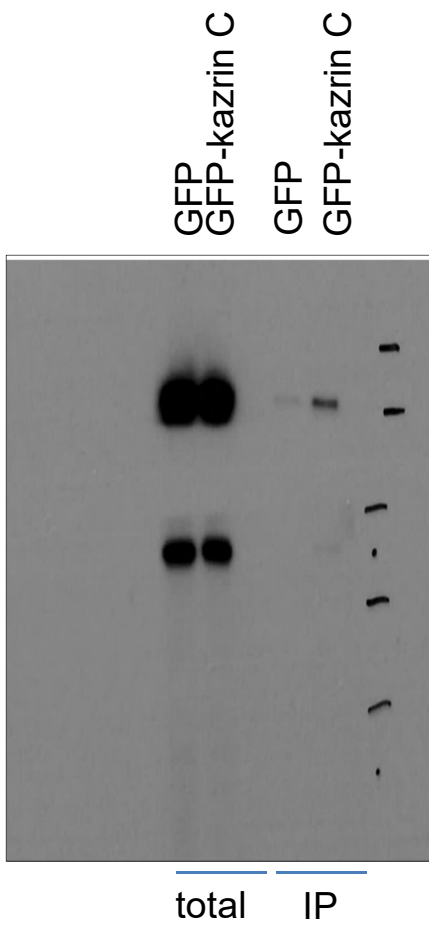

Anti-gamma adaptin

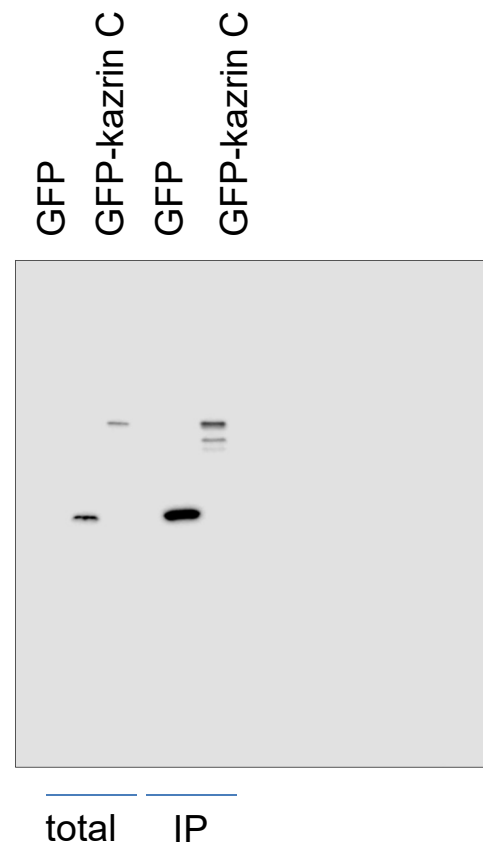

Anti-GFP

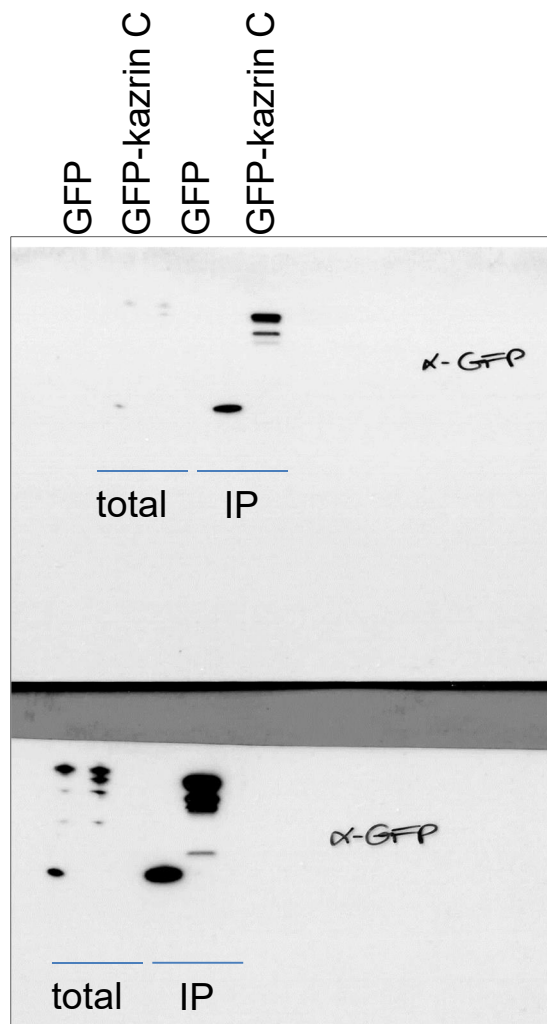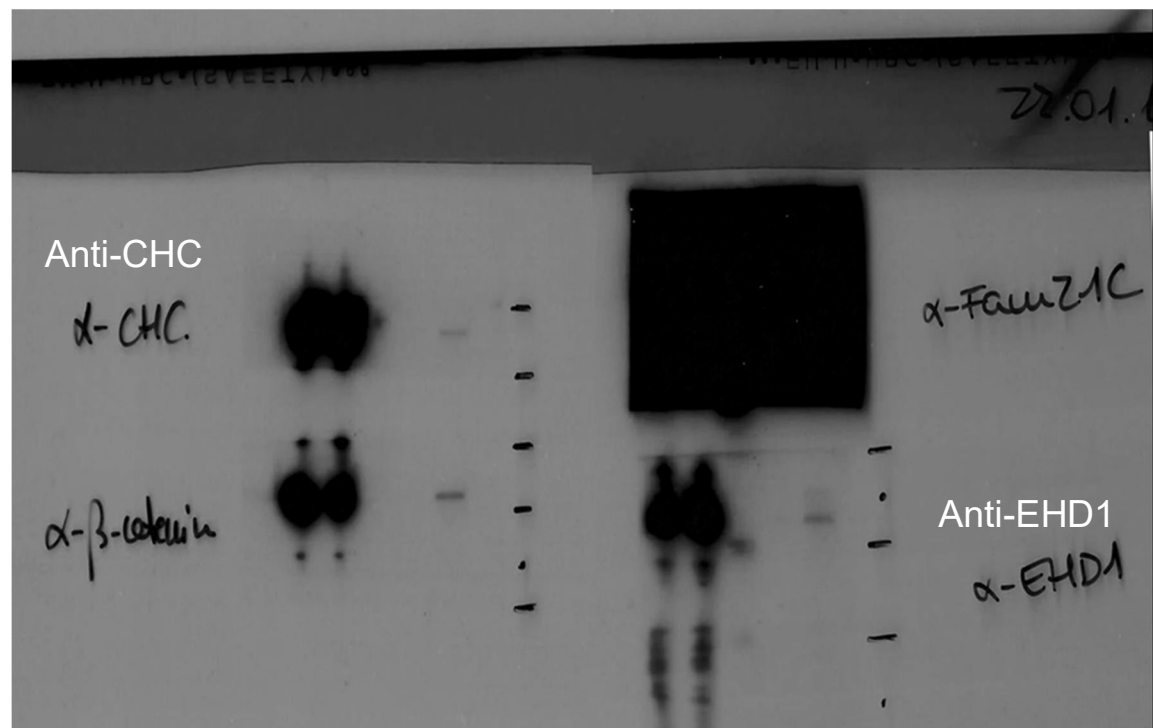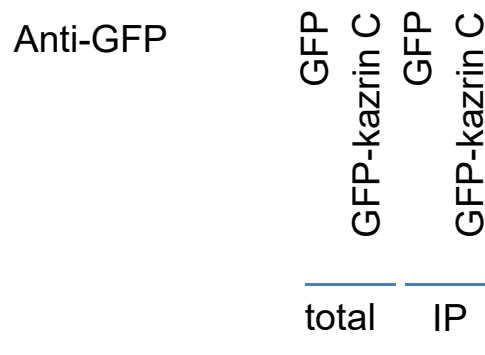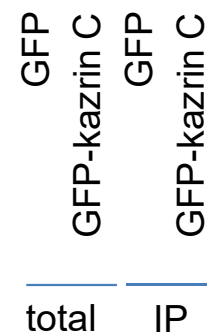

Anti-GFP

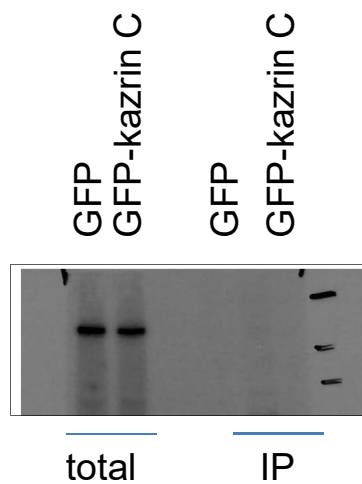

Anti-EEA1

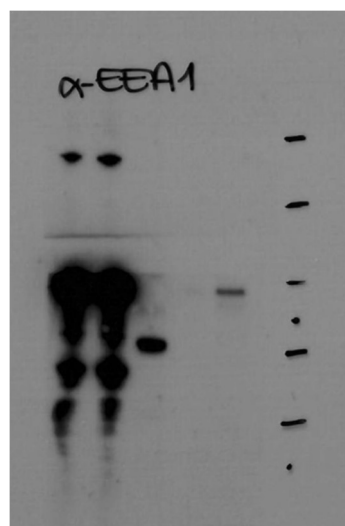

Anti-EEA1

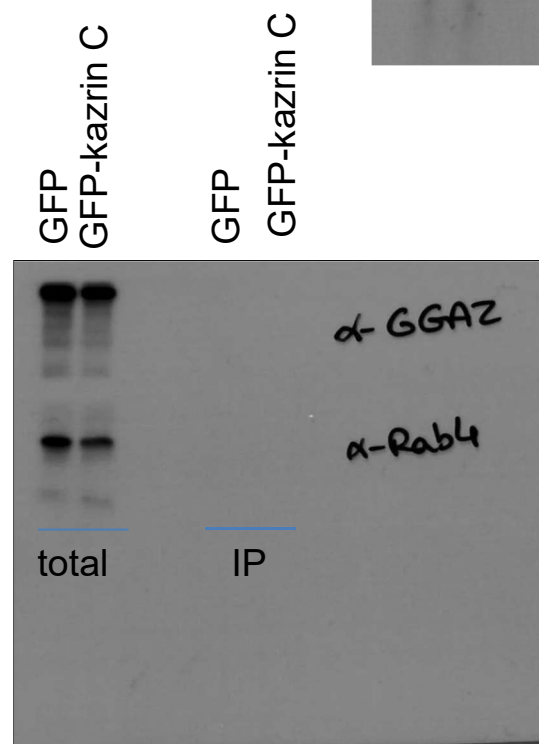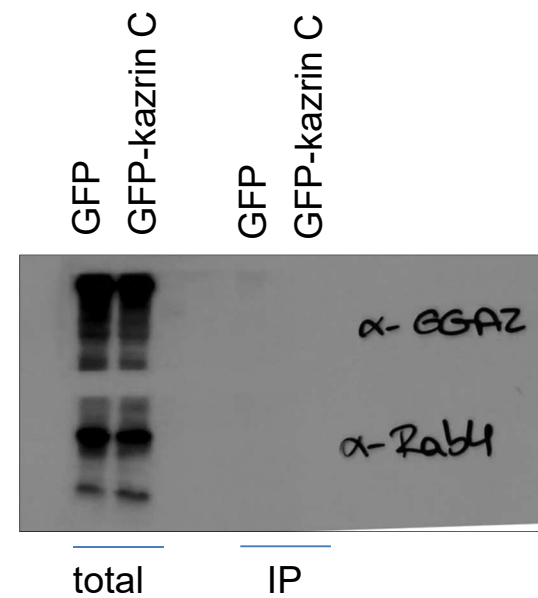

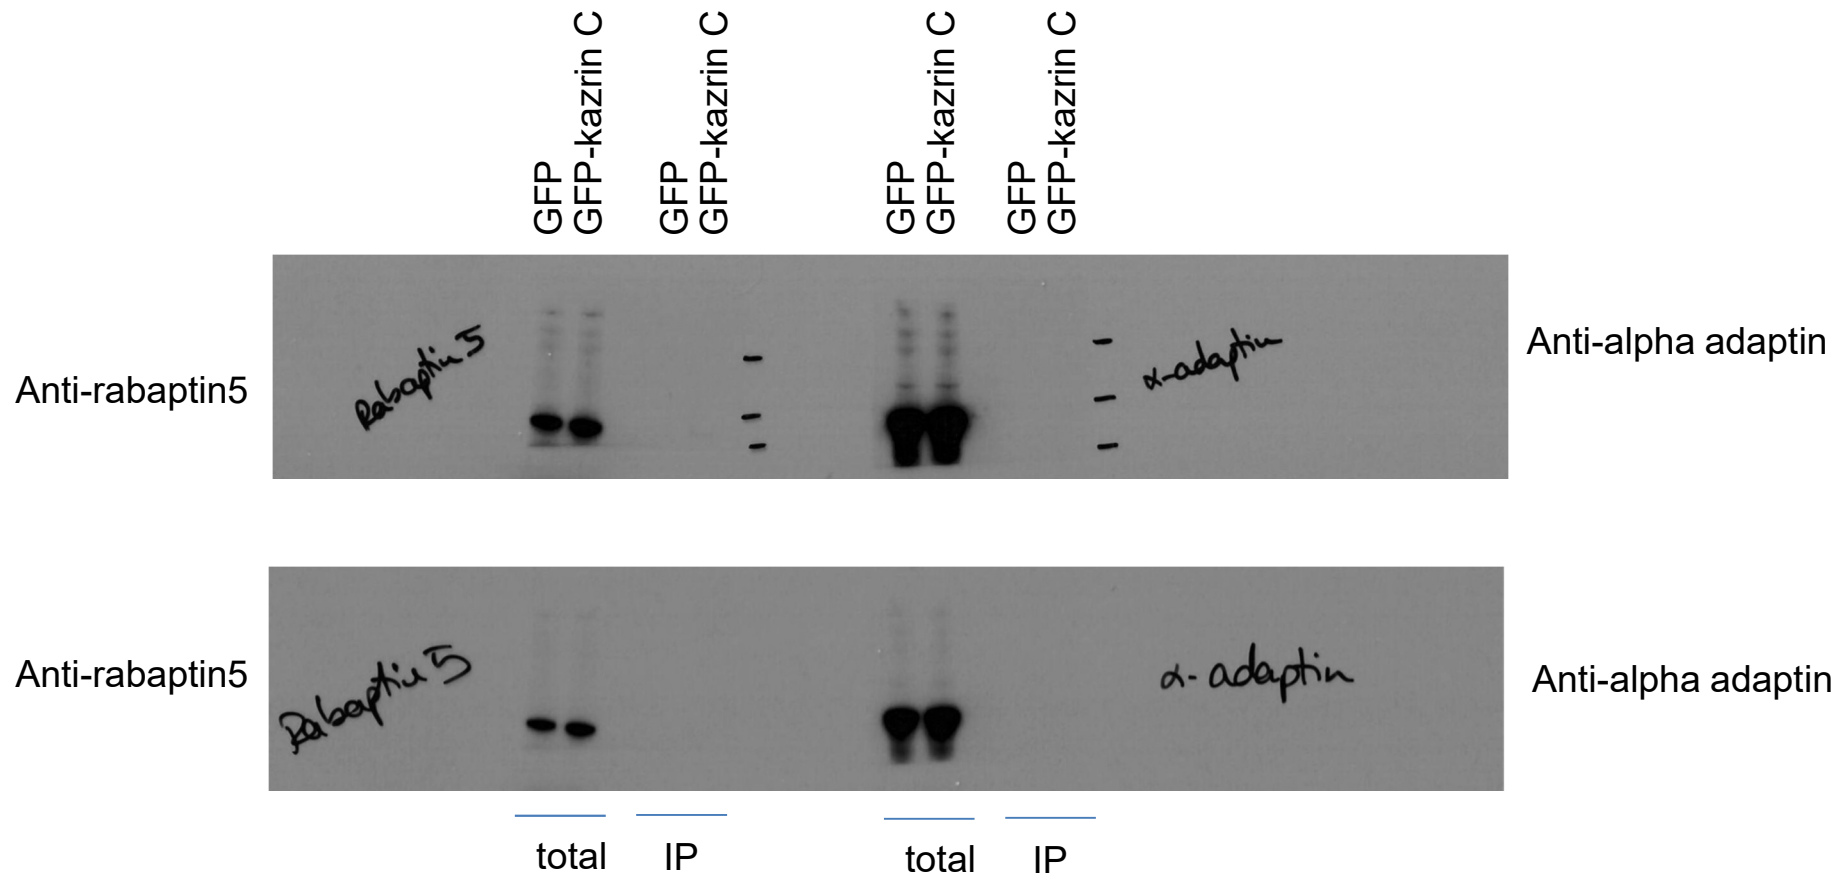

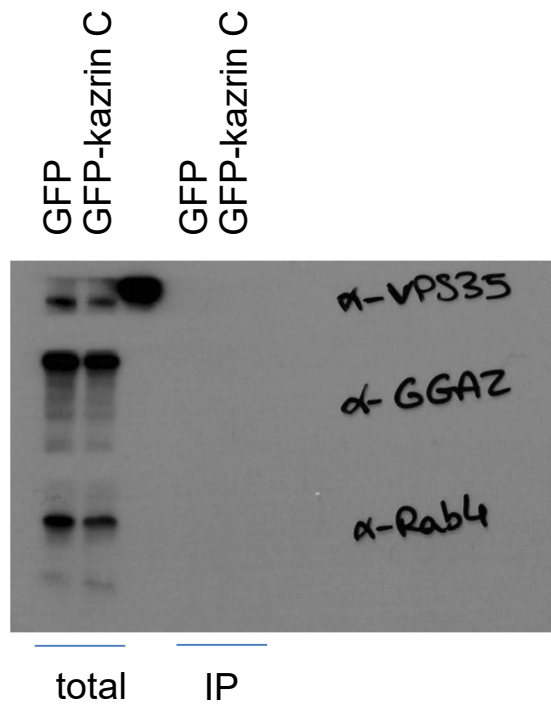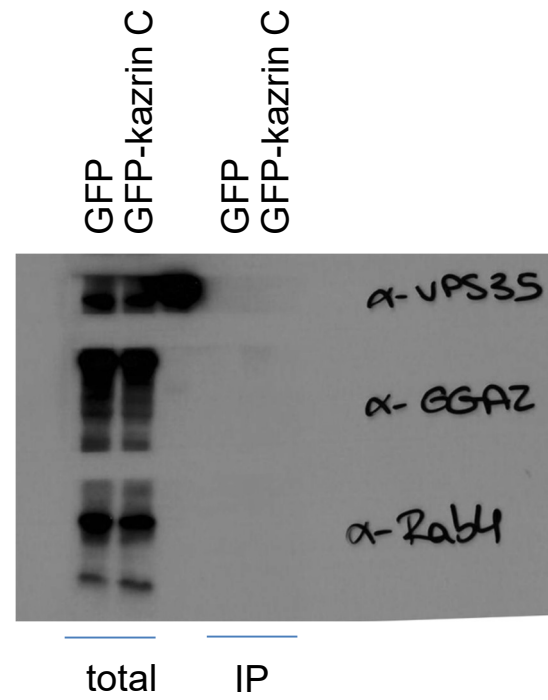

Supplement: supp [file elife-83793-supp-v1.zip]

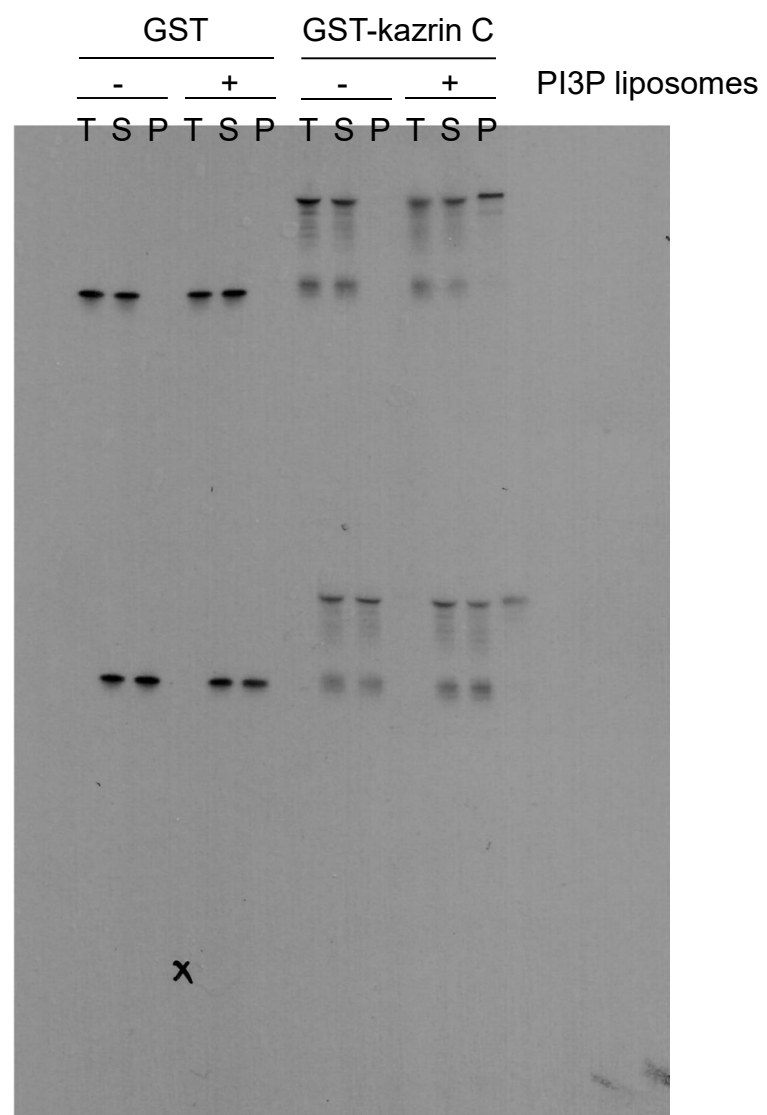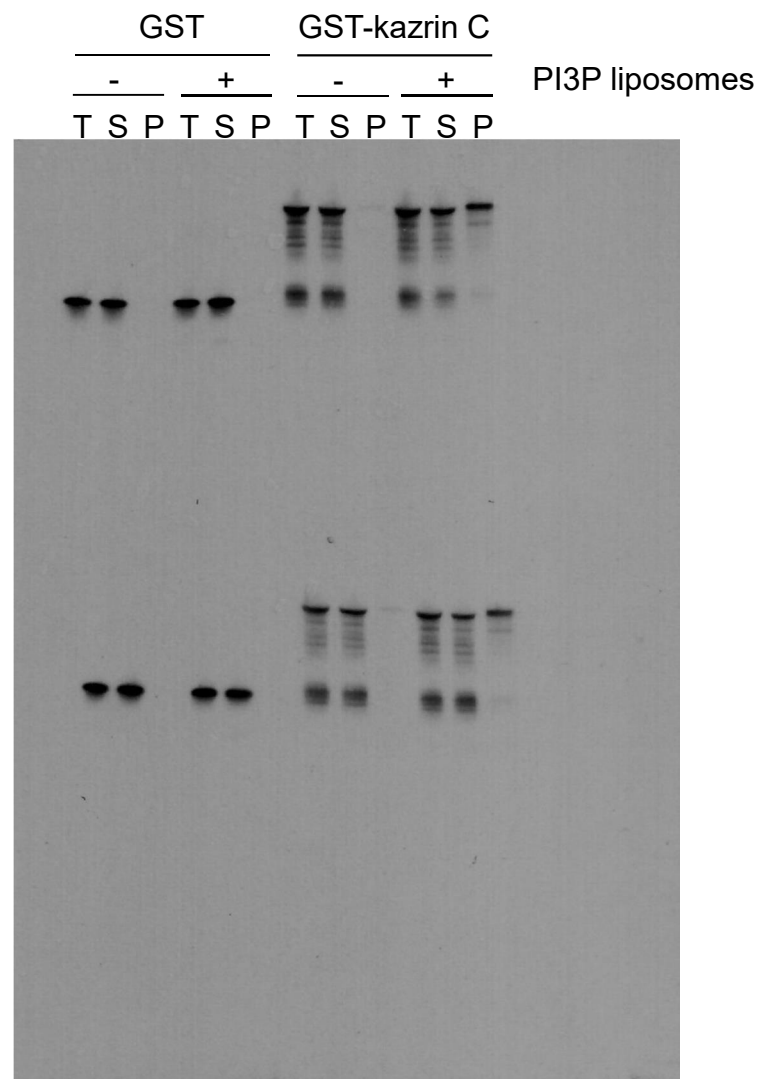

Supplement: supp [file elife-83793-supp-v1.zip]

## Cos 7 cells immunoblot

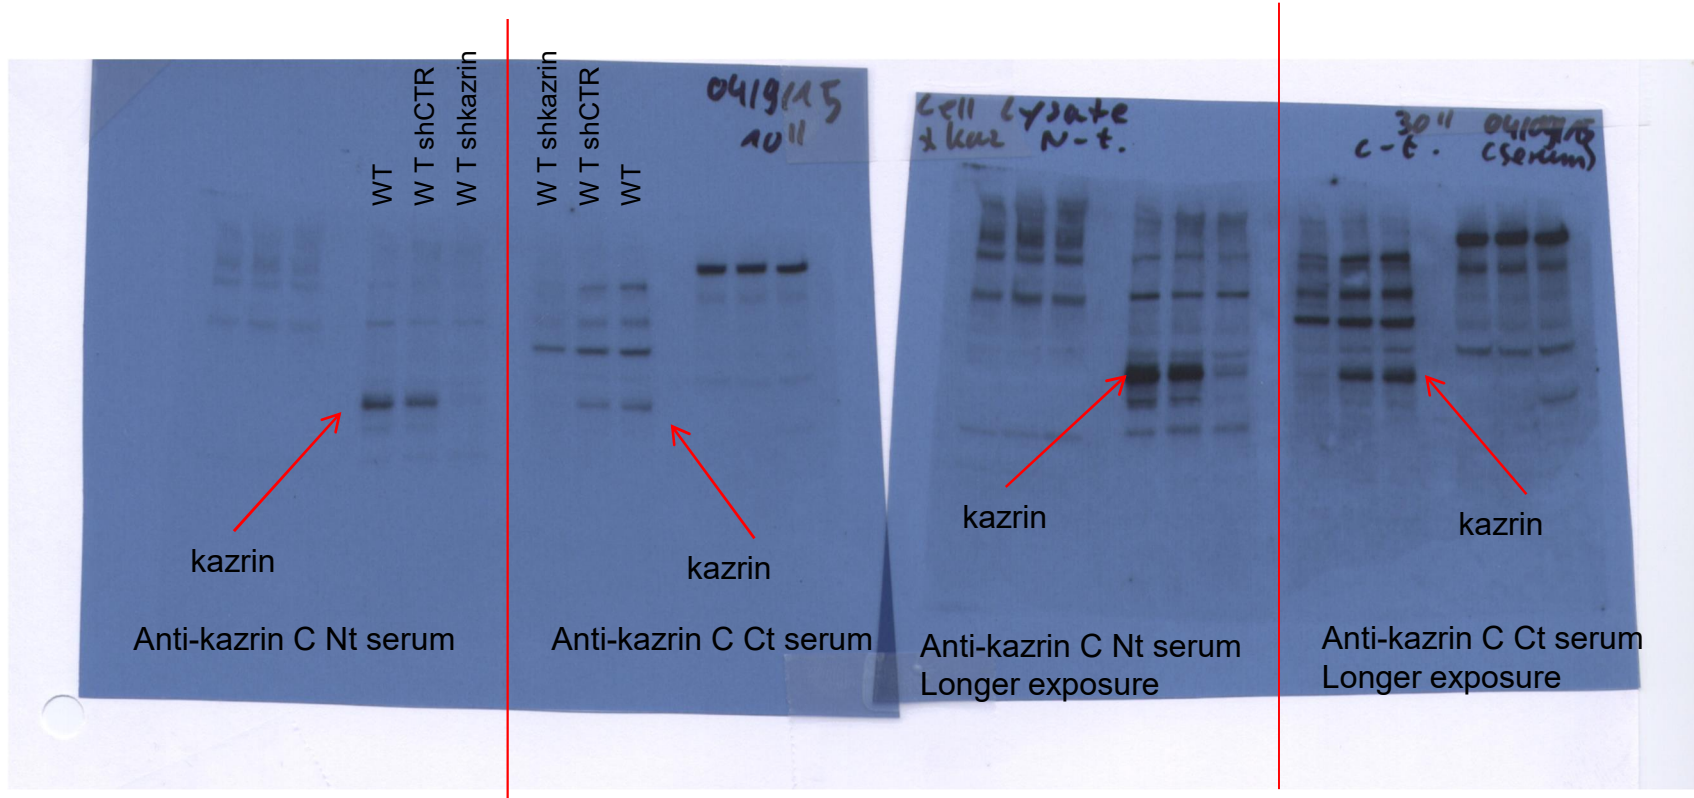

Supplement: supp [file elife-83793-supp-v1.zip]

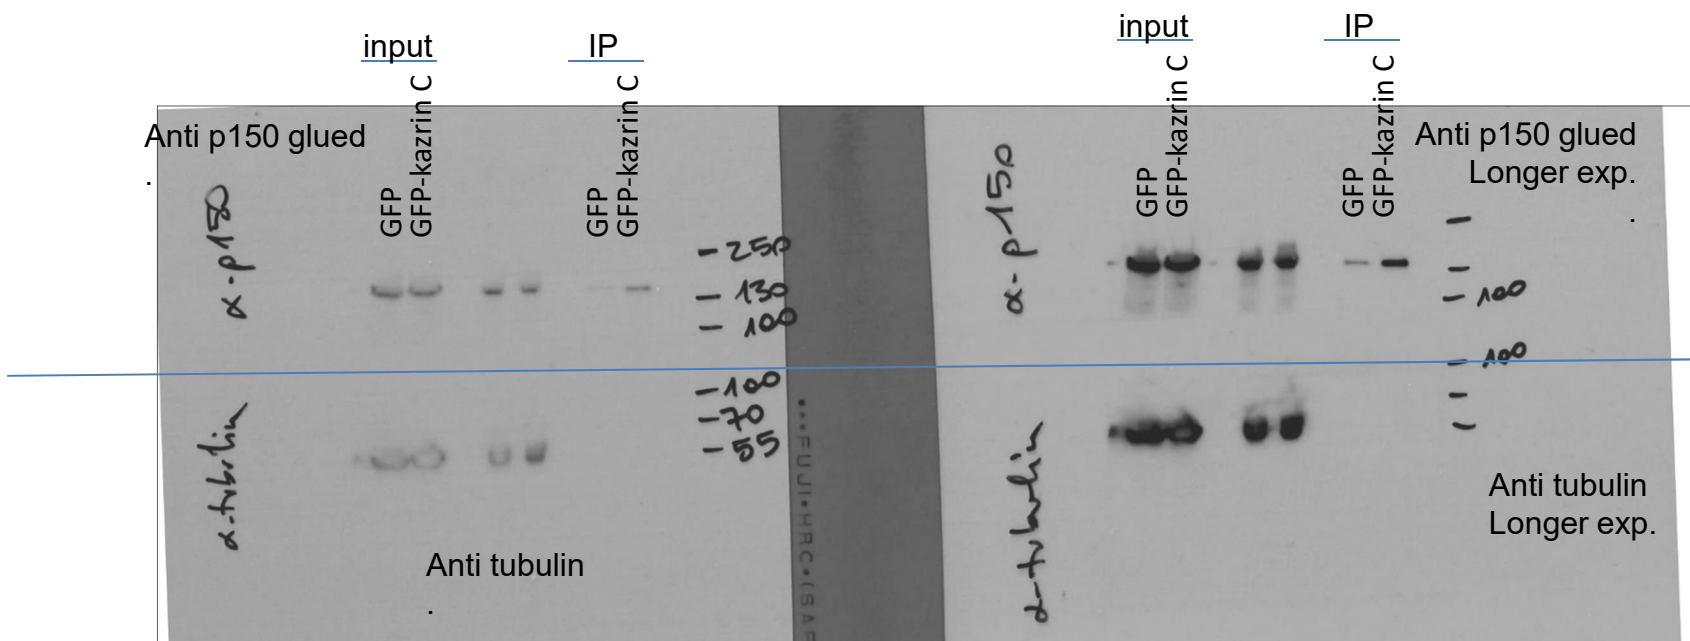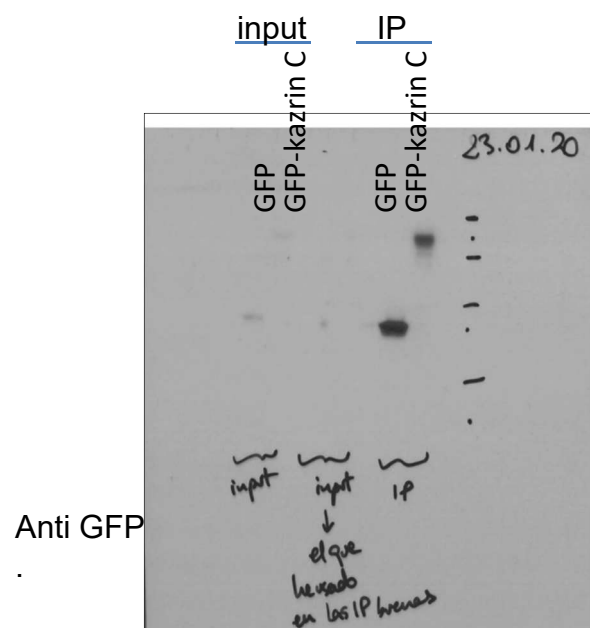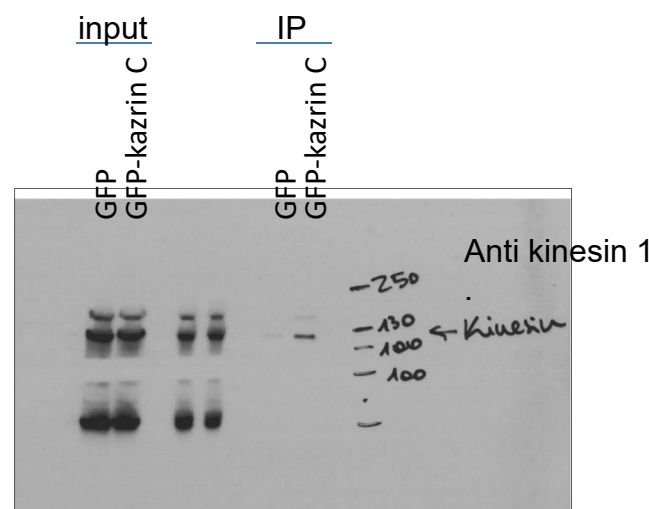

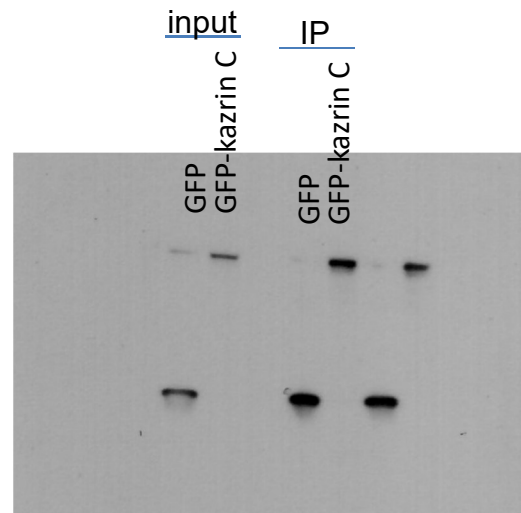

Anti GFP

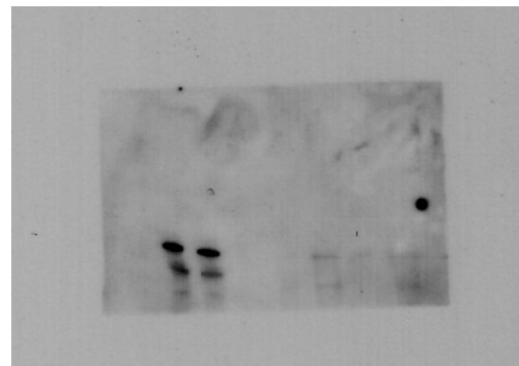

Anti Dynein HC

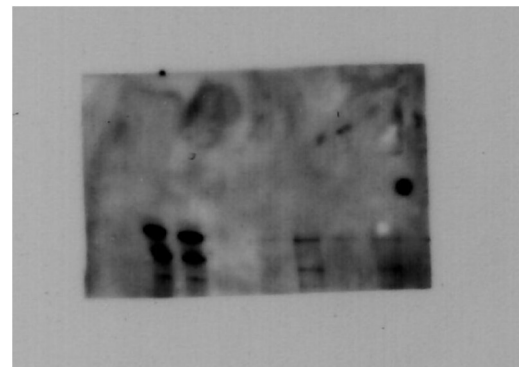

Anti Dynein HC longer exposure

Supplement: supp [file elife-83793-supp-v1.zip]

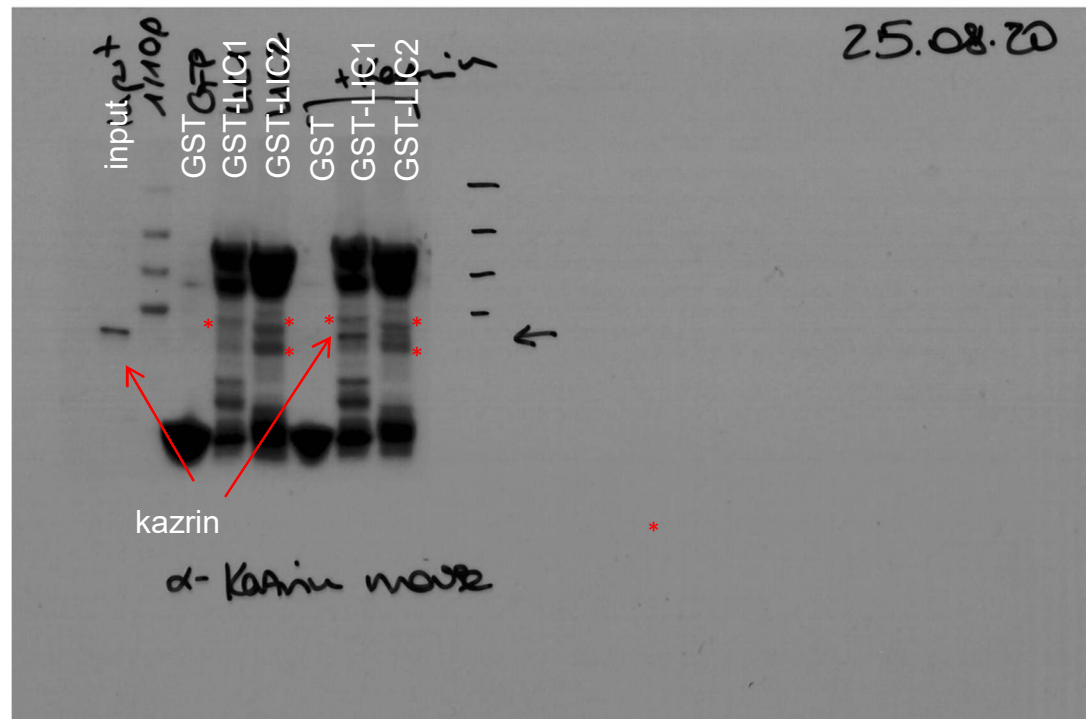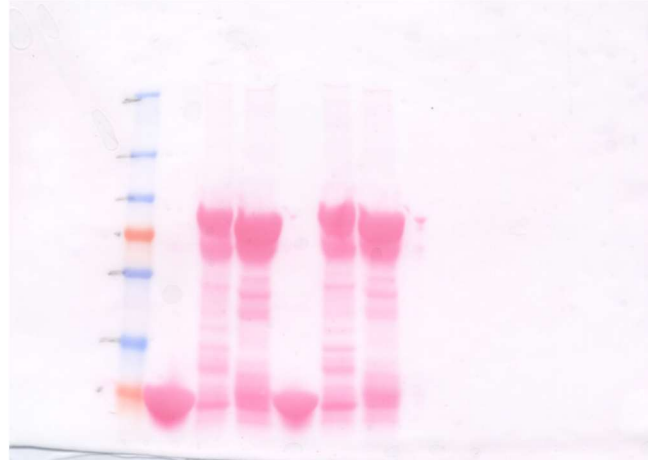

Supplement: supp [file elife-83793-supp-v1.zip]

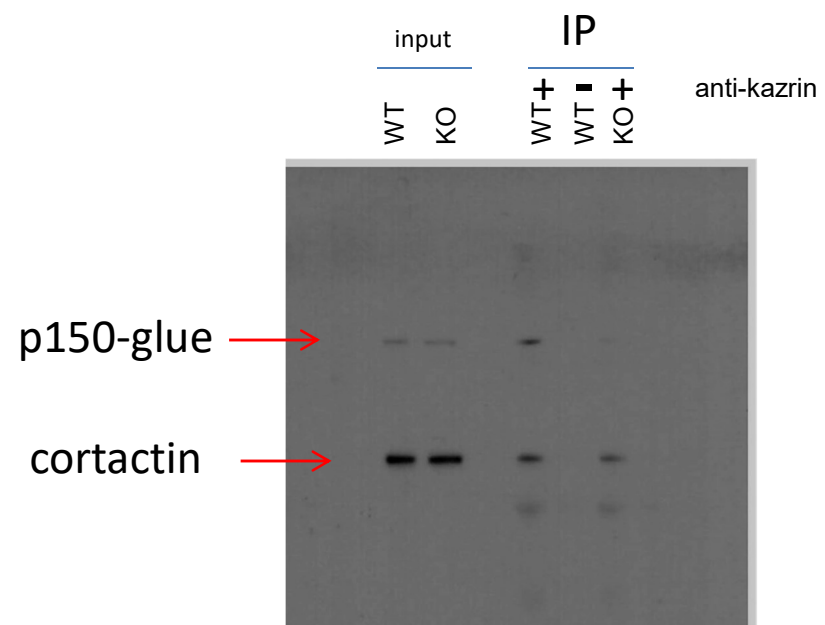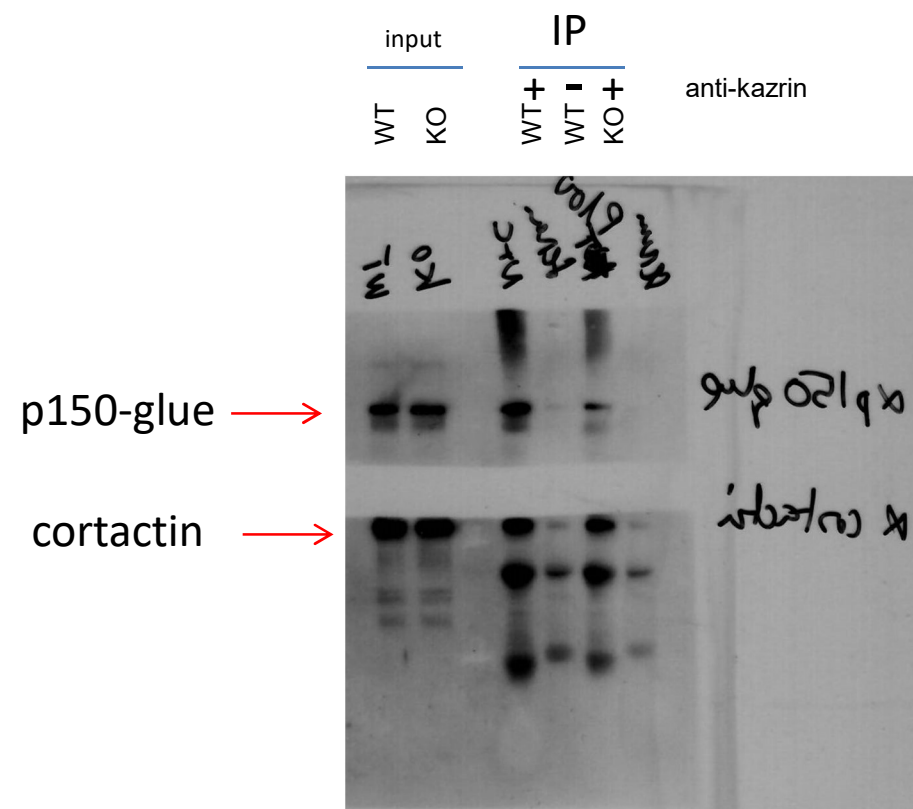

Long exposure

Supplement: supp [file elife-83793-supp-v1.zip]

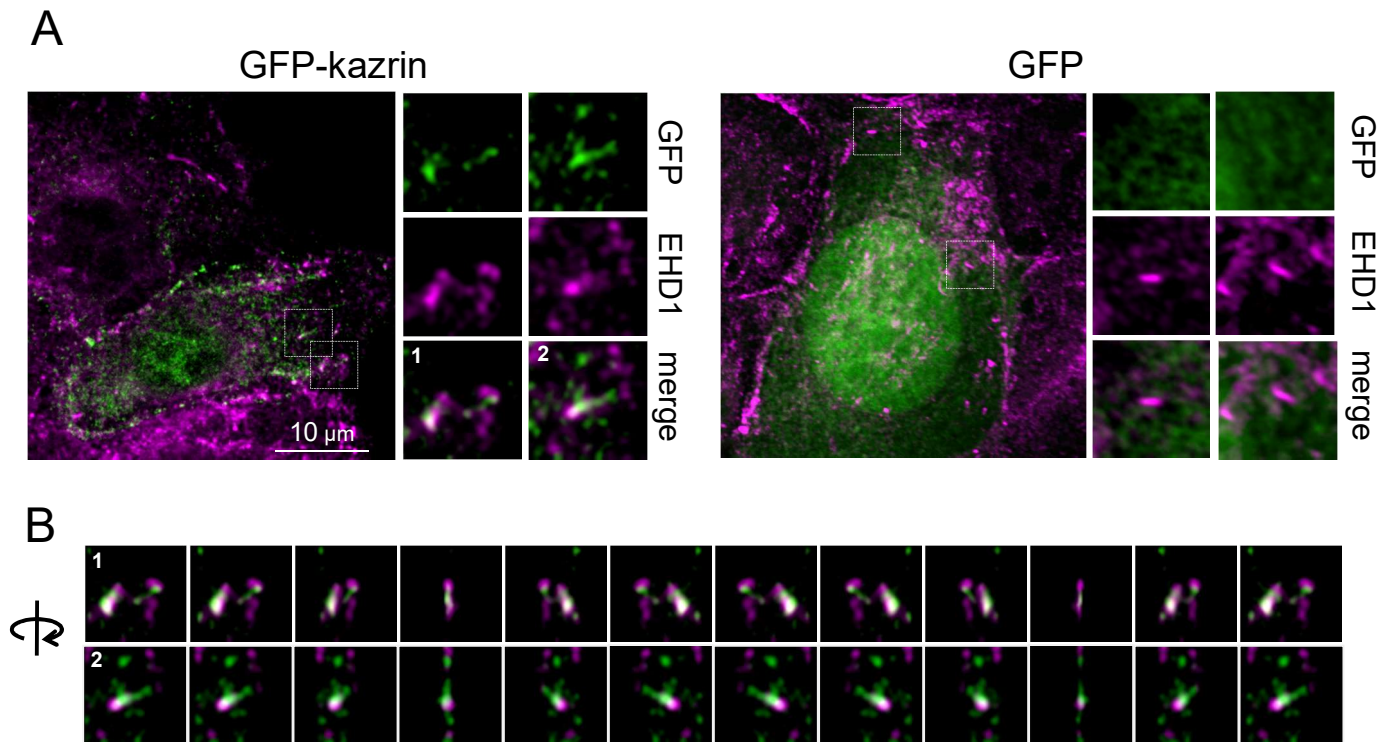

Supplement: supp [file elife-83793-supp-v1.zip]

Figure 4-figure supplement 1

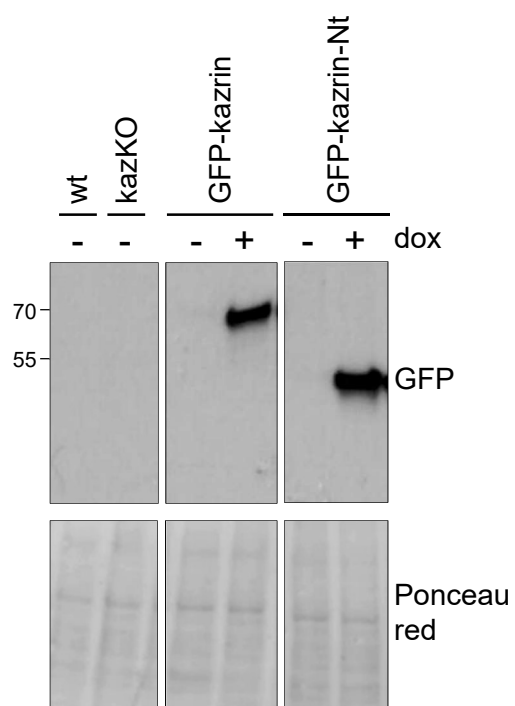

Supplement: supp [file elife-83793-supp-v1.zip]

Figure 1-figure supplement 3

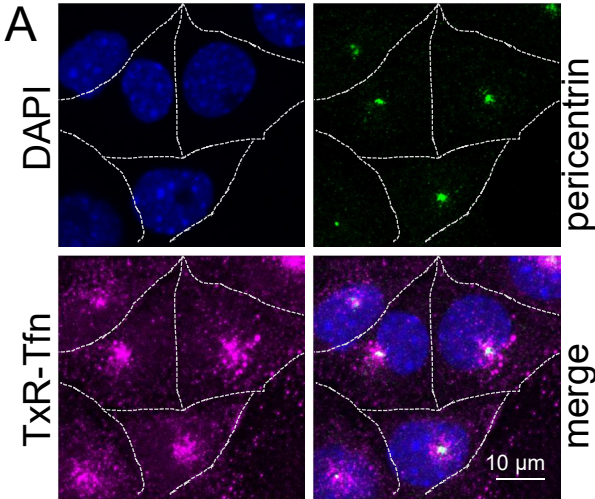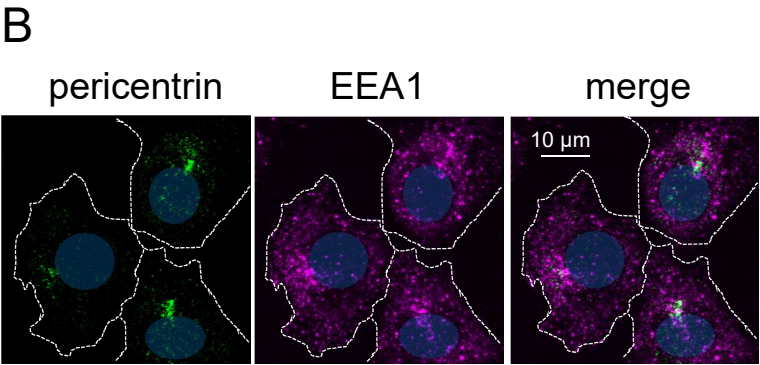

Supplement: supp [file elife-83793-supp-v1.zip]

Figure 1-figure supplement 1

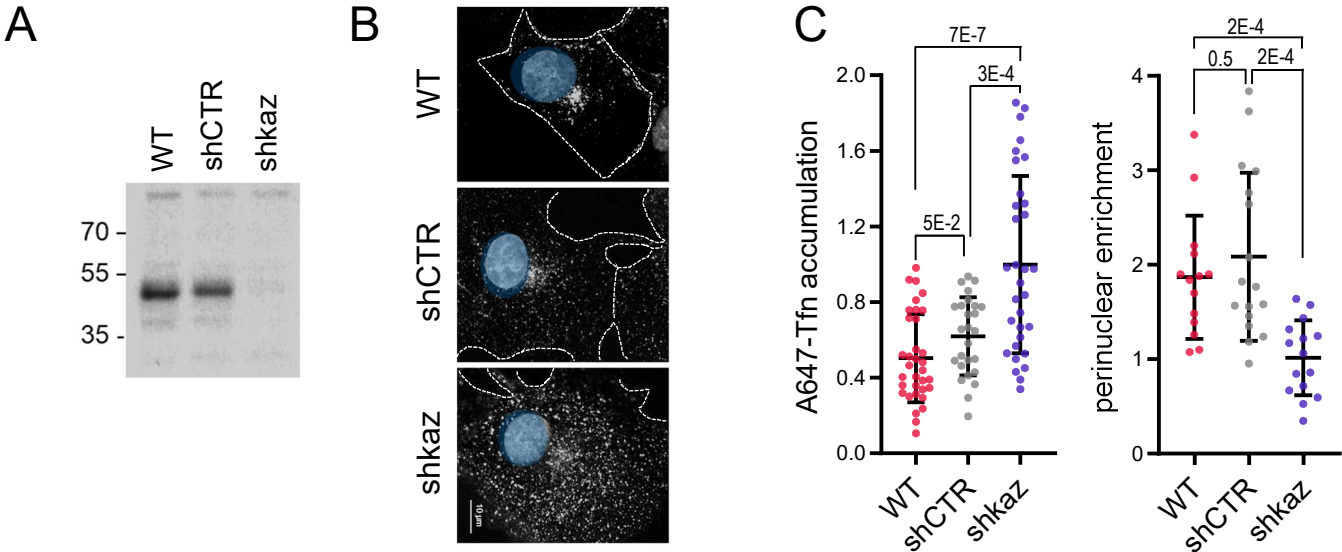

Supplement: supp [file elife-83793-supp-v1.zip]

Figure 3—figure supplement 1

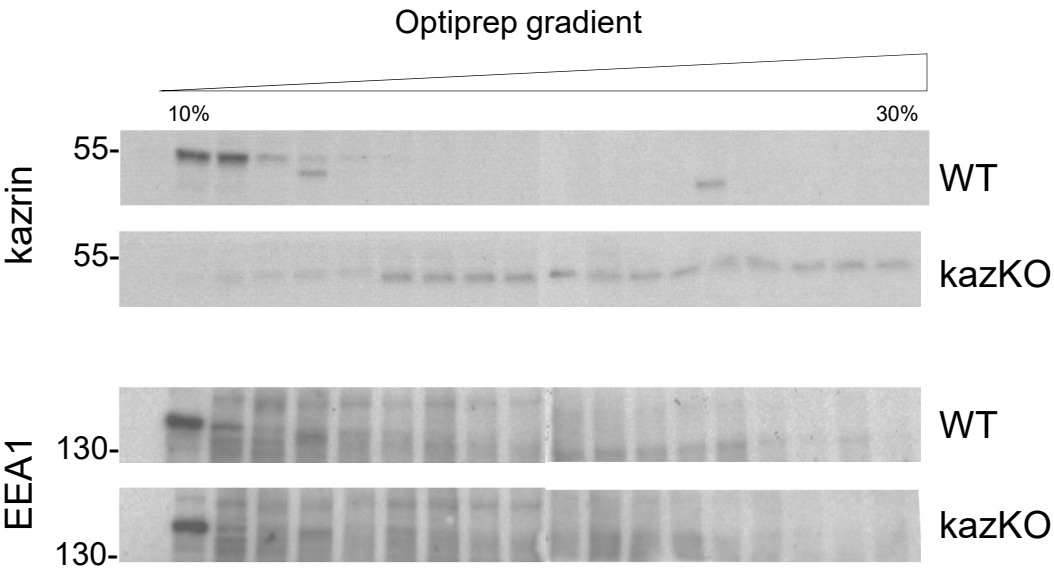

Supplement: supp [file elife-83793-supp-v1.zip]
